# Supplementary material
Source: ML conference proceedings conference paper supplement (https://openaccess.thecvf.com/content/CVPR2022/html/Gavrikov_CNN_Filter_DB_CVPR_2022_paper.html)
Supplement: Supplementary file 1 [file Gavrikov_CNN_Filter_DB_CVPR_2022_supplemental.zip]

# CNN Filter DB: An Empirical Investigation of Trained Convolutional Filters

## Supplementary Material

### A. Dataset details

We provide *CNN Filter DB* as a ca. 100 GB large HDF5 file which contains the unprocessed  $3 \times 3$  filters along with meta information as reported in Tab. 3.

We have collected models of the following tasks: *Classification, GAN-Generator, Segmentation, Object Detection, Style Transfer, Depth Estimation, Face Detection, Super Resolution, GAN-Discriminator, Face Recognition, Auto-Encoder*. The training sets were distributed into the following categories: *plants, natural, art, map, handwriting, medical ct, medical mri, depth, faces, textures, fractals, seismic, astronomy, thermal, medical xray, cars*.

A visualization of the accumulated frequency of models and filters by task, visual category, and training dataset combination can be found in Fig. 17. Heatmaps for aggregated frequency of filters/models by task and visual category are shown in Fig. 1.

As previously mentioned, we used rescaled filters for all distribution shift related experiments. In Fig. 2 we show the mean scale per layer depth decile of the unprocessed filters. We group the filters  $f$  by model and depth decile in sets  $S$  and compute the mean scale as follows:

$$\hat{scale} = \sum_{f \in S} \frac{\max_{ij} f_{ij} - \min_{ij} f_{ij}}{|S|} \quad (1)$$

The distributions show an unsurprising decrease with depth but also a high variance and many outliers across models, especially in the first two deciles.

Lastly, Tab. 4 contains all models we have used for our analysis.

### B. Derivation of randomness threshold

We draw  $n = 2^1, \dots, 2^{21}$  filters with  $3 \times 3$  shape from a standard normal distribution and calculate the entropy  $H$  as defined in the *Methods* section. We repeat this process 1000 times for each  $n$  and fit a sigmoid to the lowest entropy we have observed for each  $n$ . Fig. 3 shows the obtained samples alongside the fitted sigmoid  $T_H$ .

### C. Ablation study: Degeneration impact

As mentioned in the *Limitations* section, we attempted to reproduce our experiments with a dataset that did not include filters from degenerated layers. We applied the following selection criterion to detect degeneration based on

entropy  $H$  and sparsity  $S$  as defined in our *Methods* section:

$$(H \geq T_H - 0.02) \vee (H < 0.5) \wedge (S \geq 0.14) \quad (2)$$

While we had a solid foundation for the entropy upper bound (minus some noise), the lower bound for entropy and the bound for sparsity are based on the average we found in our datasets. Note that increasing the lower bound for  $H$  results in more similar distributions and therefore lower shift. Hence, this value should be picked very carefully to not filter out vital layers. Sparsity is usually seen in peaks around the center of the KDEs. Tuning this value has a significant impact on the shift (Fig. 6) since the large center peaks increase the KL-Divergence significantly (Fig. 4). With the selected threshold we fail to find a meaningful correlation between the ratio of degenerated layers and the average shift to other groups (i.e. *tasks* or *visual categories*; Fig. 5).

### D. Distribution shift by precision

We initially assumed that quantization may lead to the *spikes* phenotype, so we decided to test what shift we obtain when training with fp16 instead of fp32 precision. Spiky distributions should show high shifts in comparison to smooth distributions. We train all our low resolution models on *CIFAR-10* with the same hyperparameters and observe marginal shifts Fig. 7. Outliers with somewhat higher shifts include *MobileNet.v2*. But we have verified that the shift for *MobileNet.v2* does not exceed the shift one would measure by retraining with random seeds. The *ResNet-9* shift does not exceed its retraining shift, therefore we assume that this also applies to other models.

### E. Distribution shift by convolution depth

In addition to the main paper we also report the shift by absolute depth for the first 20 layers in Fig. 8 of *classification* models and the shift by relative depth for more tasks in Fig. 9. Please note, that Fig. 9e only contains the same network trained on different datasets.

### F. More principal components

In Fig. 10 we add interesting counter-parts to the filter basis shown in the main paper. As one can observe the filter basis remains quite similar. Changes usually affect the order of the components (since they are sorted by explained variance ratio), inversion (though this is not characteristic, since the coefficients can simply be inverted), and noise presumably due to degeneration. Fig. 11 contains the

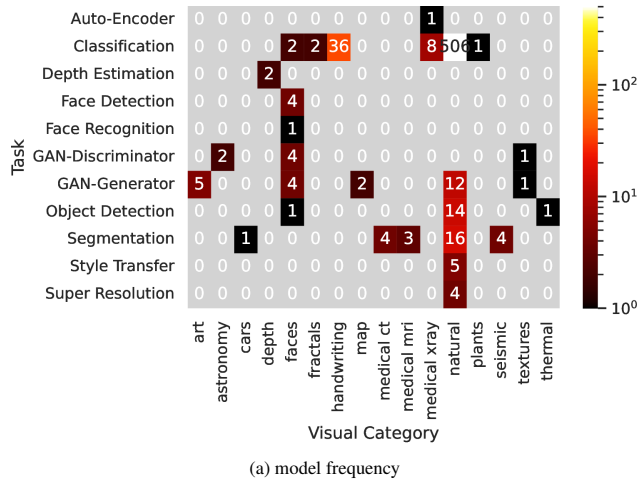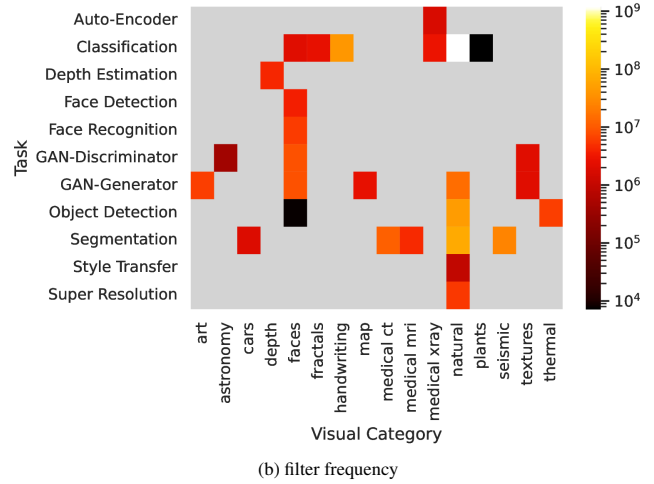

Figure 1. Bi-variate heatmap showing frequency aggregated by task and visual category.

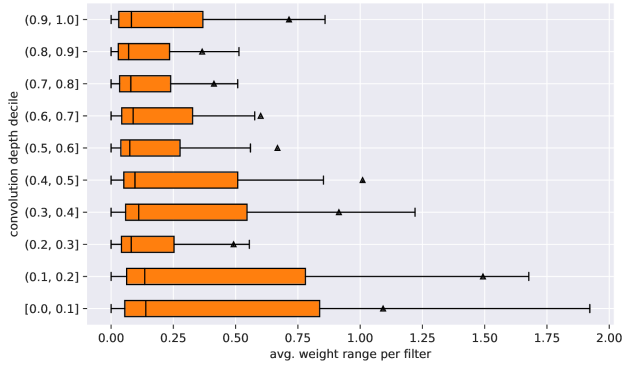

Figure 2. Boxplots showing average filter range per convolution depth decile (top to bottom in decreasing order) for each classification model in the dataset. Outliers are hidden for clarity.

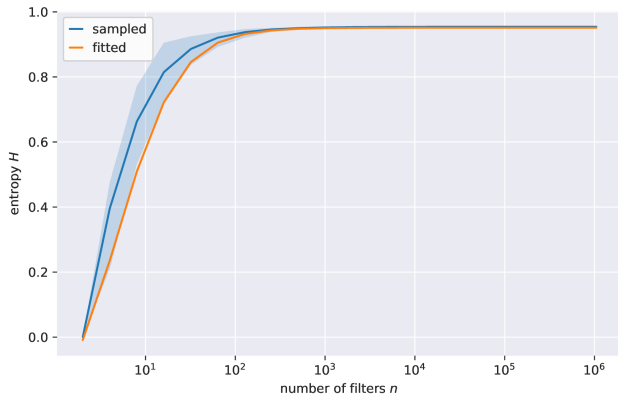

Figure 3. Sampled entropy for randomly initialized convolution layers with  $n$  filters and fitted sigmoid  $T_H$ .

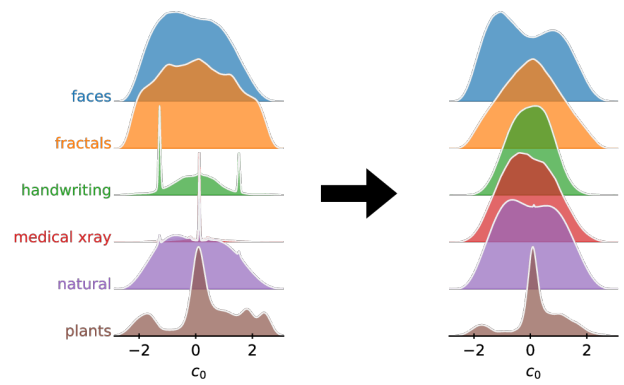

Figure 4. Most significant principal component KDEs of classification models by tasks before (left) and after removal of degenerated layers (right).

cumulative explained variance ratio plots for all tasks and visual categories. For the sake of completeness, we also add that SVD centering  $\bar{X} = [-0.04262863, -0.0411367, -0.04461834, -0.0407119, -0.03574134, -0.04268694, -0.04350573, -0.04138637, -0.04486743]$  for the full dataset.

## G. More KDEs plots

Fig. 18 shows the KDEs (KDEs created with [1]) for every principal component on the full dataset. Fig. 19 shows KDEs for all tasks. Fig. 21 shows only KDEs of tasks of models that were trained with datasets belonging to the natural visual category. Fig. 20 shows KDEs for every visual category. Some categories show shifts due to bias representation while other clearly contain a majority of degenerated filters. Fig. 22 show KDEs by the visual category of

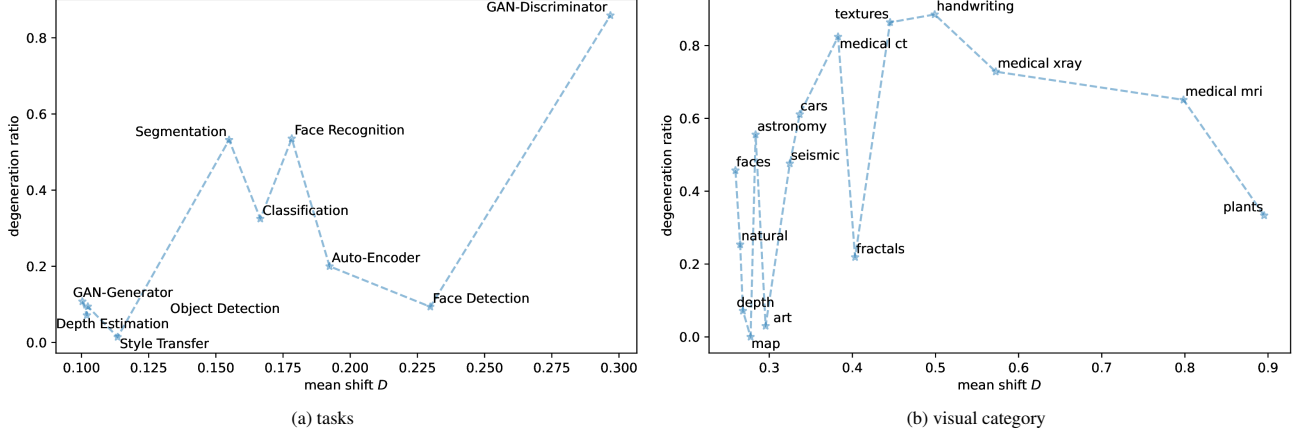

Figure 5. (Lack of) correlation between mean shift  $D$  and layer degeneration ratio.

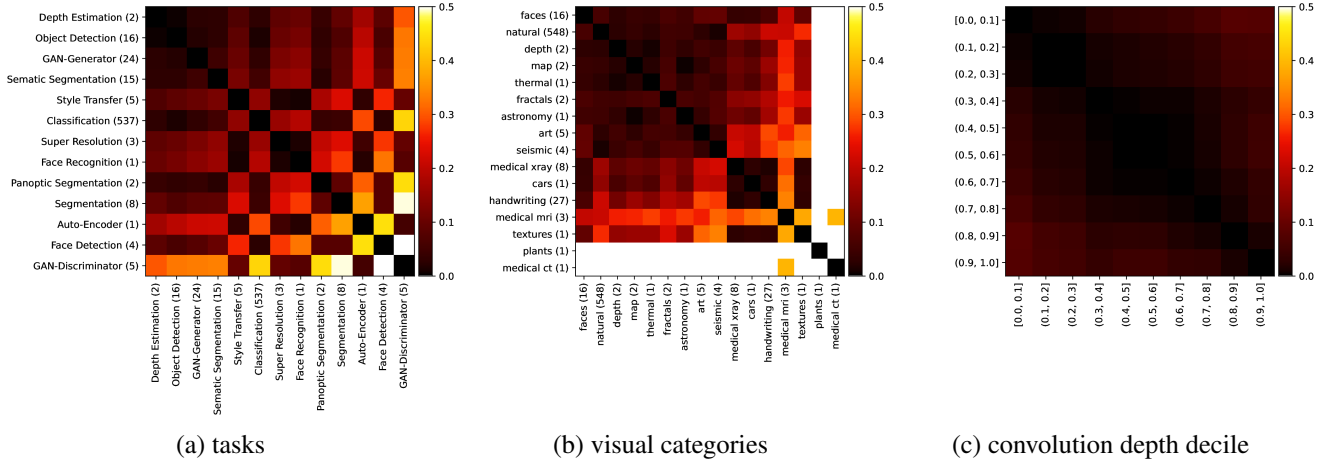

Figure 6. Heatmaps over the shift  $D$  for different filters groupings computed on the dataset *without degenerated layers*. The number in brackets denotes the number of models in this group. Low values/dark colors denote low shifts.

the training dataset limited to classification models. Several categories such as *medical xray*, *plants*, *handwriting* are clearly impacted by degeneration. Fig. 23 shows KDEs of classification models split by convolution depth decile. The distribution shift with depth reminds us of the shift of all filters we have seen during training *ResNet-9* in our *Results* section. Fig. 25 shows some selected models from the same family, showing clear shifts between the families but low shifts within. Lastly, Fig. 24 shows all models trained on *MNIST*. These are consist exclusively of the intentionally overparameterized models. The KDEs show very clear signs of major degeneration, by stark spikes, especially around null.

## H. Phenotype scatter plots

The main paper showed only scatter plots between two select coefficient distributions  $c_i$  and  $c_j$ . Here we include

the all bi-variate scatter plots of selected examples for each phenotype over all pairs of distributions (i.e.  $i = 0, \dots, 8$  and  $j = 0, \dots, 8$ ):

Fig. 12 shows the scatter plots over all filters that we have extracted; Fig. 13 shows *spikes* of filters that belong to the visual category *medical ct*; Fig. 14 shows *symbols* based on filters that belong to an *EfficientNet-l2-ns-475* pretrained on the massive *JFT-300m* and fintetuned on *ImageNet1k*; Fig. 15 shows *point* computed on filters of our intentionally overparameterized models trained on *MNIST*; and Fig. 16 shows *spikes* computed on filters of the task *depth estimation*.

## I. Training of low resolution models

Models were taken from [2] and slightly modified by us to support different input channel and class modalities. Additionally, some more architectures were added. Generally,

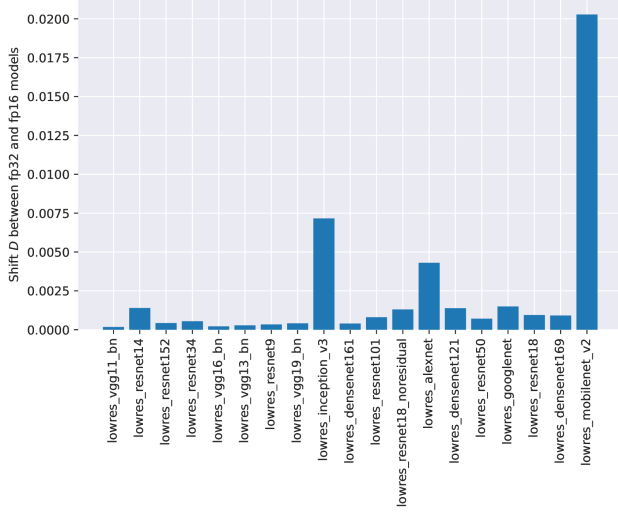

Figure 7. Distribution shift  $D$  between low resolution models between trained on *CIFAR-10* with fp16 and fp32 precision.

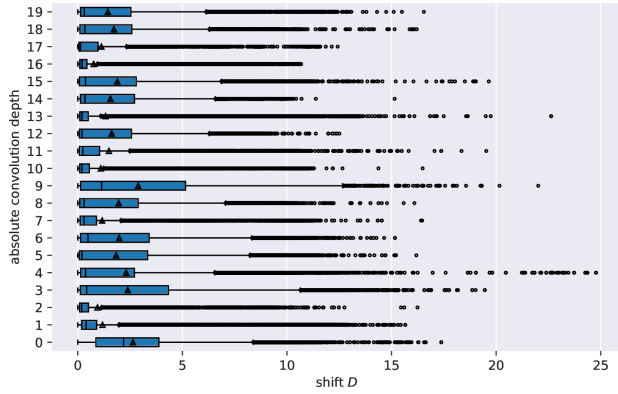

Figure 8. Boxplots showing the distribution of pair-wise model-to-model shift  $D$  of *classification* models per convolution depth. Our intentionally overparameterized models were left out of this analysis.

these models are quite similar to the architectures proposed in their respective original publications. However typically, Pooling will be reduced, dilated or strided convolutions will be replaced by regular convolutions, and convolution kernel sizes are reduced to be no larger than  $3 \times 3$ .

All models are trained on NVIDIA A100 GPUs and hyper-parameters independent of the dataset. Stochastic matrix multiplication is turned off via cuDNN settings. Inputs are scaled to  $32 \times 32$  px and channel-wise normalized. CIFAR data is additionally zero-padded by 4 px along each dimension, and then transformed using a  $32 \times 32$  random crops, and random horizontal flips. For the hyper parameters an initial learning rate of  $1e-8$ , a weight decay of  $1e-2$ , a batch-size of 256 and a nesterov momentum of 0.9 is used.

Table 1. Performance of retrained ResNet-9 models with random seeds obtained after the validation epoch with the highest validation accuracy.

| Model ID  | Best Epoch | Train Loss | Train Accur. | Valid. Loss | Valid. Accur. |
|-----------|------------|------------|--------------|-------------|---------------|
| resnet9_0 | 93         | 0.016      | 99.996       | 0.174       | 94.792        |
| resnet9_1 | 94         | 0.016      | 99.980       | 0.176       | 94.631        |
| resnet9_2 | 96         | 0.016      | 99.986       | 0.177       | 94.571        |
| resnet9_3 | 89         | 0.017      | 99.976       | 0.175       | 94.812        |
| resnet9_4 | 99         | 0.015      | 99.992       | 0.175       | 94.762        |
| resnet9_5 | 94         | 0.016      | 99.994       | 0.174       | 94.822        |
| resnet9_6 | 91         | 0.016      | 99.986       | 0.175       | 94.812        |
| resnet9_7 | 94         | 0.016      | 99.994       | 0.173       | 94.852        |
| resnet9_8 | 91         | 0.017      | 99.992       | 0.174       | 94.862        |
| resnet9_9 | 96         | 0.016      | 99.988       | 0.178       | 94.832        |

A SGD optimizer is used, and scheduled to linearly increase the learning rate on each step for the first 30 epochs to  $1e-1$ . Then, a cosine annealing schedule follows for the remaining 70 epochs. The loss is determined using Categorical Cross Entropy. Results are reported in Tab. 2.

## J. Training of ResNet-9 variants on CIFAR-10

The *ResNet-9* models were trained as detailed in Appendix I. However, the different random seed were provided for each model. Results are reported in Tab. 1.

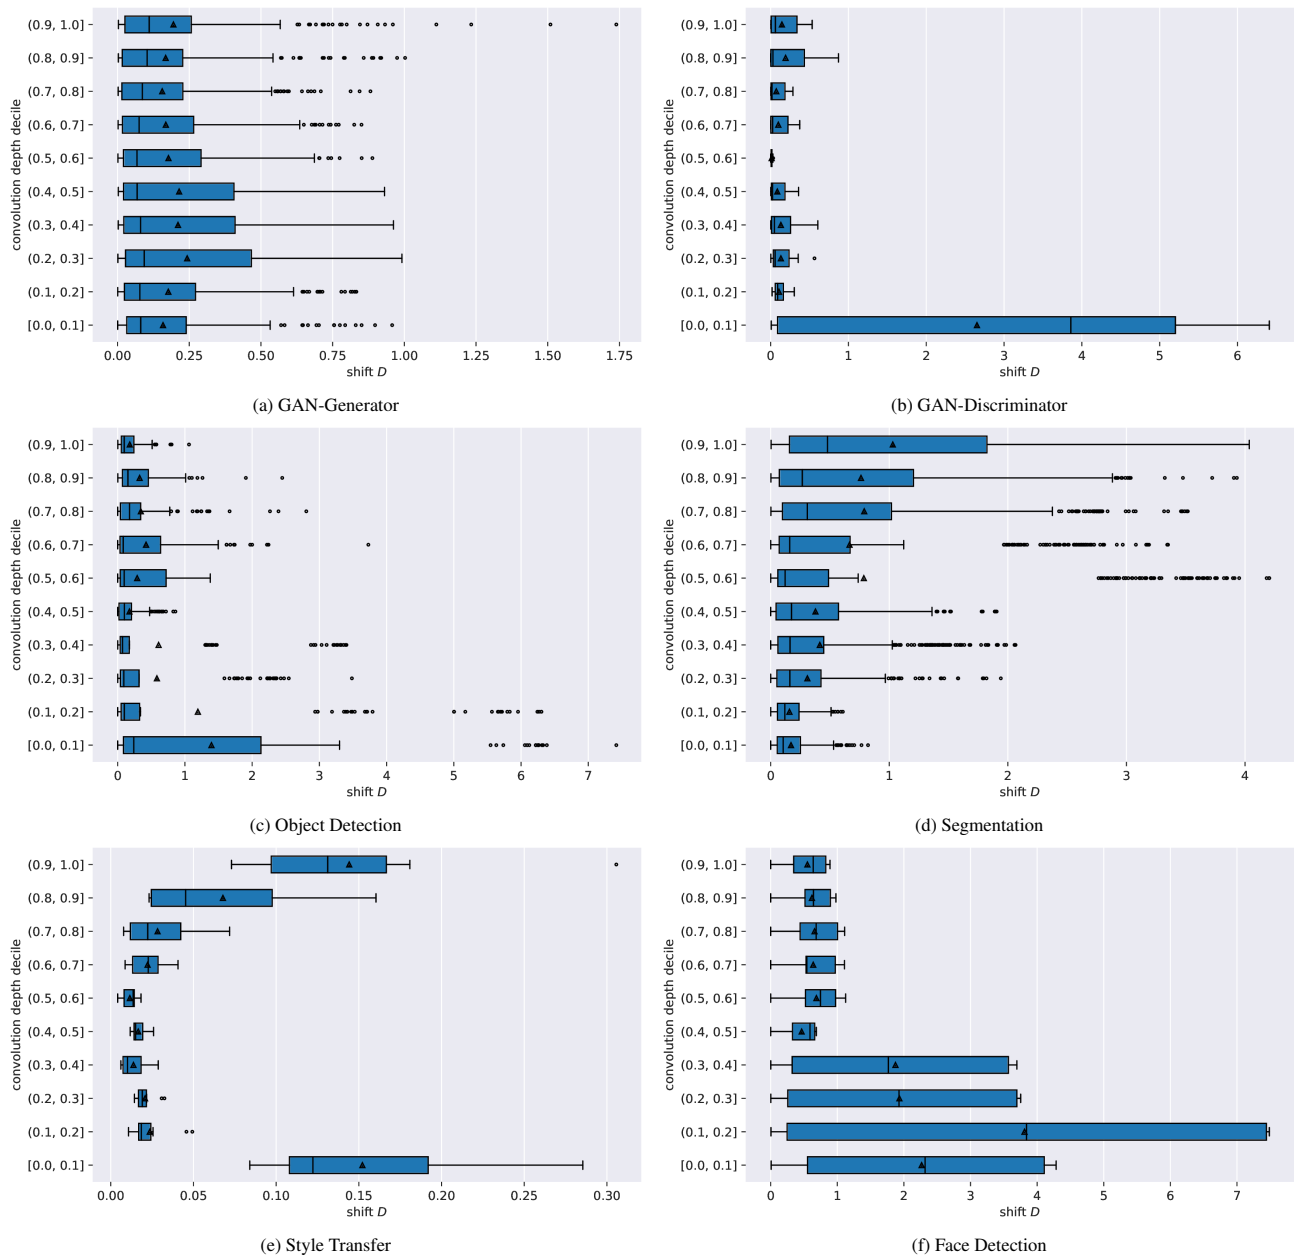

Figure 9. Boxplots showing the distribution of pair-wise model-to-model shift  $D$  of models trained for various tasks per convolution depth decile. Note the change in scale of the x-axis.

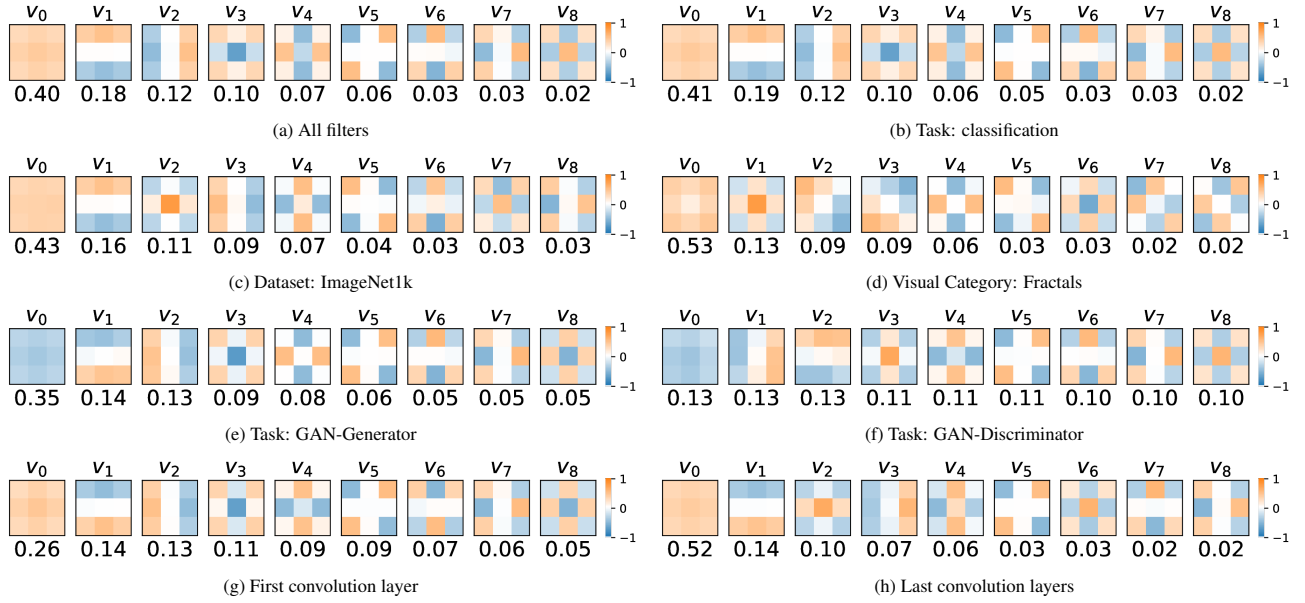

Figure 10. Depiction of the filter basis and (cumulative) explained variance ratio per component for filters grouped by various meta-data dimensions.

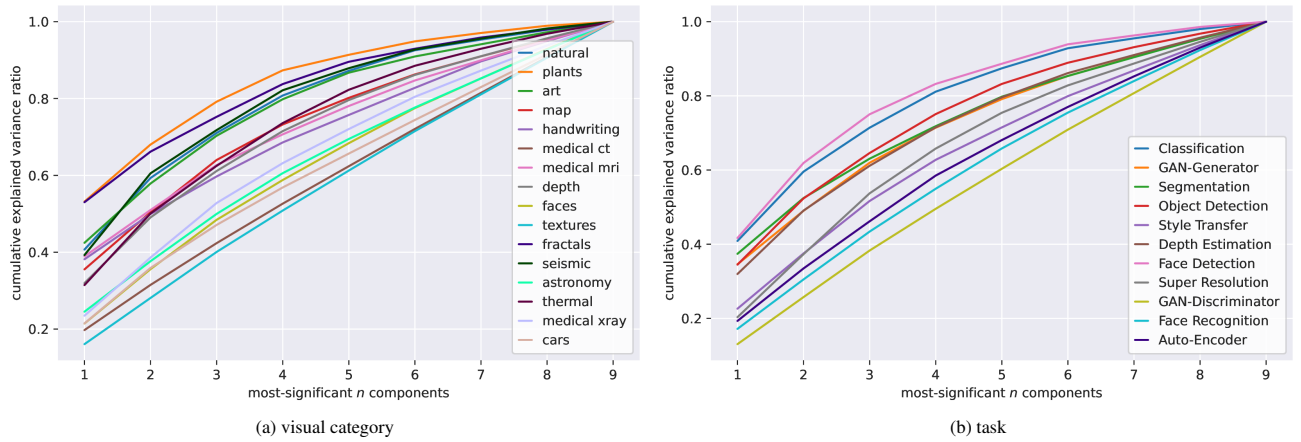

Figure 11. Cumulative ratio of explained variance over the first  $n$  components by all tasks and visual categories.

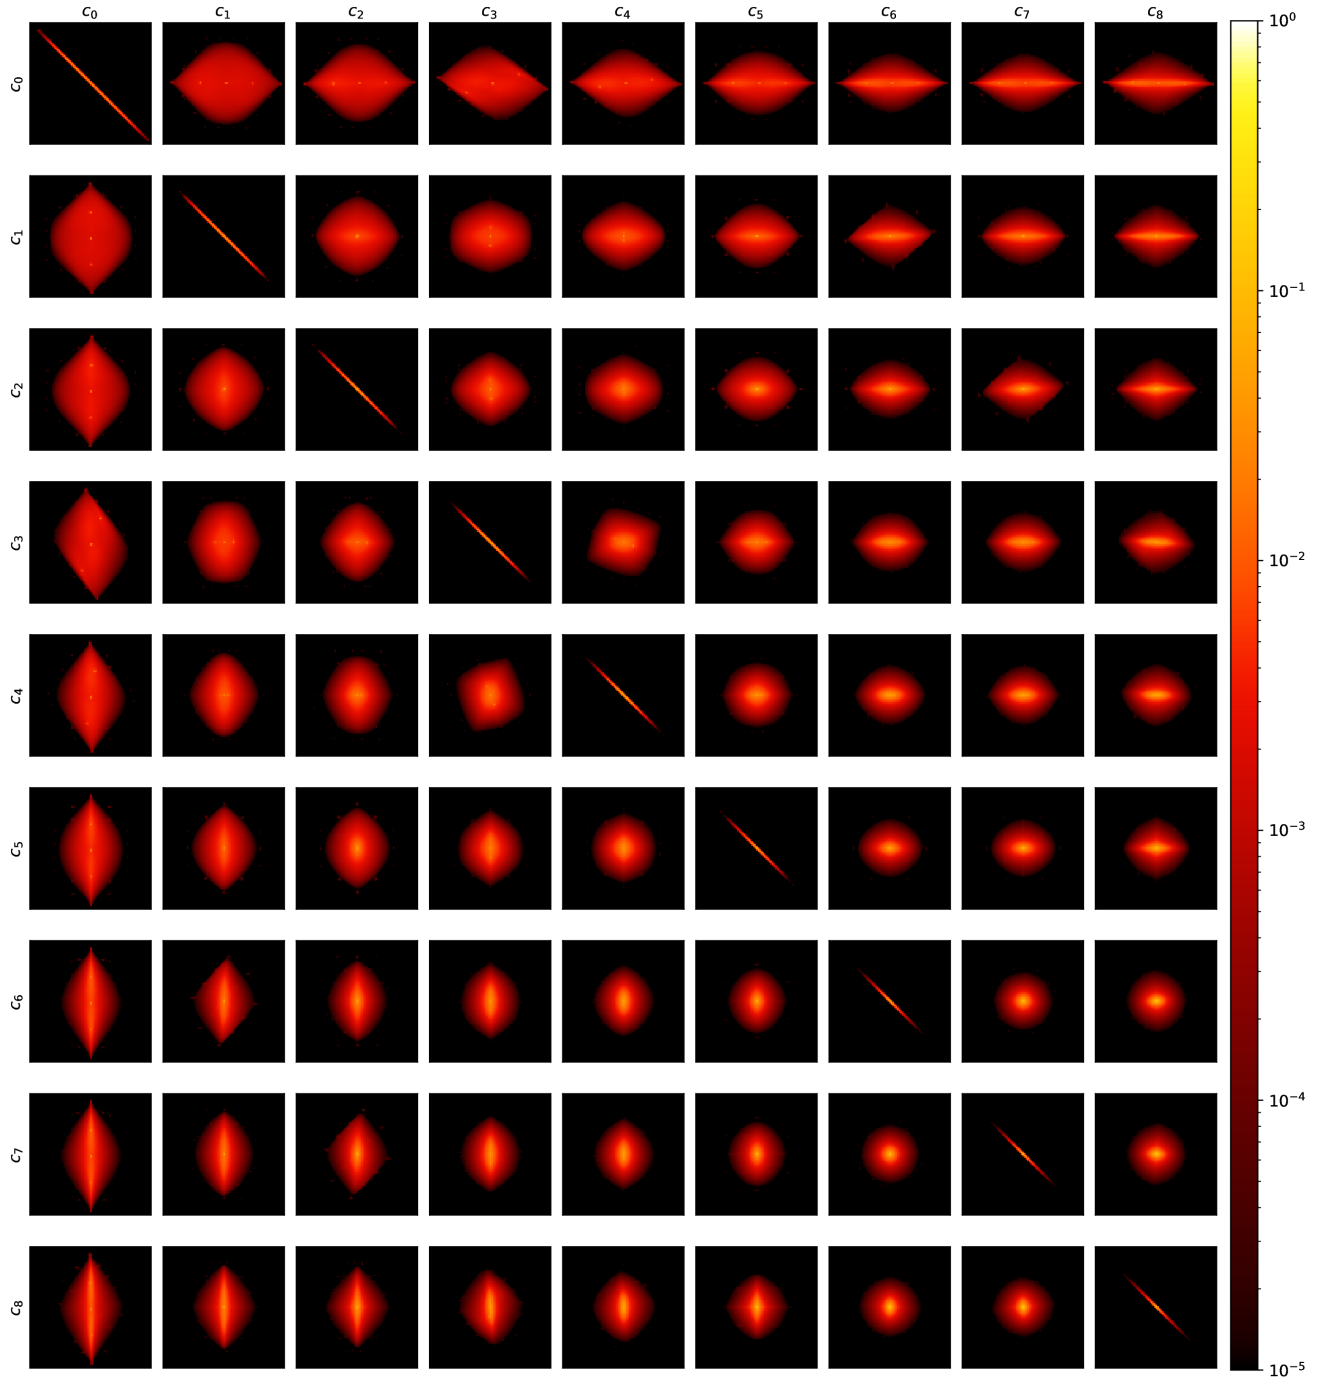

Figure 12. Bi-variate coefficient scatter plot over the full dataset.

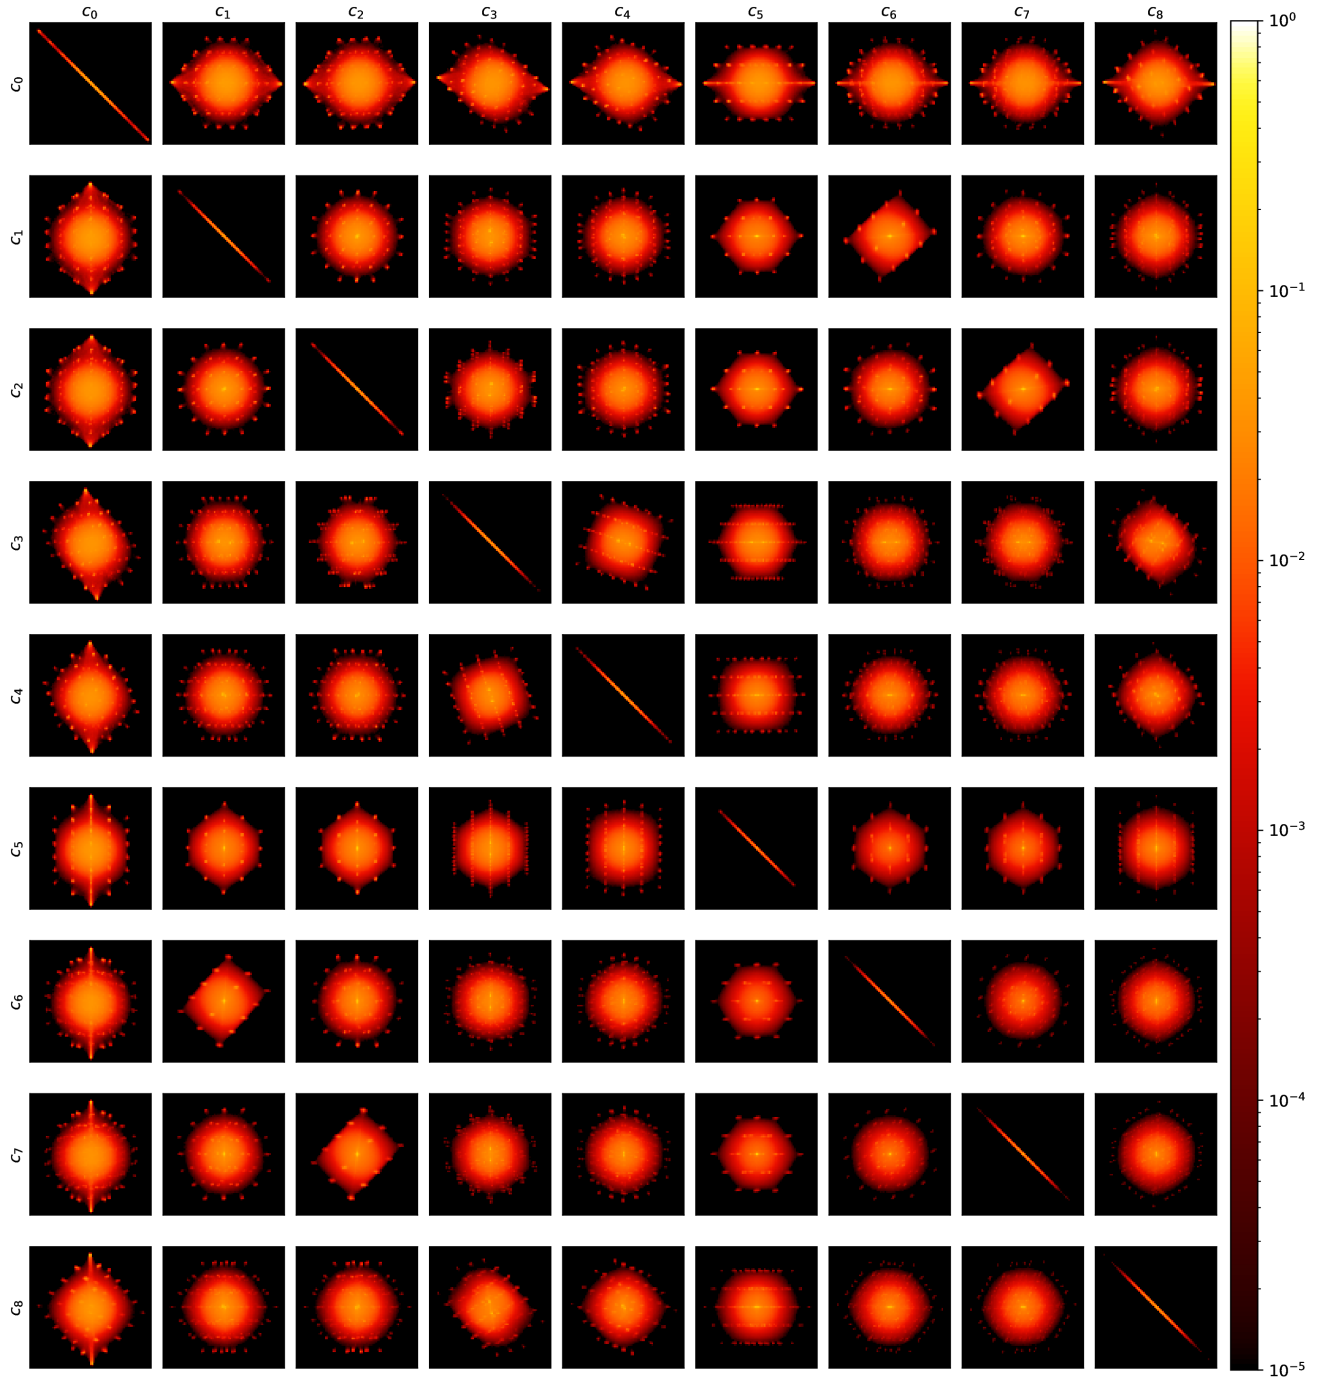

Figure 13. Bi-variate coefficient scatter plot of the phenotype *spikes*.



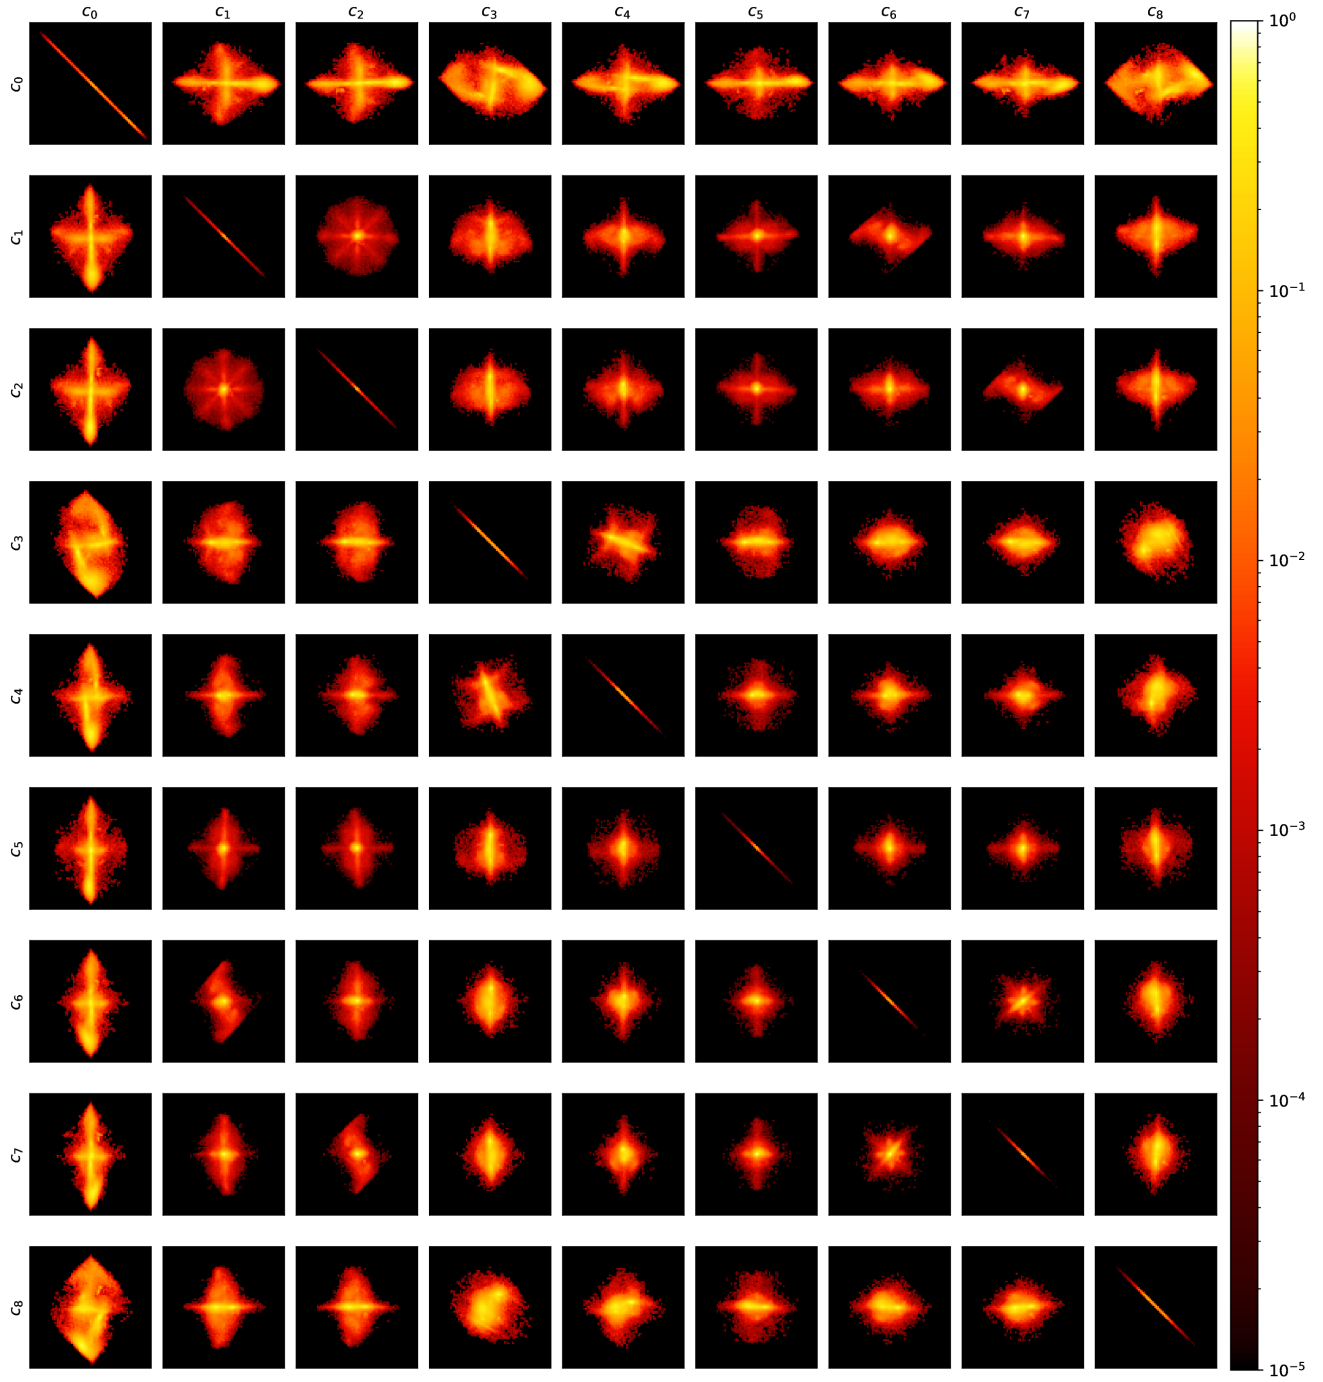

Figure 14. Bi-variate coefficient scatter plot of the phenotype *symbols*.

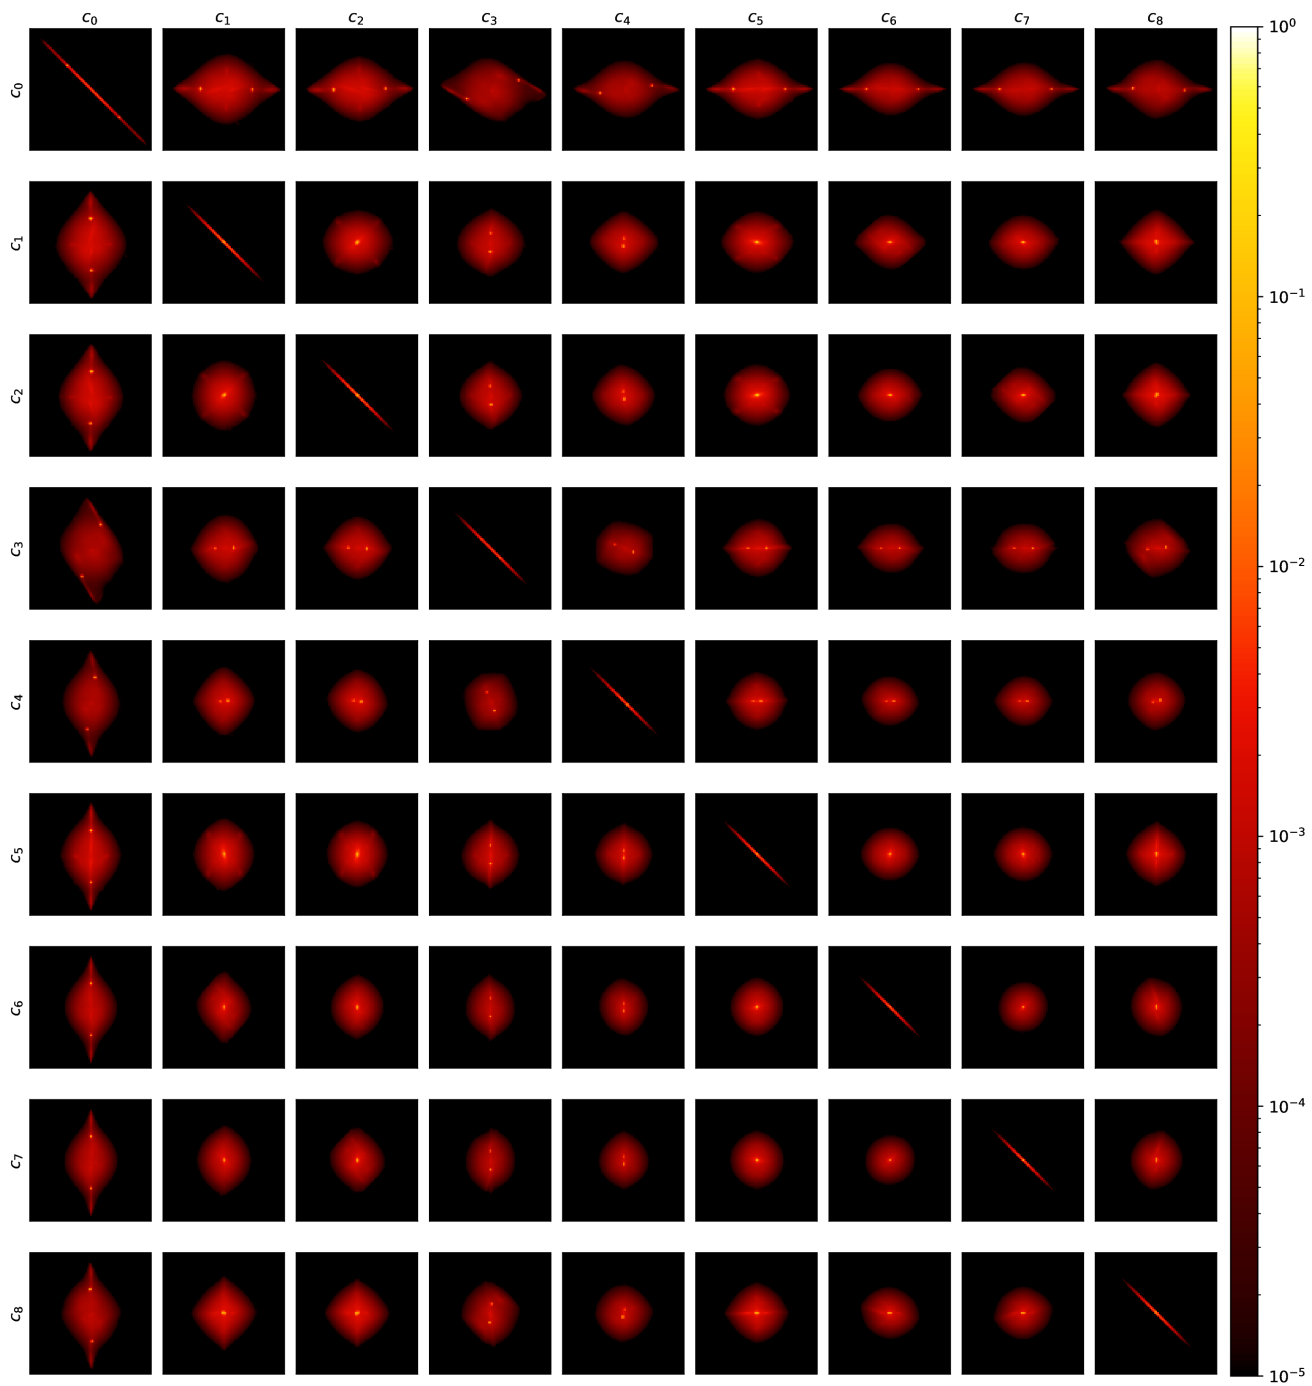

Figure 15. Bi-variate coefficient scatter plot of the phenotype *point*.

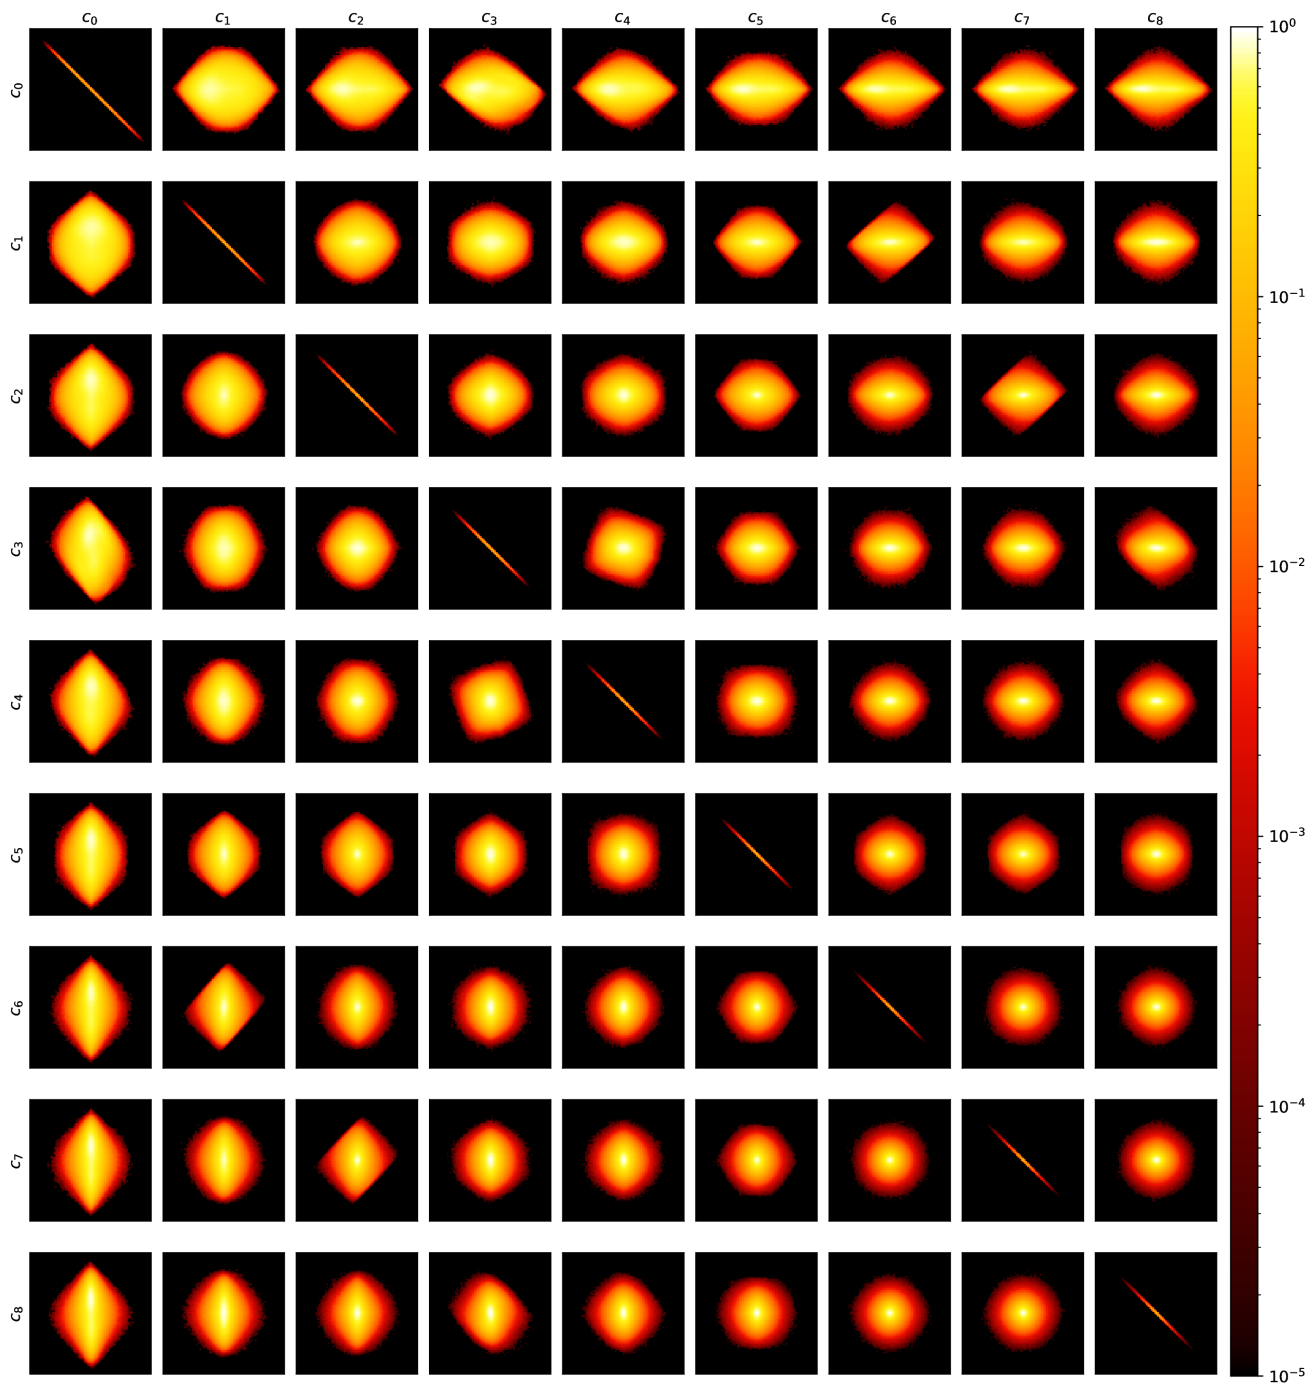

Figure 16. Bi-variate coefficient scatter plot of the phenotype *sun*.

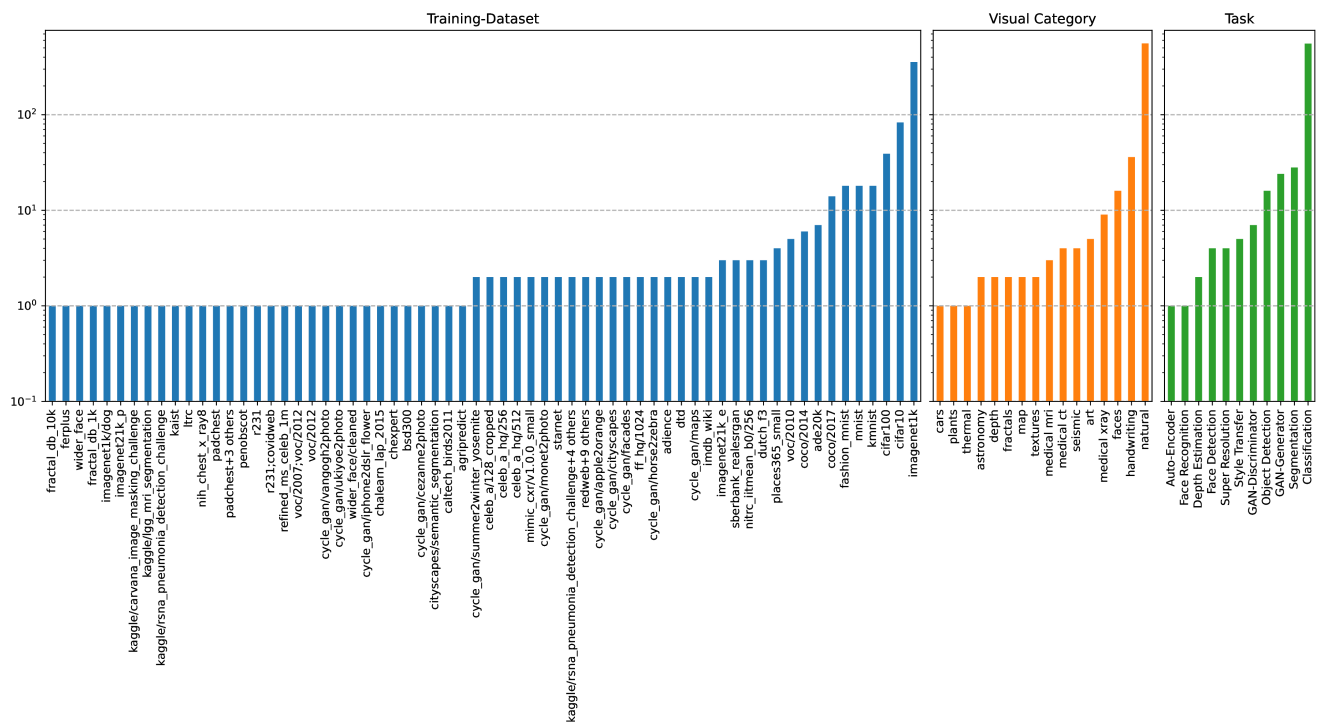

(a) model frequency

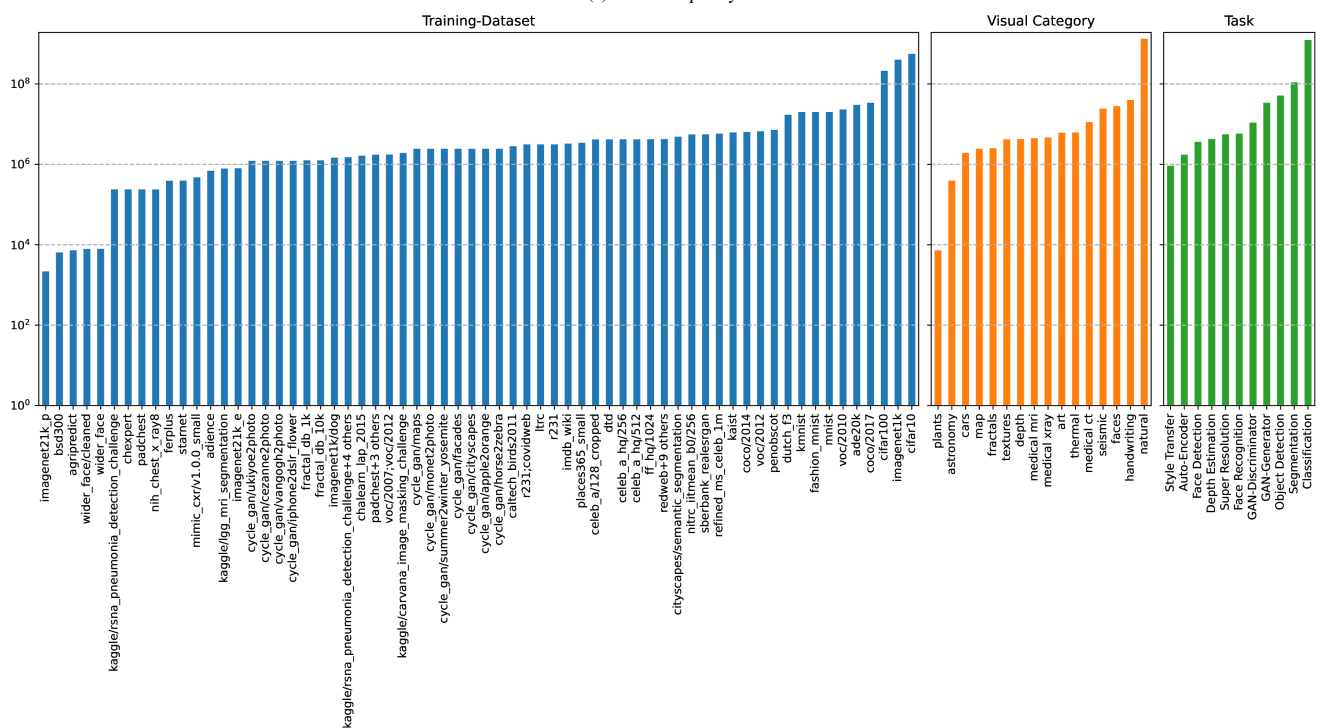

(b) filter frequency

Figure 17. Total frequency per filter sub-set. Log scale.

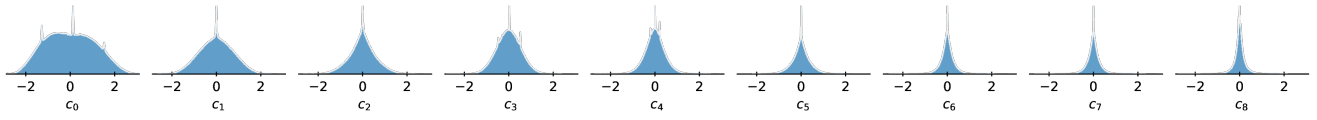

Figure 18. Distribution of the coefficients along the principal components of the **full dataset**.

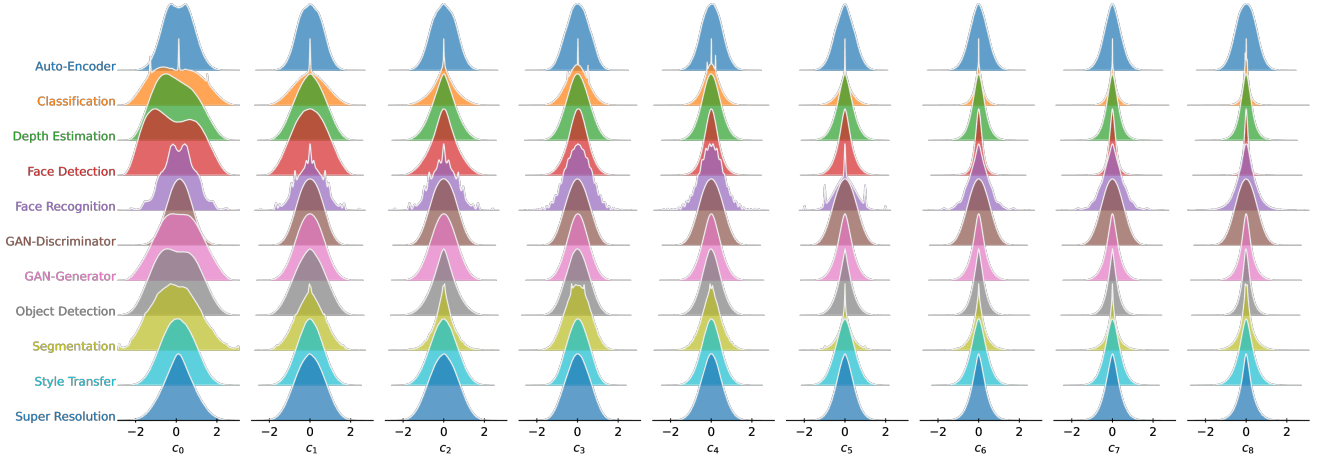

Figure 19. Distribution of the coefficients along the principal components by **model task**.

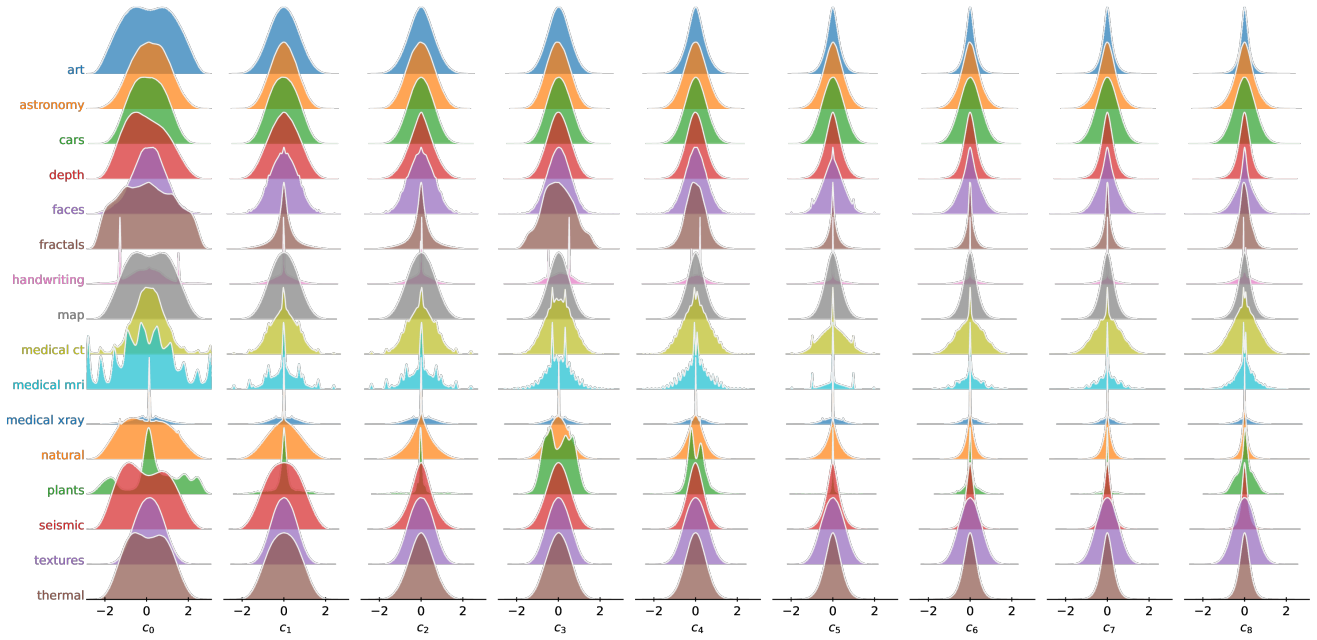

Figure 20. Distribution of the coefficients along the principal components by **visual category**.

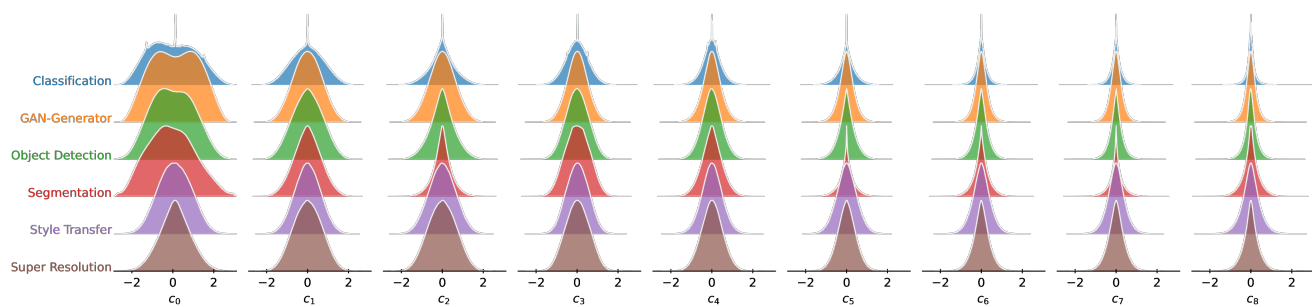

Figure 21. Distribution of the coefficients along the principal components by **model task** for datasets belonging to the **natural visual category**.

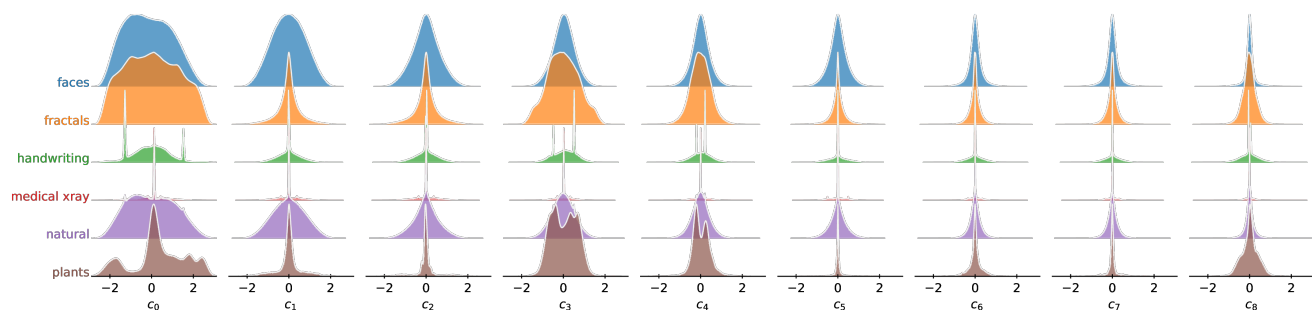

Figure 22. Distribution of the coefficients along the principal components by **visual training category** for image classification models.

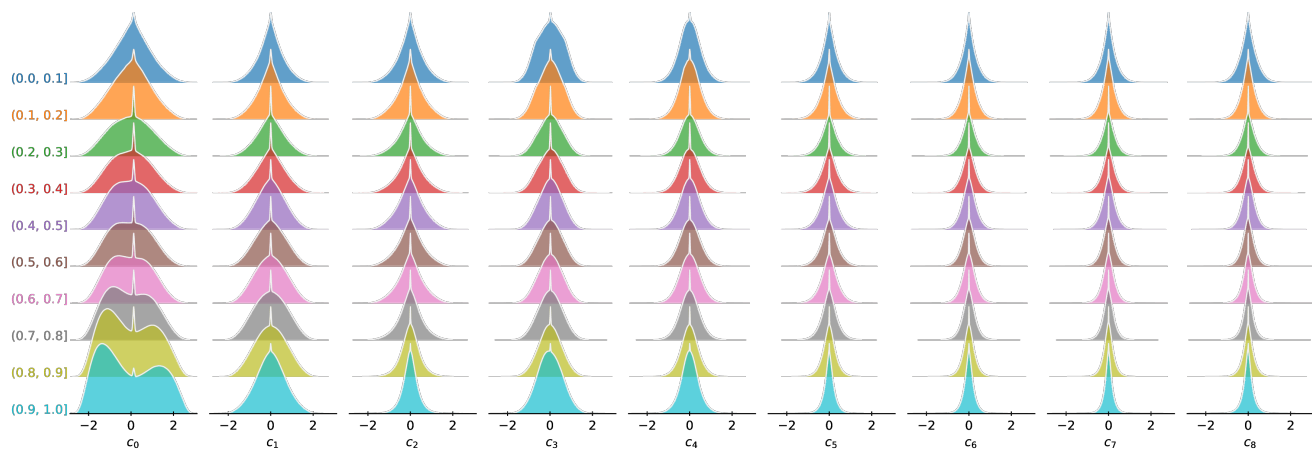

Figure 23. Distribution of the coefficients along the principal components by **convolution depth decile** for image classification models.

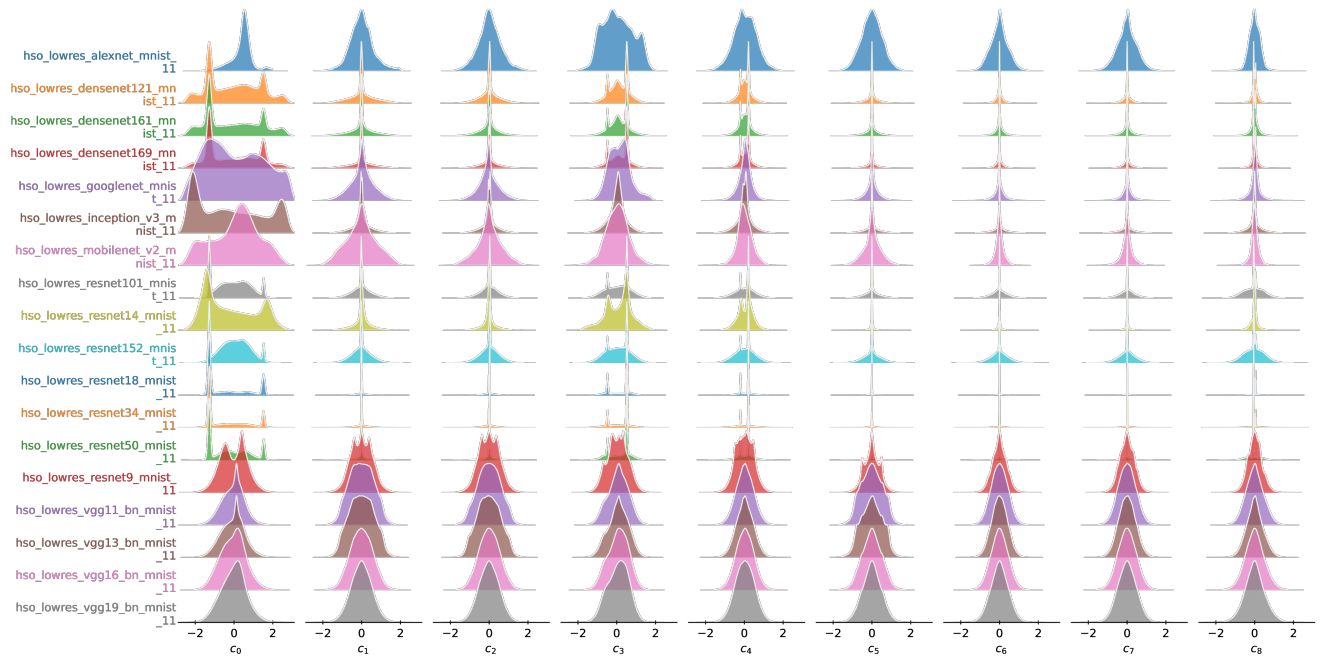

Figure 24. Distribution of the coefficients along the principal components of models trained on the **MNIST** dataset. All these models belong to our **intentionally overparameterized models**.

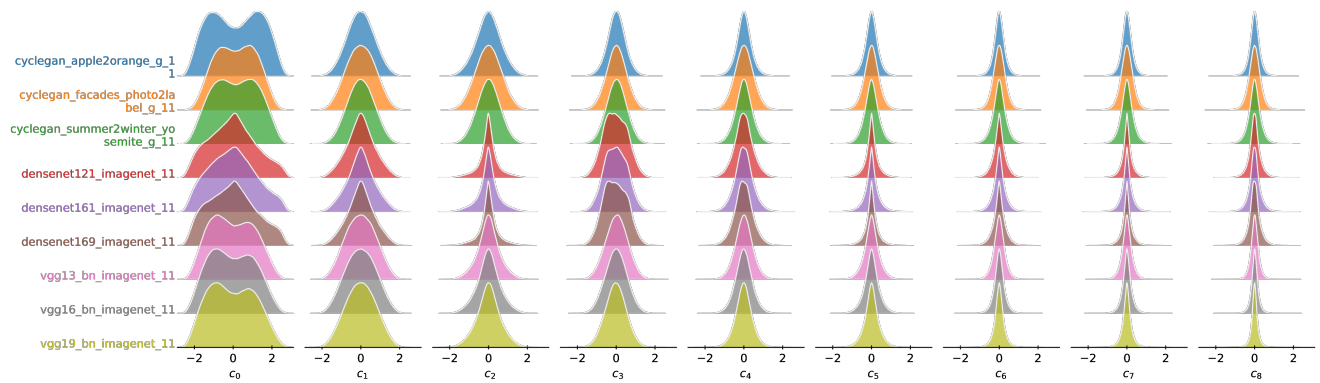

Figure 25. Distribution of the coefficients along the principal components of **selected models from similar families**.

Table 2. Performance of low resolution models with random seeds obtained after the validation epoch with the highest validation accuracy.

| Dataset  | Model        | Best Epoch | Train Loss | Train Acc. | Val. Loss | Val. Acc. |
|----------|--------------|------------|------------|------------|-----------|-----------|
| cifar10  | alexnet      | 95         | 0.563      | 80.717     | 0.604     | 79.297    |
| cifar10  | densenet121  | 96         | 0.047      | 99.716     | 0.247     | 93.780    |
| cifar10  | densenet161  | 97         | 0.042      | 99.830     | 0.232     | 94.311    |
| cifar10  | densenet169  | 98         | 0.046      | 99.742     | 0.235     | 94.171    |
| cifar10  | googlenet    | 97         | 0.064      | 99.651     | 0.242     | 92.919    |
| cifar10  | inception_v3 | 96         | 0.062      | 99.501     | 0.254     | 93.550    |
| cifar10  | mobilenet_v2 | 96         | 0.074      | 98.892     | 0.237     | 93.760    |
| cifar10  | resnet101    | 96         | 0.041      | 99.329     | 0.242     | 93.399    |
| cifar10  | resnet14     | 97         | 0.040      | 99.567     | 0.254     | 92.588    |
| cifar10  | resnet152    | 99         | 0.032      | 99.629     | 0.249     | 93.490    |
| cifar10  | resnet18     | 97         | 0.033      | 99.685     | 0.250     | 92.929    |
| cifar10  | resnet34     | 99         | 0.027      | 99.714     | 0.253     | 93.399    |
| cifar10  | resnet50     | 97         | 0.039      | 99.473     | 0.227     | 93.780    |
| cifar10  | resnet9      | 93         | 0.016      | 99.996     | 0.174     | 94.792    |
| cifar10  | vgg11_bn     | 95         | 0.024      | 99.860     | 0.254     | 92.258    |
| cifar10  | vgg13_bn     | 98         | 0.021      | 99.942     | 0.198     | 94.111    |
| cifar10  | vgg16_bn     | 99         | 0.021      | 99.912     | 0.228     | 93.930    |
| cifar10  | vgg19_bn     | 97         | 0.022      | 99.878     | 0.242     | 93.800    |
| cifar100 | densenet121  | 94         | 0.192      | 98.678     | 1.082     | 75.040    |
| cifar100 | densenet161  | 98         | 0.171      | 99.373     | 1.044     | 76.412    |
| cifar100 | densenet169  | 97         | 0.177      | 99.171     | 1.063     | 75.341    |
| cifar100 | googlenet    | 97         | 0.331      | 98.109     | 1.077     | 73.417    |
| cifar100 | inception_v3 | 97         | 0.276      | 98.395     | 1.055     | 75.040    |
| cifar100 | mobilenet_v2 | 93         | 0.342      | 94.940     | 1.009     | 75.200    |
| cifar100 | resnet101    | 95         | 0.133      | 98.596     | 1.070     | 74.740    |
| cifar100 | resnet14     | 98         | 0.380      | 93.321     | 1.110     | 70.673    |
| cifar100 | resnet152    | 97         | 0.127      | 98.846     | 1.059     | 74.720    |
| cifar100 | resnet18     | 98         | 0.163      | 98.257     | 1.103     | 72.536    |
| cifar100 | resnet34     | 97         | 0.103      | 99.165     | 1.161     | 72.546    |
| cifar100 | resnet50     | 96         | 0.131      | 98.834     | 1.062     | 74.159    |
| cifar100 | resnet9      | 91         | 0.075      | 99.806     | 1.000     | 75.591    |
| cifar100 | vgg11_bn     | 98         | 0.095      | 99.303     | 1.307     | 69.621    |
| cifar100 | vgg13_bn     | 94         | 0.088      | 99.393     | 1.158     | 73.017    |
| cifar100 | vgg16_bn     | 96         | 0.110      | 98.702     | 1.267     | 72.907    |
| cifar100 | vgg19_bn     | 96         | 0.136      | 97.917     | 1.349     | 71.945    |
| mnist    | alexnet      | 86         | 0.053      | 98.444     | 0.045     | 98.668    |
| mnist    | densenet121  | 92         | 0.035      | 99.980     | 0.044     | 99.579    |
| mnist    | densenet161  | 93         | 0.035      | 99.983     | 0.043     | 99.609    |
| mnist    | densenet169  | 96         | 0.036      | 99.977     | 0.042     | 99.649    |
| mnist    | googlenet    | 90         | 0.046      | 99.873     | 0.045     | 99.579    |
| mnist    | inception_v3 | 98         | 0.046      | 99.873     | 0.041     | 99.679    |
| mnist    | mobilenet_v2 | 96         | 0.035      | 99.983     | 0.042     | 99.659    |
| mnist    | resnet101    | 87         | 0.020      | 99.978     | 0.032     | 99.539    |
| mnist    | resnet14     | 80         | 0.021      | 99.985     | 0.030     | 99.669    |
| mnist    | resnet152    | 94         | 0.019      | 99.990     | 0.030     | 99.589    |
| mnist    | resnet18     | 83         | 0.020      | 99.993     | 0.030     | 99.639    |
| mnist    | resnet34     | 79         | 0.019      | 99.977     | 0.029     | 99.609    |
| mnist    | resnet50     | 86         | 0.020      | 99.982     | 0.032     | 99.559    |
| mnist    | resnet9      | 83         | 0.006      | 99.998     | 0.016     | 99.679    |
| mnist    | vgg11_bn     | 75         | 0.017      | 99.995     | 0.027     | 99.639    |
| mnist    | vgg13_bn     | 90         | 0.017      | 99.998     | 0.026     | 99.649    |
| mnist    | vgg16_bn     | 90         | 0.017      | 99.992     | 0.026     | 99.639    |
| mnist    | vgg19_bn     | 85         | 0.017      | 99.988     | 0.027     | 99.649    |
| kmnist   | alexnet      | 97         | 0.047      | 98.775     | 0.191     | 94.872    |
| kmnist   | densenet121  | 88         | 0.037      | 99.982     | 0.092     | 98.668    |
| kmnist   | densenet161  | 87         | 0.038      | 99.972     | 0.084     | 98.688    |
| kmnist   | densenet169  | 89         | 0.037      | 99.987     | 0.096     | 98.518    |
| kmnist   | googlenet    | 97         | 0.044      | 99.970     | 0.112     | 97.947    |
| kmnist   | inception_v3 | 97         | 0.044      | 99.970     | 0.090     | 98.658    |

Continued on next page



| Dataset      | Model        | Best Epoch | Train Loss | Train Acc. | Val. Loss | Val. Acc. |
|--------------|--------------|------------|------------|------------|-----------|-----------|
| kmnist       | mobilenet_v2 | 89         | 0.036      | 99.988     | 0.095     | 98.468    |
| kmnist       | resnet101    | 90         | 0.020      | 99.993     | 0.097     | 98.147    |
| kmnist       | resnet14     | 73         | 0.021      | 99.975     | 0.070     | 98.748    |
| kmnist       | resnet152    | 85         | 0.020      | 99.988     | 0.090     | 98.197    |
| kmnist       | resnet18     | 73         | 0.020      | 99.997     | 0.077     | 98.628    |
| kmnist       | resnet34     | 83         | 0.018      | 99.998     | 0.081     | 98.538    |
| kmnist       | resnet50     | 80         | 0.020      | 99.982     | 0.097     | 98.067    |
| kmnist       | resnet9      | 54         | 0.008      | 99.997     | 0.069     | 98.528    |
| kmnist       | vgg11_bn     | 62         | 0.016      | 99.998     | 0.078     | 98.427    |
| kmnist       | vgg13_bn     | 54         | 0.016      | 99.980     | 0.069     | 98.698    |
| kmnist       | vgg16_bn     | 79         | 0.015      | 99.998     | 0.070     | 98.698    |
| kmnist       | vgg19_bn     | 99         | 0.015      | 99.998     | 0.078     | 98.518    |
| fashionmnist | alexnet      | 97         | 0.296      | 89.248     | 0.308     | 89.042    |
| fashionmnist | densenet121  | 92         | 0.037      | 99.947     | 0.266     | 93.950    |
| fashionmnist | densenet161  | 93         | 0.038      | 99.937     | 0.264     | 94.171    |
| fashionmnist | densenet169  | 97         | 0.038      | 99.933     | 0.258     | 94.291    |
| fashionmnist | googlenet    | 96         | 0.044      | 99.973     | 0.240     | 93.439    |
| fashionmnist | inception_v3 | 97         | 0.050      | 99.861     | 0.244     | 94.441    |
| fashionmnist | mobilenet_v2 | 98         | 0.040      | 99.913     | 0.252     | 93.860    |
| fashionmnist | resnet101    | 94         | 0.019      | 99.985     | 0.281     | 93.740    |
| fashionmnist | resnet14     | 89         | 0.021      | 99.997     | 0.228     | 94.040    |
| fashionmnist | resnet152    | 91         | 0.020      | 99.970     | 0.286     | 93.770    |
| fashionmnist | resnet18     | 86         | 0.020      | 99.998     | 0.228     | 93.970    |
| fashionmnist | resnet34     | 96         | 0.018      | 99.993     | 0.261     | 93.910    |
| fashionmnist | resnet50     | 89         | 0.019      | 99.985     | 0.261     | 93.810    |
| fashionmnist | resnet9      | 63         | 0.009      | 99.998     | 0.203     | 94.071    |
| fashionmnist | vgg11_bn     | 91         | 0.017      | 100.000    | 0.229     | 93.600    |
| fashionmnist | vgg13_bn     | 80         | 0.017      | 99.998     | 0.211     | 94.111    |
| fashionmnist | vgg16_bn     | 86         | 0.018      | 99.995     | 0.226     | 94.030    |
| fashionmnist | vgg19_bn     | 95         | 0.018      | 99.987     | 0.244     | 93.960    |

Table 3. Description of columns present in the meta data.

| Column                                              | Values       | Description                                                                                                                                                                    |
|-----------------------------------------------------|--------------|--------------------------------------------------------------------------------------------------------------------------------------------------------------------------------|
| model_id                                            | int          | Unique ID of the model.                                                                                                                                                        |
| conv_depth                                          | int          | Convolution depth of the extracted filter i.e. how many convolution layers were hierarchically below the layer, that this filter was extracted from.                           |
| conv_depth_norm                                     | float        | Similar to conv_depth but normalized by the maximum conv_depth. Will be a float between 0 (first layers) ... , 1 (towards head).                                               |
| filter_ids                                          | list of ints | List of Filter IDs that belong to this record. These can directly be mapped to the rows of the filter array.                                                                   |
| model                                               | str          | Unique string ID of the model. Typically, but not reliably in the format {name}-{trainingset}-{onnx opset}.                                                                    |
| producer                                            | str          | Producer of the ONNX export. Typically various versions of PyTorch.                                                                                                            |
| op_set                                              | int          | Version of the ONNX operator set used for export.                                                                                                                              |
| depth                                               | int          | Total hierarchical depth of the model including all layers.                                                                                                                    |
| Name                                                | str          | Name of the model.                                                                                                                                                             |
| Paper                                               | str          | Link to the original publication.                                                                                                                                              |
| Pretraining-Dataset                                 | str          | Name of the pretraining dataset(s) if pretrained. Combined datasets are separated by commas.                                                                                   |
| Training-Dataset                                    | str          | Name of the training dataset(s). Combined datasets are separated by commas.                                                                                                    |
| Visual Category                                     | str          | Visual, manual categorization of the training datasets.                                                                                                                        |
| Task                                                | str          | Task of the model.                                                                                                                                                             |
| Accessible                                          | str          | Represents where the model can be found. Typically, this will be a link to GitHub.                                                                                             |
| Dataset URL                                         | str          | URL of the training dataset. Usually only entered for exotic datasets.                                                                                                         |
| total_filters                                       | int          | Total number of convolution filters in this model.                                                                                                                             |
| (X, Y) filters                                      | int          | Represents frequency of filters with shape (X, Y) were found in the processed model.                                                                                           |
| onnx_operator<br>(e.g. Conv, Add,<br>Relu, MaxPool) | int          | Represents frequency of this particular ONNX operator was found in the processed model. Please note that individual operators may have been fused in later ONNX operator sets. |

Table 4. List of all collected models. Mainly sourced from [2–4]. Where possible, the dataset IDs correspond to the *TensorFlow* naming [5]. Models that start with *hso\_* denote out intentionally overparametrized models (highly sparse and overparametrized).

| Model ID                                                             | Pretraining-Dataset | Training-Dataset(s)              | Task           | Visual Category | $3 \times 3$ Filters |
|----------------------------------------------------------------------|---------------------|----------------------------------|----------------|-----------------|----------------------|
| agripredict_disease_classification_prop.11 [6]                       | -                   | agripredict                      | Classification | plants          | 7232                 |
| cyclegan_horse2zebra_g.11 [7]                                        | -                   | cycle_gan/horse2zebra            | GAN-Generator  | natural         | 1220608              |
| cyclegan_monet2photo_g.11 [7]                                        | -                   | cycle_gan/monet2photo            | GAN-Generator  | art             | 1220608              |
| cyclegan_facades_label2photo_g.11 [7]                                | -                   | cycle_gan/facades                | GAN-Generator  | natural         | 1220608              |
| cyclegan_style_cezanne_g.11 [7]                                      | -                   | cycle_gan/cezanne2photo          | GAN-Generator  | art             | 1220608              |
| cyclegan_summer2winter_yosemite_g.11 [7]                             | -                   | cycle_gan/summer2winter_yosemite | GAN-Generator  | natural         | 1220608              |
| cyclegan_apple2orange_g.11 [7]                                       | -                   | cycle_gan/apple2orange           | GAN-Generator  | natural         | 1220608              |
| cyclegan_cityscapes_photo2label_g.11 [7]                             | -                   | cycle_gan/cityscapes             | GAN-Generator  | natural         | 1220608              |
| cyclegan_zebra2horse_g.11 [7]                                        | -                   | cycle_gan/horse2zebra            | GAN-Generator  | natural         | 1220608              |
| cyclegan_map2sat_g.11 [7]                                            | -                   | cycle_gan/maps                   | GAN-Generator  | map             | 1220608              |
| cyclegan_iphone2dslr_flower_g.11 [7]                                 | -                   | cycle_gan/iphone2dslr_flower     | GAN-Generator  | natural         | 1220608              |
| cyclegan_facades_photo2label_g.11 [7]                                | -                   | cycle_gan/facades                | GAN-Generator  | natural         | 1220608              |
| cyclegan_cityscapes_label2photo_g.11 [7]                             | -                   | cycle_gan/cityscapes             | GAN-Generator  | natural         | 1220608              |
| cyclegan_orange2apple_g.11 [7]                                       | -                   | cycle_gan/apple2orange           | GAN-Generator  | natural         | 1220608              |
| cyclegan_style_ukiyo_e_g.11 [7]                                      | -                   | cycle_gan/ukiyo_e2photo          | GAN-Generator  | art             | 1220608              |
| cyclegan_style_vangogh_g.11 [7]                                      | -                   | cycle_gan/vangogh2photo          | GAN-Generator  | art             | 1220608              |
| cyclegan_winter2summer_yosemite_g.11 [7]                             | -                   | cycle_gan/summer2winter_yosemite | GAN-Generator  | natural         | 1220608              |
| cyclegan_sat2map_g.11 [7]                                            | -                   | cycle_gan/maps                   | GAN-Generator  | map             | 1220608              |
| cyclegan_style_monet_g.11 [7]                                        | -                   | cycle_gan/monet2photo            | GAN-Generator  | art             | 1220608              |
| densenet161_places365.11 [8]                                         | -                   | places365_small                  | Classification | natural         | 718848               |
| ghostnet_1x_imagenet.11 [9]                                          | -                   | imagenet1k                       | Classification | natural         | 4616                 |
| hardnet39ds_imagenet.11 [10]                                         | -                   | imagenet1k                       | Classification | natural         | 3752                 |
| alexnet_places365.11 [8]                                             | -                   | places365_small                  | Classification | natural         | 237568               |
| hardnet68ds_imagenet.11 [10]                                         | -                   | imagenet1k                       | Classification | natural         | 5090                 |
| hardnet68_imagenet.11 [10]                                           | -                   | imagenet1k                       | Classification | natural         | 1680056              |
| hso_lowres_alexnet_cifar10.11 [11]                                   | -                   | cifar10                          | Classification | natural         | 250048               |
| hso_lowres_densenet121_cifar100.11 [12]                              | -                   | cifar100                         | Classification | natural         | 237760               |
| hardnet85_imagenet.11 [10]                                           | -                   | imagenet1k                       | Classification | natural         | 3625760              |
| hso_lowres_alexnet_fashionmnist.11 [11]                              | -                   | fashion_mnist                    | Classification | natural         | 249920               |
| hso_lowres_alexnet_kmnist.11 [11]                                    | -                   | kmnist                           | Classification | handwriting     | 249920               |
| hso_lowres_densenet121_cifar10.11 [12]                               | -                   | cifar10                          | Classification | natural         | 237760               |
| hso_lowres_densenet121_fashionmnist.11 [12]                          | -                   | fashion_mnist                    | Classification | natural         | 237632               |
| hso_lowres_alexnet_mnist.11 [11]                                     | -                   | mnist                            | Classification | handwriting     | 249920               |
| hso_lowres_densenet121_kmnist.11 [12]                                | -                   | kmnist                           | Classification | handwriting     | 237632               |
| hso_lowres_densenet121_mnist.11 [12]                                 | -                   | mnist                            | Classification | handwriting     | 237632               |
| compnet_weights_sagittal_improvement.09_NITRC_IITmean_b0_256.12 [13] | -                   | nitrc_iitmean_b0/256             | Segmentation   | medical ct      | 1842688              |
| compnet_weights_coronal_improvement.08_NITRC_IITmean_b0_256.12 [13]  | -                   | nitrc_iitmean_b0/256             | Segmentation   | medical mri     | 1842688              |

Continued on next page

| Model ID                                                          | Pretraining-Dataset | Training-Dataset     | Task             | Visual Category | 3 × 3 Filters |
|-------------------------------------------------------------------|---------------------|----------------------|------------------|-----------------|---------------|
| compnet_weights_axial_improvement_08_NITRC_IITmean_b0_256.12 [13] | -                   | nitrc_iitmean_b0/256 | Segmentation     | medical mri     | 1842688       |
| hso_lowres_densenet161_cifar100.11 [12]                           | -                   | cifar100             | Classification   | natural         | 719136        |
| hso_lowres_googlenet_cifar100.11 [14]                             | -                   | cifar100             | Classification   | natural         | 356672        |
| hso_lowres_densenet169_fashionmnist.11 [12]                       | -                   | fashion_mnist        | Classification   | natural         | 335936        |
| hso_lowres_densenet169_cifar100.11 [12]                           | -                   | cifar100             | Classification   | natural         | 336064        |
| hso_lowres_googlenet_fashionmnist.11 [14]                         | -                   | fashion_mnist        | Classification   | natural         | 356288        |
| hso_lowres_googlenet_cifar10.11 [14]                              | -                   | cifar10              | Classification   | natural         | 356672        |
| hso_lowres_densenet169_kmnist.11 [12]                             | -                   | kmnist               | Classification   | handwriting     | 335936        |
| hso_lowres_densenet161_cifar10.11 [12]                            | -                   | cifar10              | Classification   | natural         | 719136        |
| hso_lowres_densenet169_cifar10.11 [12]                            | -                   | cifar10              | Classification   | natural         | 336064        |
| hso_lowres_densenet161_fashionmnist.11 [12]                       | -                   | fashion_mnist        | Classification   | natural         | 718944        |
| hso_lowres_densenet169_mnist.11 [12]                              | -                   | mnist                | Classification   | handwriting     | 335936        |
| hso_lowres_densenet161_kmnist.11 [12]                             | -                   | kmnist               | Classification   | handwriting     | 718944        |
| hso_lowres_densenet161_mnist.11 [12]                              | -                   | mnist                | Classification   | handwriting     | 718944        |
| hso_lowres_googlenet_kmnist.11 [14]                               | -                   | kmnist               | Classification   | handwriting     | 356288        |
| hso_lowres_googlenet_mnist.11 [14]                                | -                   | mnist                | Classification   | handwriting     | 356288        |
| facebook_detr_resnet_50_coco2017.12 [15]                          | -                   | coco/2017            | Object Detection | natural         | 1257472       |
| hso_lowres_mobilenet_v2_fashionmnist.11 [16]                      | -                   | fashion_mnist        | Classification   | natural         | 7168          |
| hso_lowres_mobilenet_v2_kmnist.11 [16]                            | -                   | kmnist               | Classification   | handwriting     | 7168          |
| hso_lowres_mobilenet_v2_cifar10.11 [16]                           | -                   | cifar10              | Classification   | natural         | 7232          |
| hso_lowres_mobilenet_v2_cifar100.11 [16]                          | -                   | cifar100             | Classification   | natural         | 7232          |
| hso_lowres_mobilenet_v2_mnist.11 [16]                             | -                   | mnist                | Classification   | handwriting     | 7168          |
| hso_lowres_inception_v3_cifar100.11 [17]                          | -                   | cifar100             | Classification   | natural         | 614976        |
| hso_lowres_inception_v3_cifar10.11 [17]                           | -                   | cifar10              | Classification   | natural         | 614976        |
| hso_lowres_inception_v3_fashionmnist.11 [17]                      | -                   | fashion_mnist        | Classification   | natural         | 614592        |
| hso_lowres_inception_v3_kmnist.11 [17]                            | -                   | kmnist               | Classification   | handwriting     | 614592        |
| hso_lowres_inception_v3_mnist.11 [17]                             | -                   | mnist                | Classification   | handwriting     | 614592        |
| facebook_detr_resnet_50_dc5_panoptic_coco2017.12 [15]             | -                   | coco/2017            | Segmentation     | natural         | 1371728       |
| facebook_detr_resnet_50_panoptic_coco2017.12 [15]                 | -                   | coco/2017            | Segmentation     | natural         | 1371728       |
| facebook_detr_resnet_50_dc5_coco2017.12 [15]                      | -                   | coco/2017            | Object Detection | natural         | 1257472       |
| hso_lowres_resnet101_cifar100.11 [18]                             | -                   | cifar100             | Classification   | natural         | 2371776       |
| hso_lowres_resnet14_cifar100.11 [18]                              | -                   | cifar100             | Classification   | natural         | 303296        |
| hso_lowres_resnet101_cifar10.11 [18]                              | -                   | cifar10              | Classification   | natural         | 2371776       |
| hso_lowres_resnet14_cifar10.11 [18]                               | -                   | cifar10              | Classification   | natural         | 303296        |
| hso_lowres_resnet14_fashionmnist.11 [18]                          | -                   | fashion_mnist        | Classification   | natural         | 303168        |
| hso_lowres_resnet14_kmnist.11 [18]                                | -                   | kmnist               | Classification   | handwriting     | 303168        |
| hso_lowres_resnet101_fashionmnist.11 [18]                         | -                   | fashion_mnist        | Classification   | natural         | 2371648       |
| hso_lowres_resnet14_mnist.11 [18]                                 | -                   | mnist                | Classification   | handwriting     | 303168        |
| hso_lowres_resnet101_kmnist.11 [18]                               | -                   | kmnist               | Classification   | handwriting     | 2371648       |
| hso_lowres_resnet101_mnist.11 [18]                                | -                   | mnist                | Classification   | handwriting     | 2371648       |
| hso_lowres_resnet152_cifar100.11 [18]                             | -                   | cifar100             | Classification   | natural         | 3289280       |
| hso_lowres_resnet18_cifar100.11 [18]                              | -                   | cifar100             | Classification   | natural         | 1220800       |
| hso_lowres_resnet152_cifar10.11 [18]                              | -                   | cifar10              | Classification   | natural         | 3289280       |
| hso_lowres_resnet18_cifar10.11 [18]                               | -                   | cifar10              | Classification   | natural         | 1220800       |
| hso_lowres_resnet18_fashionmnist.11 [18]                          | -                   | fashion_mnist        | Classification   | natural         | 1220672       |
| hso_lowres_resnet18_kmnist.11 [18]                                | -                   | kmnist               | Classification   | handwriting     | 1220672       |
| hso_lowres_resnet152_fashionmnist.11 [18]                         | -                   | fashion_mnist        | Classification   | natural         | 3289152       |
| hso_lowres_resnet152_mnist.11 [18]                                | -                   | mnist                | Classification   | handwriting     | 3289152       |
| hso_lowres_resnet152_kmnist.11 [18]                               | -                   | kmnist               | Classification   | handwriting     | 3289152       |
| hso_lowres_resnet18_mnist.11 [18]                                 | -                   | mnist                | Classification   | handwriting     | 1220672       |
| hso_lowres_resnet34_cifar100.11 [18]                              | -                   | cifar100             | Classification   | natural         | 2343104       |
| hso_lowres_resnet34_cifar10.11 [18]                               | -                   | cifar10              | Classification   | natural         | 2343104       |
| hso_lowres_resnet34_mnist.11 [18]                                 | -                   | mnist                | Classification   | handwriting     | 2342976       |
| hso_lowres_resnet34_fashionmnist.11 [18]                          | -                   | fashion_mnist        | Classification   | natural         | 2342976       |
| hso_lowres_resnet34_kmnist.11 [18]                                | -                   | kmnist               | Classification   | handwriting     | 2342976       |
| hso_lowres_resnet50_cifar100.11 [18]                              | -                   | cifar100             | Classification   | natural         | 1257664       |
| hso_lowres_resnet50_cifar10.11 [18]                               | -                   | cifar10              | Classification   | natural         | 1257664       |
| hso_lowres_resnet50_fashionmnist.11 [18]                          | -                   | fashion_mnist        | Classification   | natural         | 1257536       |
| hso_lowres_resnet50_kmnist.11 [18]                                | -                   | kmnist               | Classification   | handwriting     | 1257536       |
| hso_lowres_resnet50_mnist.11 [18]                                 | -                   | mnist                | Classification   | handwriting     | 1257536       |

Continued on next page

| Model ID                                            | Pretraining-Dataset | Training-Dataset                                                               | Task             | Visual Category | $3 \times 3$ Filters |
|-----------------------------------------------------|---------------------|--------------------------------------------------------------------------------|------------------|-----------------|----------------------|
| hso_lowres_resnet9_cifar100_11 [18]                 | -                   | cifar100                                                                       | Classification   | natural         | 729280               |
| hso_lowres_resnet9_cifar10_11 [18]                  | -                   | cifar10                                                                        | Classification   | natural         | 729280               |
| hso_lowres_resnet9_fashionmnist_11 [18]             | -                   | fashion_mnist                                                                  | Classification   | natural         | 729152               |
| hso_lowres_resnet9_kmnist_11 [18]                   | -                   | kmnist                                                                         | Classification   | handwriting     | 729152               |
| hso_lowres_resnet9_mnist_11 [18]                    | -                   | mnist                                                                          | Classification   | handwriting     | 729152               |
| hso_lowres_vgg11_bn_cifar10_11 [19]                 | -                   | cifar10                                                                        | Classification   | natural         | 1024192              |
| hso_lowres_vgg11_bn_cifar100_11 [19]                | -                   | cifar100                                                                       | Classification   | natural         | 1024192              |
| hso_lowres_vgg11_bn_fashionmnist_11 [19]            | -                   | fashion_mnist                                                                  | Classification   | natural         | 1024064              |
| hso_lowres_vgg11_bn_kmnist_11 [19]                  | -                   | kmnist                                                                         | Classification   | handwriting     | 1024064              |
| hso_lowres_vgg11_bn_mnist_11 [19]                   | -                   | mnist                                                                          | Classification   | handwriting     | 1024064              |
| hso_lowres_vgg13_bn_cifar100_11 [19]                | -                   | cifar100                                                                       | Classification   | natural         | 1044672              |
| hso_lowres_vgg13_bn_cifar10_11 [19]                 | -                   | cifar10                                                                        | Classification   | natural         | 1044672              |
| hso_lowres_vgg13_bn_fashionmnist_11 [19]            | -                   | fashion_mnist                                                                  | Classification   | natural         | 1044544              |
| hso_lowres_vgg13_bn_kmnist_11 [19]                  | -                   | kmnist                                                                         | Classification   | handwriting     | 1044544              |
| hso_lowres_vgg13_bn_mnist_11 [19]                   | -                   | mnist                                                                          | Classification   | handwriting     | 1044544              |
| hso_lowres_vgg16_bn_fashionmnist_11 [19]            | -                   | fashion_mnist                                                                  | Classification   | natural         | 1634368              |
| hso_lowres_vgg16_bn_cifar100_11 [19]                | -                   | cifar100                                                                       | Classification   | natural         | 1634496              |
| hso_lowres_vgg16_bn_cifar10_11 [19]                 | -                   | cifar10                                                                        | Classification   | natural         | 1634496              |
| hso_lowres_vgg16_bn_kmnist_11 [19]                  | -                   | kmnist                                                                         | Classification   | handwriting     | 1634368              |
| hso_lowres_vgg16_bn_mnist_11 [19]                   | -                   | mnist                                                                          | Classification   | handwriting     | 1634368              |
| hso_lowres_vgg19_bn_cifar100_11 [19]                | -                   | cifar100                                                                       | Classification   | natural         | 2224320              |
| hso_lowres_vgg19_bn_cifar10_11 [19]                 | -                   | cifar10                                                                        | Classification   | natural         | 2224320              |
| hso_lowres_vgg19_bn_fashionmnist_11 [19]            | -                   | fashion_mnist                                                                  | Classification   | natural         | 2224192              |
| hso_lowres_vgg19_bn_kmnist_11 [19]                  | -                   | kmnist                                                                         | Classification   | handwriting     | 2224192              |
| hso_lowres_vgg19_bn_mnist_11 [19]                   | -                   | mnist                                                                          | Classification   | handwriting     | 2224192              |
| lungmask_unet_LTRCLobes_11 [20]                     | -                   | ltrc                                                                           | Segmentation     | medical ct      | 3137600              |
| lungmask_unet_R231CovidWeb_11 [20]                  | -                   | r231, covidweb                                                                 | Segmentation     | medical ct      | 3137600              |
| lungmask_unet_R231_11 [20]                          | -                   | r231                                                                           | Segmentation     | medical ct      | 3137600              |
| mealv1_resnest50_imagenet_11 [21]                   | -                   | imagenet1k                                                                     | Classification   | natural         | 1257472              |
| mealv2_efficientnet_b0_imagenet_11 [21]             | -                   | imagenet1k                                                                     | Classification   | natural         | 2720                 |
| mealv2_mobilenet_v3_large_100_imagenet_11 [21]      | -                   | imagenet1k                                                                     | Classification   | natural         | 2160                 |
| mealv2_mobilenetv3_small_075_imagenet_11 [21]       | -                   | imagenet1k                                                                     | Classification   | natural         | 224                  |
| mealv2_mobilenetv3_small_100_imagenet_11 [21]       | -                   | imagenet1k                                                                     | Classification   | natural         | 224                  |
| mealv2_resnest50_380x380_imagenet_11 [21]           | -                   | imagenet1k                                                                     | Classification   | natural         | 1257472              |
| mealv2_resnest50_cutmix_imagenet_11 [21]            | -                   | imagenet1k                                                                     | Classification   | natural         | 1257472              |
| mealv2_resnest50_imagenet_11 [21]                   | -                   | imagenet1k                                                                     | Classification   | natural         | 1257472              |
| candy-9 [22]                                        | -                   | coco/2014                                                                      | Style Transfer   | natural         | 184320               |
| midas_small_redweb_diml_movies_megadepth_wsvd_      | -                   | redweb,                                                                        | Depth Estimation | depth           | 1115680              |
| tartanair_hrws_i_apolloscape_blendedmvs_irs_11 [23] | -                   | diml, movies, megadepth, wsvd, tartanair, hrws_i, apolloscape, blendedmvs, irs |                  |                 |                      |
| efficientnet-lite4-11 [24]                          | -                   | coco/2017                                                                      | Classification   | natural         | 6176                 |
| ntsnet_cub2002011_11 [25]                           | -                   | caltech_birds2011                                                              | Classification   | natural         | 2809856              |
| mosaic-9 [22]                                       | -                   | coco/2014                                                                      | Style Transfer   | natural         | 184320               |
| age_googlenet [26]                                  | -                   | adience                                                                        | Classification   | natural         | 344576               |
| pointilism-9 [22]                                   | -                   | coco/2014                                                                      | Style Transfer   | natural         | 184320               |
| emotion-ferplus-8 [27]                              | -                   | ferplus                                                                        | Classification   | faces           | 389184               |
| rain-princess-9 [22]                                | -                   | coco/2014                                                                      | Style Transfer   | natural         | 184320               |
| gender_googlenet [26]                               | -                   | adience                                                                        | Face Detection   | faces           | 344576               |
| midas_redweb_diml_movies_megadepth_wsvd_            | -                   | redweb,                                                                        | Depth Estimation | depth           | 3123200              |
| tartanair_hrws_i_apolloscape_blendedmvs_irs_11 [23] | -                   | diml, movies, megadepth, wsvd, tartanair, hrws_i, apolloscape, blendedmvs, irs |                  |                 |                      |
| ssd-10 [28]                                         | -                   | coco/2017                                                                      | Object Detection | natural         | 2175488              |
| ssd_mobilenet_v1_10 [29]                            | -                   | coco/2017                                                                      | Object Detection | natural         | 209856               |

Continued on next page

| Model ID                                                             | Pretraining-Dataset | Training-Dataset                 | Task              | Visual Category | $3 \times 3$ Filters |
|----------------------------------------------------------------------|---------------------|----------------------------------|-------------------|-----------------|----------------------|
| super-resolution-10 [30]                                             | -                   | bsd300                           | Super Resolution  | natural         | 6432                 |
| retinanet-9 [31]                                                     | -                   | imagenet1k                       | Object Detection  | natural         | 6747136              |
| udnie-9 [22]                                                         | -                   | coco/2014                        | Style Transfer    | natural         | 184320               |
| version-RFB-320 [32]                                                 | -                   | wider_                           | Face Detection    | faces           | 7872                 |
|                                                                      |                     | face/cleaned                     |                   |                 |                      |
| version-RFB-640 [32]                                                 | -                   | wider_face                       | Object Detection  | faces           | 7872                 |
| tiny-yolov3-11 [33]                                                  | -                   | coco/2017                        | Object Detection  | natural         | 928304               |
| pgan_celeba_cropped_disc_11 [34]                                     | -                   | celeb_a/128_cropped              | GAN-Discriminator | faces           | 2081280              |
| yolov2-coco-9 [35]                                                   | -                   | coco/2014                        | Object Detection  | natural         | 5458016              |
| pgan_celeba_cropped_gen_11 [34]                                      | -                   | celeb_a/128_cropped              | GAN-Generator     | faces           | 2080768              |
| pgan_celebahq_256_disc_11 [34]                                       | -                   | celeb_a_hq/256                   | GAN-Discriminator | faces           | 2093568              |
| yolov4 [36]                                                          | -                   | coco/2017                        | Object Detection  | natural         | 5951584              |
| yolov3-10 [33]                                                       | -                   | coco/2017                        | Object Detection  | natural         | 6189152              |
| tinyyolov2-8 [35]                                                    | -                   | voc/2007, voc/2012               | Object Detection  | natural         | 1747504              |
| pgan_celebahq_256_gen_11 [34]                                        | -                   | celeb_a_hq/256                   | GAN-Generator     | faces           | 2093056              |
| zfnet512-9 [37]                                                      | -                   | imagenet1k                       | Classification    | natural         | 655360               |
| pgan_celebahq_512_disc_11 [34]                                       | -                   | celeb_a_hq/512                   | GAN-Discriminator | faces           | 2096640              |
| pgan_celebahq_512_gen_11 [34]                                        | -                   | celeb_a_hq/512                   | GAN-Generator     | faces           | 2096128              |
| pgan_dtd_disc_11 [34]                                                | -                   | dtd                              | GAN-Discriminator | textures        | 2081280              |
| pgan_dtd_gen_11 [34]                                                 | -                   | dtd                              | GAN-Generator     | textures        | 2080768              |
| vgg_ilsvrc_16_age_chalearn_iccv2015 [26]                             | -                   | chalearn_lap_2015                | Face Detection    | faces           | 1634496              |
| vgg_ilsvrc_16_age_imdb_wiki [26]                                     | -                   | imdb_wiki                        | Face Detection    | faces           | 1634496              |
| vgg_ilsvrc_16_gender_imdb_wiki [26]                                  | -                   | imdb_wiki                        | Classification    | faces           | 1634496              |
| pytorchencoding_deeplab_resnest50_pcontext_11 [38]                   | -                   | voc/2010                         | Segmentation      | natural         | 3161184              |
| pytorchencoding_deeplab_resnest101_ade_11 [38]                       | -                   | ade20k                           | Segmentation      | natural         | 4284608              |
| arcfaceresnet100-8 [39]                                              | -                   | refined_ms_                      | Face Recognition  | faces           | 5783744              |
|                                                                      |                     | celeb_1m                         |                   |                 |                      |
| pytorchencoding_deeplab_resnest50_ade_11 [38]                        | -                   | ade20k                           | Segmentation      | natural         | 3161184              |
| pytorchencoding_fcn_resnest50_ade_11 [38]                            | -                   | ade20k                           | Segmentation      | natural         | 2571360              |
| pytorchencoding_deeplab_resnest101_pcontext_11 [38]                  | -                   | voc/2010                         | Segmentation      | natural         | 4284608              |
| pytorchencoding_fcn_resnest50_pcontext_11 [38]                       | -                   | voc/2010                         | Segmentation      | natural         | 2571360              |
| pytorchencoding_fcn_resnet50s_ade_11 [38]                            | -                   | ade20k                           | Segmentation      | natural         | 2580672              |
| resnet18_places365_11 [8]                                            | -                   | places365_small                  | Classification    | natural         | 1220608              |
| ResNet101-DUC-7 [40]                                                 | -                   | cityscapes/semantic_segmentation | Segmentation      | natural         | 4874432              |
| realesrganx4_custom_11 [41]                                          | -                   | sberbank_                        | Super Resolution  | natural         | 1853824              |
|                                                                      |                     | realesrgan                       |                   |                 |                      |
| resnet50_fractalDB1k_11 [42]                                         | -                   | fractal_db_1k                    | Classification    | fractals        | 1257472              |
| robustbench_addepalli2021towards_parn18_corruptions_cifar100_11 [43] | -                   | cifar100                         | Classification    | natural         | 1220800              |
| resnet50_fractalDB10k_11 [42]                                        | -                   | fractal_db_10k                   | Classification    | fractals        | 1257472              |
| robustbench_addepalli2021towards_parn18_linf_cifar100_11 [43]        | -                   | cifar100                         | Classification    | natural         | 1220800              |
| resnet50_places365_11 [8]                                            | -                   | places365_small                  | Classification    | natural         | 1257472              |
| robustbench_addepalli2021towards_rn18_linf_cifar10_11 [43]           | -                   | cifar10                          | Classification    | natural         | 1220800              |
| realesrganx8_custom_11 [41]                                          | -                   | sberbank_                        | Super Resolution  | natural         | 1857920              |
|                                                                      |                     | realesrgan                       |                   |                 |                      |
| robustbench_andriushchenko2020understanding_linf_cifar10_11 [44]     | -                   | cifar10                          | Classification    | natural         | 1220800              |
| robustbench_addepalli2021towards_wrn34_corruptions_cifar100_11 [43]  | -                   | cifar100                         | Classification    | natural         | 5097008              |
| robustbench_addepalli2021towards_wrn34_linf_cifar100_11 [43]         | -                   | cifar100                         | Classification    | natural         | 5097008              |

Continued on next page

| Model ID                                                                | Pretraining-Dataset | Training-Dataset             | Task             | Visual Category | 3 × 3 Filters |
|-------------------------------------------------------------------------|---------------------|------------------------------|------------------|-----------------|---------------|
| robustbench_augustin2020adversarial_l2_cifar10_11 [45]                  | -                   | cifar10                      | Classification   | natural         | 1257664       |
| pytorchencoding_deeplab_resnest200_ade_11 [38]                          | -                   | ade20k                       | Segmentation     | natural         | 5464256       |
| robustbench_augustin2020adversarial_34_10_extra_l2_cifar10_11 [45]      | -                   | cifar10                      | Classification   | natural         | 5097008       |
| pytorchencoding_deeplab_resnest200_pcontext_11 [38]                     | -                   | voc/2010                     | Segmentation     | natural         | 5464256       |
| robustbench_augustin2020adversarial_34_10_l2_cifar10_11 [45]            | -                   | cifar10                      | Classification   | natural         | 5097008       |
| robustbench_carmon2019unlabeled_linf_cifar10_11 [46]                    | -                   | cifar10                      | Classification   | natural         | 4021808       |
| robustbench_chen2020efficient_linf_cifar100_11 [47]                     | -                   | cifar100                     | Classification   | natural         | 5097008       |
| robustbench_chen2020efficient_linf_cifar10_11 [47]                      | -                   | cifar10                      | Classification   | natural         | 5097008       |
| robustbench_chen2020adversarial_linf_cifar10_11 [48]                    | -                   | cifar10                      | Classification   | natural         | 3772992       |
| robustbench_cui2020learnable_34_10_lbgat6_linf_cifar100_11 [49]         | -                   | cifar100                     | Classification   | natural         | 5097008       |
| robustbench_cui2020learnable_34_10_linf_cifar10_11 [49]                 | -                   | cifar10                      | Classification   | natural         | 5097008       |
| realesrganx2_custom_11 [41]                                             | -                   | sberbank_realesrgan_cifar100 | Super Resolution | natural         | 1854400       |
| robustbench_diffenderfer2021winning_binary_corruptions_cifar100_11 [50] | -                   | cifar100                     | Classification   | natural         | 2719936       |
| robustbench_ding2020mma_l2_cifar10_11 [51]                              | -                   | cifar10                      | Classification   | natural         | 644144        |
| robustbench_diffenderfer2021winning_lrr_corruptions_cifar100_11 [50]    | -                   | cifar100                     | Classification   | natural         | 4882816       |
| robustbench_ding2020mma_linf_cifar10_11 [51]                            | -                   | cifar10                      | Classification   | natural         | 644144        |
| robustbench_engstrom2019robustness_l2_cifar10_11 [52]                   | -                   | cifar10                      | Classification   | natural         | 1257664       |
| pytorchencoding_deeplab_resnest269_ade_11 [38]                          | -                   | ade20k                       | Segmentation     | natural         | 7659712       |
| robustbench_cui2020learnable_34_20_lbgat6_linf_cifar100_11 [49]         | -                   | cifar100                     | Classification   | natural         | 20382768      |
| robustbench_engstrom2019robustness_linf_cifar10_11 [52]                 | -                   | cifar10                      | Classification   | natural         | 1257664       |
| pytorchencoding_deeplab_resnest269_pcontext_11 [38]                     | -                   | voc/2010                     | Segmentation     | natural         | 7659712       |
| robustbench_engstrom2019robustness_linf_imagenet_11 [52]                | -                   | imagenet1k                   | Classification   | natural         | 1257472       |
| robustbench_cui2020learnable_34_20_linf_cifar10_11 [49]                 | -                   | cifar10                      | Classification   | natural         | 20382768      |
| robustbench_geirhos2018_sin_corruptions_imagenet_11 [53]                | -                   | imagenet1k                   | Classification   | natural         | 1257472       |
| robustbench_geirhos2018_sin_in_corruptions_imagenet_11 [53]             | -                   | imagenet1k                   | Classification   | natural         | 1257472       |
| robustbench_gowal2020uncovering_28_10_extra_linf_cifar10_11 [54]        | -                   | cifar10                      | Classification   | natural         | 4021808       |
| robustbench_hendrycks2019using_linf_cifar100_11 [55]                    | -                   | cifar100                     | Classification   | natural         | 4021808       |
| robustbench_gowal2020uncovering_34_20_linf_cifar10_11 [54]              | -                   | cifar10                      | Classification   | natural         | 20382768      |
| robustbench_hendrycks2019using_linf_cifar10_11 [55]                     | -                   | cifar10                      | Classification   | natural         | 4021808       |
| robustbench_gowal2020uncovering_70_16_extra_linf_cifar10_11 [54]        | -                   | cifar10                      | Classification   | natural         | 29560880      |
| robustbench_hendrycks2020augmix_resnext_corruptions_cifar100_11 [56]    | -                   | cifar100                     | Classification   | natural         | 258240        |
| robustbench_hendrycks2020augmix_corruptions_imagenet_11 [56]            | -                   | imagenet1k                   | Classification   | natural         | 1257472       |
| robustbench_gowal2020uncovering_70_16_linf_cifar10_11 [54]              | -                   | cifar10                      | Classification   | natural         | 29560880      |
| robustbench_hendrycks2020augmix_resnext_corruptions_cifar10_11 [56]     | -                   | cifar10                      | Classification   | natural         | 258240        |

Continued on next page

| Model ID                                                                        | Pretraining-Dataset | Training-Dataset | Task           | Visual Category | $3 \times 3$ Filters |
|---------------------------------------------------------------------------------|---------------------|------------------|----------------|-----------------|----------------------|
| robustbench_gowal2020uncovering_extra_l2_cifar10_11 [54]                        | -                   | cifar10          | Classification | natural         | 29560880             |
| robustbench_gowal2020uncovering_extra_linf_cifar100_11 [54]                     | -                   | cifar100         | Classification | natural         | 29560880             |
| robustbench_hendrycks2020augmix_wrn_corruptions_cifar100_11 [56]                | -                   | cifar100         | Classification | natural         | 247344               |
| robustbench_gowal2020uncovering_l2_cifar10_11 [54]                              | -                   | cifar10          | Classification | natural         | 29560880             |
| robustbench_gowal2020uncovering_extra_linf_corruptions_cifar100_11 [54]         | -                   | cifar100         | Classification | natural         | 29560880             |
| robustbench_hendrycks2020augmix_wrn_corruptions_cifar10_11 [56]                 | -                   | cifar10          | Classification | natural         | 247344               |
| robustbench_gowal2020uncovering_linf_corruptions_cifar100_11 [54]               | -                   | cifar100         | Classification | natural         | 29560880             |
| robustbench_hendrycks2020many_corruptions_imagenet_11 [57]                      | -                   | imagenet1k       | Classification | natural         | 1257472              |
| robustbench_huang2020self_linf_cifar10_11 [58]                                  | -                   | cifar10          | Classification | natural         | 5097008              |
| robustbench_kireev2021effectiveness_augmixnojsd_corruptions_cifar10_11 [59]     | -                   | cifar10          | Classification | natural         | 1220800              |
| robustbench_kireev2021effectiveness_gauss50percent_corruptions_cifar10_11 [59]  | -                   | cifar10          | Classification | natural         | 1220800              |
| robustbench_kireev2021effectiveness_rlat_corruptions_cifar10_11 [59]            | -                   | cifar10          | Classification | natural         | 1220800              |
| robustbench_huang2021exploring_ema_linf_cifar10_11 [60]                         | -                   | cifar10          | Classification | natural         | 7504944              |
| robustbench_kireev2021effectiveness_rlataugmix_corruptions_cifar10_11 [59]      | -                   | cifar10          | Classification | natural         | 1220800              |
| robustbench_huang2021exploring_linf_cifar10_11 [60]                             | -                   | cifar10          | Classification | natural         | 7504944              |
| robustbench_kireev2021effectiveness_rlataugmixnojsd_corruptions_cifar10_11 [59] | -                   | cifar10          | Classification | natural         | 1220800              |
| robustbench_rade2021helper_ddpm_linf_cifar10_11 [61]                            | -                   | cifar10          | Classification | natural         | 4021808              |
| robustbench_rade2021helper_extra_linf_cifar10_11 [61]                           | -                   | cifar10          | Classification | natural         | 5097008              |
| robustbench_rade2021helper_r18_ddpm_linf_cifar100_11 [61]                       | -                   | cifar100         | Classification | natural         | 1392832              |
| robustbench_pang2020boosting_linf_cifar10_11 [62]                               | -                   | cifar10          | Classification | natural         | 20382768             |
| robustbench_rade2021helper_r18_ddpm_linf_cifar10_11 [61]                        | -                   | cifar10          | Classification | natural         | 1392832              |
| robustbench_rade2021helper_r18_extra_linf_cifar10_11 [61]                       | -                   | cifar10          | Classification | natural         | 1392832              |
| robustbench_rebuffi2021fixing_28_10_cutmix_ddpm_l2_cifar10_11 [63]              | -                   | cifar10          | Classification | natural         | 4021808              |
| robustbench_rebuffi2021fixing_28_10_cutmix_ddpm_linf_cifar100_11 [63]           | -                   | cifar100         | Classification | natural         | 4021808              |
| robustbench_rebuffi2021fixing_28_10_cutmix_ddpm_linf_cifar10_11 [63]            | -                   | cifar10          | Classification | natural         | 4021808              |
| robustbench_rebuffi2021fixing_70_16_cutmix_ddpm_l2_cifar10_11 [63]              | -                   | cifar10          | Classification | natural         | 29560880             |
| robustbench_rebuffi2021fixing_106_16_cutmix_ddpm_linf_cifar10_11 [63]           | -                   | cifar10          | Classification | natural         | 46075952             |
| robustbench_rebuffi2021fixing_70_16_cutmix_ddpm_linf_cifar100_11 [63]           | -                   | cifar100         | Classification | natural         | 29560880             |
| robustbench_rebuffi2021fixing_r18_cutmix_ddpm_l2_cifar10_11 [63]                | -                   | cifar10          | Classification | natural         | 1392832              |
| robustbench_rebuffi2021fixing_r18_ddpm_linf_cifar100_11 [63]                    | -                   | cifar100         | Classification | natural         | 1392832              |
| robustbench_rebuffi2021fixing_70_16_cutmix_extra_l2_cifar10_11 [63]             | -                   | cifar10          | Classification | natural         | 29560880             |
| robustbench_rebuffi2021fixing_70_16_cutmix_ddpm_linf_cifar10_11 [63]            | -                   | cifar10          | Classification | natural         | 29560880             |

Continued on next page



| Model ID                                                              | Pretraining-Dataset | Training-Dataset | Task              | Visual Category | $3 \times 3$ Filters |
|-----------------------------------------------------------------------|---------------------|------------------|-------------------|-----------------|----------------------|
| robustbench_rebuffi2021fixing_70_16_cutmix_extra_linf_cifar10_11 [63] | -                   | cifar10          | Classification    | natural         | 29560880             |
| robustbench_rebuffi2021fixing_r18_ddpm_linf_cifar10_11 [63]           | -                   | cifar10          | Classification    | natural         | 1392832              |
| robustbench_rice2020overfitting_l2_cifar10_11 [64]                    | -                   | cifar10          | Classification    | natural         | 1220800              |
| robustbench_rice2020overfitting_linf_cifar100_11 [64]                 | -                   | cifar100         | Classification    | natural         | 1220800              |
| robustbench_rony2019decoupling_l2_cifar10_11 [65]                     | -                   | cifar10          | Classification    | natural         | 4021808              |
| robustbench_salman2020do_50_2_linf_corruptions_imagenet_11 [66]       | -                   | imagenet1k       | Classification    | natural         | 5029888              |
| robustbench_rice2020overfitting_linf_cifar10_11 [64]                  | -                   | cifar10          | Classification    | natural         | 20382768             |
| robustbench_salman2020do_r18_linf_imagenet_11 [66]                    | -                   | imagenet1k       | Classification    | natural         | 1220608              |
| robustbench_salman2020do_50_2_linf_imagenet_11 [66]                   | -                   | imagenet1k       | Classification    | natural         | 5029888              |
| robustbench_salman2020do_r50_linf_imagenet_11 [66]                    | -                   | imagenet1k       | Classification    | natural         | 1257472              |
| robustbench_sehwag2020hydra_linf_cifar10_11 [67]                      | -                   | cifar10          | Classification    | natural         | 4021808              |
| robustbench_sehwag2021proxy_l2_cifar10_11 [68]                        | -                   | cifar10          | Classification    | natural         | 5097008              |
| robustbench_sehwag2021proxy_r18_l2_cifar10_11 [68]                    | -                   | cifar10          | Classification    | natural         | 1220800              |
| robustbench_sehwag2021proxy_linf_cifar10_11 [68]                      | -                   | cifar10          | Classification    | natural         | 5097008              |
| robustbench_sehwag2021proxy_r18_linf_cifar10_11 [68]                  | -                   | cifar10          | Classification    | natural         | 1220800              |
| robustbench_sitawarin2020improving_linf_cifar100_11 [69]              | -                   | cifar100         | Classification    | natural         | 5097008              |
| robustbench_sitawarin2020improving_linf_cifar10_11 [69]               | -                   | cifar10          | Classification    | natural         | 5097008              |
| robustbench_sridhar2021robust_linf_cifar10_11 [70]                    | -                   | cifar10          | Classification    | natural         | 4021808              |
| robustbench_sridhar2021robust_34_15_linf_cifar10_11 [70]              | -                   | cifar10          | Classification    | natural         | 11466288             |
| robustbench_wang2020improving_linf_cifar10_11 [71]                    | -                   | cifar10          | Classification    | natural         | 4021808              |
| robustbench_wong2020fast_linf_cifar10_11 [72]                         | -                   | cifar10          | Classification    | natural         | 1220800              |
| robustbench_wong2020fast_linf_imagenet_11 [72]                        | -                   | imagenet1k       | Classification    | natural         | 1257472              |
| robustbench_wu2020adversarial_extra_linf_cifar10_11 [73]              | -                   | cifar10          | Classification    | natural         | 4021808              |
| robustbench_wu2020adversarial_l2_cifar10_11 [73]                      | -                   | cifar10          | Classification    | natural         | 5097008              |
| robustbench_wu2020adversarial_linf_cifar100_11 [73]                   | -                   | cifar100         | Classification    | natural         | 5097008              |
| robustbench_wu2020adversarial_linf_cifar10_11 [73]                    | -                   | cifar10          | Classification    | natural         | 5097008              |
| robustbench_zhang2019theoretically_linf_cifar10_11 [74]               | -                   | cifar10          | Classification    | natural         | 5097008              |
| robustbench_zhang2019you_linf_cifar10_11 [75]                         | -                   | cifar10          | Classification    | natural         | 5097008              |
| robustbench_zhang2020geometry_linf_cifar10_11 [76]                    | -                   | cifar10          | Classification    | natural         | 4021808              |
| robustbench_zhang2020attacks_linf_cifar10_11 [77]                     | -                   | cifar10          | Classification    | natural         | 5097008              |
| seismicdeeplearning_dutchf3_hrnet_patch_patch_depth_11 [78]           | imagenet1k          | dutch_f3         | Segmentation      | seismic         | 7165376              |
| seismicdeeplearning_dutchf3_hrnet_patch_section_depth_11 [78]         | imagenet1k          | dutch_f3         | Segmentation      | seismic         | 7165376              |
| seismicdeeplearning_dutchf3_seresnetunet_patch_section_depth_11 [78]  | -                   | dutch_f3         | Segmentation      | seismic         | 2760704              |
| starnet_Greyscale_gan_d_prop_9 [79]                                   | -                   | starnet          | GAN-Discriminator | astronomy       | 196640               |
| stackganv2_imagenet_11 [80]                                           | -                   | imagenet1k/dog   | GAN-Generator     | natural         | 1458256              |
| starnet_RGB_gan_d_prop_9 [79]                                         | -                   | starnet          | GAN-Discriminator | astronomy       | 196704               |
| seismicdeeplearning_penobscot_hrnet_patch_section_depth_11 [78]       | imagenet1k          | penobscot        | Segmentation      | seismic         | 7165376              |
| stylegan_flickerhq_1024_disc_11 [81]                                  | -                   | ff_hq/1024       | GAN-Discriminator | faces           | 2097408              |

Continued on next page

| Model ID                                          | Pretraining-Dataset | Training-Dataset | Task             | Visual Category | $3 \times 3$ Filters |
|---------------------------------------------------|---------------------|------------------|------------------|-----------------|----------------------|
| timm_adv_inception_v3_imagenet.11 [82]            | -                   | imagenet1k       | Classification   | natural         | 632928               |
| taskconditioned_kaist.11 [83]                     | -                   | kaist            | Object Detection | thermal         | 6189152              |
| timm_coat_lite_mini_imagenet.11 [84]              | -                   | imagenet1k       | Classification   | natural         | 2560                 |
| stylegan_flickerhq_1024_gen.11 [81]               | -                   | ff_hq/1024       | GAN-Generator    | faces           | 2096896              |
| timm_coat_lite_tiny_imagenet.11 [84]              | -                   | imagenet1k       | Classification   | natural         | 1920                 |
| timm_cspdarknet53_imagenet.11 [85]                | -                   | imagenet1k       | Classification   | natural         | 2412640              |
| timm_coat_lite_small_imagenet.11 [84]             | -                   | imagenet1k       | Classification   | natural         | 5200                 |
| timm_cspresnet50_imagenet.11 [85]                 | -                   | imagenet1k       | Classification   | natural         | 1257472              |
| timm_cspresnext50_imagenet.11 [85]                | -                   | imagenet1k       | Classification   | natural         | 157184               |
| timm_densenet121_imagenet.11 [12]                 | -                   | imagenet1k       | Classification   | natural         | 237568               |
| timm_coat_mini_imagenet.11 [84]                   | -                   | imagenet1k       | Classification   | natural         | 6860                 |
| timm_dla102_imagenet.11 [86]                      | -                   | imagenet1k       | Classification   | natural         | 1712896              |
| timm_coat_tiny_imagenet.11 [84]                   | -                   | imagenet1k       | Classification   | natural         | 4940                 |
| timm_dla102x2_imagenet.11 [86]                    | -                   | imagenet1k       | Classification   | natural         | 428800               |
| timm_dla102x_imagenet.11 [86]                     | -                   | imagenet1k       | Classification   | natural         | 214784               |
| timm_dla34_imagenet.11 [86]                       | -                   | imagenet1k       | Classification   | natural         | 1547008              |
| timm_dla46_c_imagenet.11 [86]                     | -                   | imagenet1k       | Classification   | natural         | 56064                |
| timm_dla169_imagenet.11 [86]                      | -                   | imagenet1k       | Classification   | natural         | 2769664              |
| timm_dla46x_c_imagenet.11 [86]                    | -                   | imagenet1k       | Classification   | natural         | 7680                 |
| timm_dla60_imagenet.11 [86]                       | -                   | imagenet1k       | Classification   | natural         | 1123072              |
| timm_dla60_res2net_imagenet.11 [87]               | -                   | imagenet1k       | Classification   | natural         | 645216               |
| timm_dla60_res2next_imagenet.11 [87]              | -                   | imagenet1k       | Classification   | natural         | 105984               |
| timm_dla60x_c_imagenet.11 [86]                    | -                   | imagenet1k       | Classification   | natural         | 9728                 |
| timm_dla60x_imagenet.11 [86]                      | -                   | imagenet1k       | Classification   | natural         | 141056               |
| timm_dpn68_imagenet.11 [88]                       | -                   | imagenet1k       | Classification   | natural         | 206366               |
| timm_dpn68b_imagenet.11 [88]                      | -                   | imagenet1k       | Classification   | natural         | 206366               |
| timm_dpn107_imagenet.11 [88]                      | -                   | imagenet1k       | Classification   | natural         | 438400               |
| timm_dpn92_imagenet.11 [88]                       | -                   | imagenet1k       | Classification   | natural         | 152928               |
| timm_dpn131_imagenet.11 [88]                      | -                   | imagenet1k       | Classification   | natural         | 432640               |
| timm_ecaresnet101d_pruned_imagenet.11 [89]        | -                   | imagenet1k       | Classification   | natural         | 1623471              |
| timm_dpn98_imagenet.11 [88]                       | -                   | imagenet1k       | Classification   | natural         | 344960               |
| timm_ecaresnet101d_imagenet.11 [89]               | -                   | imagenet1k       | Classification   | natural         | 2374752              |
| timm_ecaresnet26t_imagenet.11 [89]                | -                   | imagenet1k       | Classification   | natural         | 699208               |
| timm_ecaresnet50d_imagenet.11 [89]                | -                   | imagenet1k       | Classification   | natural         | 1260640              |
| timm_ecaresnet50d_pruned_imagenet.11 [89]         | -                   | imagenet1k       | Classification   | natural         | 985657               |
| timm_ecaresnet50t_imagenet.11 [89]                | -                   | imagenet1k       | Classification   | natural         | 1260360              |
| timm_efficientnet_b0_imagenet.11 [24]             | -                   | imagenet1k       | Classification   | natural         | 2720                 |
| timm_ecaresnetlight_imagenet.11 [89]              | -                   | imagenet1k       | Classification   | natural         | 1527808              |
| timm_efficientnet_b1_imagenet.11 [24]             | -                   | imagenet1k       | Classification   | natural         | 5280                 |
| timm_efficientnet_b2_imagenet.11 [24]             | -                   | imagenet1k       | Classification   | natural         | 5760                 |
| timm_efficientnet_b1_pruned_imagenet.11 [24]      | -                   | imagenet1k       | Classification   | natural         | 4030                 |
| timm_efficientnet_b2_pruned_imagenet.11 [24]      | -                   | imagenet1k       | Classification   | natural         | 4753                 |
| timm_efficientnet_b3_imagenet.11 [24]             | -                   | imagenet1k       | Classification   | natural         | 7000                 |
| timm_efficientnet_b3_pruned_imagenet.11 [24]      | -                   | imagenet1k       | Classification   | natural         | 5186                 |
| timm_efficientnet_b4_imagenet.11 [24]             | -                   | imagenet1k       | Classification   | natural         | 8952                 |
| timm_efficientnet_el_imagenet.11 [90]             | -                   | imagenet1k       | Classification   | natural         | 181368               |
| timm_efficientnet_el_pruned_imagenet.11 [90]      | -                   | imagenet1k       | Classification   | natural         | 181368               |
| timm_efficientnet_em_imagenet.11 [90]             | -                   | imagenet1k       | Classification   | natural         | 108384               |
| timm_efficientnet_es_imagenet.11 [90]             | -                   | imagenet1k       | Classification   | natural         | 79456                |
| timm_efficientnet_es_pruned_imagenet.11 [90]      | -                   | imagenet1k       | Classification   | natural         | 79456                |
| timm_efficientnet_lite0_imagenet.11 [24]          | -                   | imagenet1k       | Classification   | natural         | 2720                 |
| timm_ecaresnet269d_imagenet.11 [89]               | -                   | imagenet1k       | Classification   | natural         | 5749856              |
| timm_ese_vovnet19b_dw_imagenet.11 [91]            | -                   | imagenet1k       | Classification   | natural         | 2432                 |
| timm_efficientnetv2_rw_s_imagenet.11 [92]         | -                   | imagenet1k       | Classification   | natural         | 124616               |
| timm_ese_vovnet39b_imagenet.11 [91]               | -                   | imagenet1k       | Classification   | natural         | 1581248              |
| timm_fbnetc_100_imagenet.11 [93]                  | -                   | imagenet1k       | Classification   | natural         | 1504                 |
| timm_ens_adv_inception_resnet_v2_imagenet.11 [94] | -                   | imagenet1k       | Classification   | natural         | 714848               |
| timm_gernet_l_imagenet.11 [95]                    | -                   | imagenet1k       | Classification   | natural         | 326624               |
| timm_efficientnetv2_rw_m_imagenet.11 [92]         | -                   | imagenet1k       | Classification   | natural         | 240416               |
| timm_gernet_m_imagenet.11 [95]                    | -                   | imagenet1k       | Classification   | natural         | 318944               |
| timm_gernet_s_imagenet.11 [95]                    | -                   | imagenet1k       | Classification   | natural         | 85431                |
| timm_ghostnet_100_imagenet.11 [9]                 | -                   | imagenet1k       | Classification   | natural         | 4616                 |

Continued on next page

| Model ID                                                     | Pretraining-Dataset | Training-Dataset | Task           | Visual Category | 3 × 3 Filters |
|--------------------------------------------------------------|---------------------|------------------|----------------|-----------------|---------------|
| timm_gluon_inception_v3 imagenet_11 [96]                     | -                   | imagenet1k       | Classification | natural         | 632928        |
| timm_gluon_resnet101_v1b imagenet_11 [96]                    | -                   | imagenet1k       | Classification | natural         | 2371584       |
| timm_gluon_resnet101_v1d imagenet_11 [96]                    | -                   | imagenet1k       | Classification | natural         | 2374752       |
| timm_gluon_resnet101_v1c imagenet_11 [96]                    | -                   | imagenet1k       | Classification | natural         | 2374752       |
| timm_gluon_resnet101_v1s imagenet_11 [96]                    | -                   | imagenet1k       | Classification | natural         | 2384064       |
| timm_gluon_resnet18_v1b imagenet_11 [96]                     | -                   | imagenet1k       | Classification | natural         | 1220608       |
| timm_gluon_resnet34_v1b imagenet_11 [96]                     | -                   | imagenet1k       | Classification | natural         | 2342912       |
| timm_gluon_resnet152_v1b imagenet_11 [96]                    | -                   | imagenet1k       | Classification | natural         | 3289088       |
| timm_gluon_resnet50_v1b imagenet_11 [96]                     | -                   | imagenet1k       | Classification | natural         | 1257472       |
| timm_gluon_resnet152_v1s imagenet_11 [96]                    | -                   | imagenet1k       | Classification | natural         | 3301568       |
| timm_gluon_resnet50_v1d imagenet_11 [96]                     | -                   | imagenet1k       | Classification | natural         | 1260640       |
| timm_gluon_resnet50_v1c imagenet_11 [96]                     | -                   | imagenet1k       | Classification | natural         | 1260640       |
| timm_gluon_resnet152_v1d imagenet_11 [96]                    | -                   | imagenet1k       | Classification | natural         | 3292256       |
| timm_gluon_resnet152_v1c imagenet_11 [96]                    | -                   | imagenet1k       | Classification | natural         | 3292256       |
| timm_gluon_resnet50_v1s imagenet_11 [96]                     | -                   | imagenet1k       | Classification | natural         | 1269952       |
| timm_gluon_resnext50_32x4d imagenet_11 [96]                  | -                   | imagenet1k       | Classification | natural         | 157184        |
| timm_gluon_resnext101_32x4d imagenet_11 [96]                 | -                   | imagenet1k       | Classification | natural         | 296448        |
| timm_gluon_seresnext50_32x4d imagenet_11 [96]                | -                   | imagenet1k       | Classification | natural         | 157184        |
| timm_gluon_seresnext101_32x4d imagenet_11 [96]               | -                   | imagenet1k       | Classification | natural         | 296448        |
| timm_gluon_resnext101_64x4d imagenet_11 [96]                 | -                   | imagenet1k       | Classification | natural         | 592896        |
| timm_hardcorenas_a imagenet_11 [97]                          | -                   | imagenet1k       | Classification | natural         | 128           |
| timm_gluon_seresnext101_64x4d imagenet_11 [96]               | -                   | imagenet1k       | Classification | natural         | 592896        |
| timm_hardcorenas_b imagenet_11 [97]                          | -                   | imagenet1k       | Classification | natural         | 2264          |
| timm_hardcorenas_c imagenet_11 [97]                          | -                   | imagenet1k       | Classification | natural         | 2192          |
| timm_gluon_xception65 imagenet_11 [96]                       | -                   | imagenet1k       | Classification | natural         | 46336         |
| timm_hardcorenas_d imagenet_11 [97]                          | -                   | imagenet1k       | Classification | natural         | 2776          |
| timm_gluon_senet154 imagenet_11 [96]                         | -                   | imagenet1k       | Classification | natural         | 3176128       |
| timm_hardcorenas_e imagenet_11 [97]                          | -                   | imagenet1k       | Classification | natural         | 1880          |
| timm_hardcorenas_f imagenet_11 [97]                          | -                   | imagenet1k       | Classification | natural         | 3728          |
| timm_hrnet_w18_small imagenet_11 [98]                        | -                   | imagenet1k       | Classification | natural         | 934592        |
| timm_hrnet_w18 imagenet_11 [98]                              | -                   | imagenet1k       | Classification | natural         | 1809204       |
| timm_hrnet_w18_small_v2 imagenet_11 [98]                     | -                   | imagenet1k       | Classification | natural         | 1188004       |
| timm_hrnet_w30 imagenet_11 [98]                              | -                   | imagenet1k       | Classification | natural         | 3595380       |
| timm_hrnet_w32 imagenet_11 [98]                              | -                   | imagenet1k       | Classification | natural         | 3979456       |
| timm_hrnet_w40 imagenet_11 [98]                              | -                   | imagenet1k       | Classification | natural         | 5762560       |
| timm_hrnet_w44 imagenet_11 [98]                              | -                   | imagenet1k       | Classification | natural         | 6802192       |
| timm_hrnet_w48 imagenet_11 [98]                              | -                   | imagenet1k       | Classification | natural         | 7940544       |
| timm_inception_resnet_v2 imagenet_11 [94]                    | -                   | imagenet1k       | Classification | natural         | 714848        |
| timm_inception_v4 imagenet_11 [94]                           | -                   | imagenet1k       | Classification | natural         | 531552        |
| timm_legacy_seresnet101 imagenet_11 [99]                     | -                   | imagenet1k       | Classification | natural         | 2371584       |
| timm_hrnet_w64 imagenet_11 [98]                              | -                   | imagenet1k       | Classification | natural         | 13481152      |
| timm_legacy_seresnet18 imagenet_11 [99]                      | -                   | imagenet1k       | Classification | natural         | 1220608       |
| timm_legacy_seresnet34 imagenet_11 [99]                      | -                   | imagenet1k       | Classification | natural         | 2342912       |
| timm_legacy_senet154 imagenet_11 [99]                        | -                   | imagenet1k       | Classification | natural         | 3176128       |
| timm_legacy_seresnet152 imagenet_11 [99]                     | -                   | imagenet1k       | Classification | natural         | 3289088       |
| timm_legacy_seresnet50 imagenet_11 [99]                      | -                   | imagenet1k       | Classification | natural         | 1257472       |
| timm_legacy_seresnext26_32x4d imagenet_11 [99]               | -                   | imagenet1k       | Classification | natural         | 87040         |
| timm_legacy_seresnext101_32x4d imagenet_11 [99]              | -                   | imagenet1k       | Classification | natural         | 296448        |
| timm_legacy_seresnext50_32x4d imagenet_11 [99]               | -                   | imagenet1k       | Classification | natural         | 157184        |
| timm_mixnet_l imagenet_11 [100]                              | -                   | imagenet1k       | Classification | natural         | 3868          |
| timm_mixnet_m imagenet_11 [100]                              | -                   | imagenet1k       | Classification | natural         | 2918          |
| timm_mixnet_s imagenet_11 [100]                              | -                   | imagenet1k       | Classification | natural         | 2284          |
| timm_mixnet_xl imagenet_11 [100]                             | -                   | imagenet1k       | Classification | natural         | 5672          |
| timm_mnasnet_100 imagenet_11 [101]                           | -                   | imagenet1k       | Classification | natural         | 2528          |
| timm_mobilenetv2_100 imagenet_11 [16]                        | -                   | imagenet1k       | Classification | natural         | 7232          |
| timm_mobilenetv2_110d imagenet_11 [16]                       | -                   | imagenet1k       | Classification | natural         | 10304         |
| timm_mobilenetv2_120d imagenet_11 [16]                       | -                   | imagenet1k       | Classification | natural         | 14048         |
| timm_mobilenetv2_140 imagenet_11 [16]                        | -                   | imagenet1k       | Classification | natural         | 10176         |
| timm_mobilenetv3_large_100 imagenet_11 [102]                 | -                   | imagenet1k       | Classification | natural         | 2160          |
| timm_mobilenetv3_large_100_miil imagenet_11 [102]            | imagenet21k         | imagenet1k       | Classification | natural         | 2160          |
| timm_mobilenetv3_large_100_miil_in21k_imagenet21k_p_11 [102] | -                   | imagenet21k_p    | Classification | natural         | 2160          |

Continued on next page

| Model ID                                    | Pretraining-Dataset | Training-Dataset | Task           | Visual Category | $3 \times 3$ Filters |
|---------------------------------------------|---------------------|------------------|----------------|-----------------|----------------------|
| timm_mobilenetv3_rw imagenet_11 [102]       | -                   | imagenet1k       | Classification | natural         | 2160                 |
| timm_pit_s_224 imagenet_11 [103]            | -                   | imagenet1k       | Classification | natural         | 864                  |
| timm_pit_b_224 imagenet_11 [103]            | -                   | imagenet1k       | Classification | natural         | 1536                 |
| timm_pit_b_distilled_224 imagenet_11 [103]  | -                   | imagenet1k       | Classification | natural         | 1536                 |
| timm_pit_s_distilled_224 imagenet_11 [103]  | -                   | imagenet1k       | Classification | natural         | 864                  |
| timm_nasnetalarge imagenet_11 [104]         | -                   | imagenet1k       | Classification | natural         | 44892                |
| timm_pit_ti_224 imagenet_11 [103]           | -                   | imagenet1k       | Classification | natural         | 384                  |
| timm_pit_ti_distilled_224 imagenet_11 [103] | -                   | imagenet1k       | Classification | natural         | 384                  |
| timm_pit_xs_224 imagenet_11 [103]           | -                   | imagenet1k       | Classification | natural         | 576                  |
| timm_pit_xs_distilled_224 imagenet_11 [103] | -                   | imagenet1k       | Classification | natural         | 576                  |
| timm_regnetx_002 imagenet_11 [105]          | -                   | imagenet1k       | Classification | natural         | 26208                |
| timm_pnasnet5large imagenet_11 [106]        | -                   | imagenet1k       | Classification | natural         | 37590                |
| timm_regnetx_004 imagenet_11 [105]          | -                   | imagenet1k       | Classification | natural         | 94304                |
| timm_regnetx_006 imagenet_11 [105]          | -                   | imagenet1k       | Classification | natural         | 125664               |
| timm_regnetx_008 imagenet_11 [105]          | -                   | imagenet1k       | Classification | natural         | 93280                |
| timm_regnetx_016 imagenet_11 [105]          | -                   | imagenet1k       | Classification | natural         | 161376               |
| timm_regnetx_032 imagenet_11 [105]          | -                   | imagenet1k       | Classification | natural         | 472416               |
| timm_regnetx_040 imagenet_11 [105]          | -                   | imagenet1k       | Classification | natural         | 476896               |
| timm_regnetx_064 imagenet_11 [105]          | -                   | imagenet1k       | Classification | natural         | 636704               |
| timm_regnetx_002 imagenet_11 [105]          | -                   | imagenet1k       | Classification | natural         | 26208                |
| timm_regnetx_004 imagenet_11 [105]          | -                   | imagenet1k       | Classification | natural         | 34080                |
| timm_regnetx_006 imagenet_11 [105]          | -                   | imagenet1k       | Classification | natural         | 73824                |
| timm_regnetx_120 imagenet_11 [105]          | -                   | imagenet1k       | Classification | natural         | 1655904              |
| timm_regnetx_008 imagenet_11 [105]          | -                   | imagenet1k       | Classification | natural         | 72800                |
| timm_regnetx_080 imagenet_11 [105]          | -                   | imagenet1k       | Classification | natural         | 1683296              |
| timm_regnetx_016 imagenet_11 [105]          | -                   | imagenet1k       | Classification | natural         | 199392               |
| timm_regnetx_032 imagenet_11 [105]          | -                   | imagenet1k       | Classification | natural         | 245472               |
| timm_repvgg_b0 imagenet_11 [107]            | -                   | imagenet1k       | Classification | natural         | 1450176              |
| timm_repvgg_b04 imagenet_11 [105]           | -                   | imagenet1k       | Classification | natural         | 622688               |
| timm_repvgg_b06 imagenet_11 [105]           | -                   | imagenet1k       | Classification | natural         | 933216               |
| timm_repvgg_b16 imagenet_11 [105]           | -                   | imagenet1k       | Classification | natural         | 2211936              |
| timm_repvgg_a2 imagenet_11 [107]            | -                   | imagenet1k       | Classification | natural         | 2675904              |
| timm_repvgg_b12 imagenet_11 [105]           | -                   | imagenet1k       | Classification | natural         | 1655904              |
| timm_repvgg_b08 imagenet_11 [105]           | -                   | imagenet1k       | Classification | natural         | 733920               |
| timm_repvgg_b1 imagenet_11 [107]            | -                   | imagenet1k       | Classification | natural         | 5529792              |
| timm_repvgg_b1g4 imagenet_11 [107]          | -                   | imagenet1k       | Classification | natural         | 3784896              |
| timm_regnetx_320 imagenet_11 [105]          | -                   | imagenet1k       | Classification | natural         | 4261920              |
| timm_regnetx_160 imagenet_11 [105]          | -                   | imagenet1k       | Classification | natural         | 2107488              |
| timm_repvgg_b2g4 imagenet_11 [107]          | -                   | imagenet1k       | Classification | natural         | 5911232              |
| timm_res2net101_26w_4s imagenet_11 [87]     | -                   | imagenet1k       | Classification | natural         | 1174212              |
| timm_repvgg_b3g4 imagenet_11 [107]          | -                   | imagenet1k       | Classification | natural         | 8116416              |
| timm_res2net50_26w_4s imagenet_11 [87]      | -                   | imagenet1k       | Classification | natural         | 622596               |
| timm_repvgg_b2 imagenet_11 [107]            | -                   | imagenet1k       | Classification | natural         | 8637632              |
| timm_res2net50_26w_6s imagenet_11 [87]      | -                   | imagenet1k       | Classification | natural         | 1037660              |
| timm_regnetx_320 imagenet_11 [105]          | -                   | imagenet1k       | Classification | natural         | 5651616              |
| timm_res2net50_48w_2s imagenet_11 [87]      | -                   | imagenet1k       | Classification | natural         | 707328               |
| timm_res2net50_14w_8s imagenet_11 [87]      | -                   | imagenet1k       | Classification | natural         | 421204               |
| timm_res2net50_26w_8s imagenet_11 [87]      | -                   | imagenet1k       | Classification | natural         | 1452724              |
| timm_res2net50 imagenet_11 [87]             | -                   | imagenet1k       | Classification | natural         | 117888               |
| timm_resnet14d imagenet_11 [38]             | -                   | imagenet1k       | Classification | natural         | 351328               |
| timm_repvgg_b3 imagenet_11 [107]            | -                   | imagenet1k       | Classification | natural         | 12042432             |
| timm_resnet26d imagenet_11 [38]             | -                   | imagenet1k       | Classification | natural         | 699488               |
| timm_resnet50d_1s4x24d imagenet_11 [38]     | -                   | imagenet1k       | Classification | natural         | 710496               |
| timm_resnet101e imagenet_11 [38]            | -                   | imagenet1k       | Classification | natural         | 2384064              |
| timm_resnet50d_4s2x40d imagenet_11 [38]     | -                   | imagenet1k       | Classification | natural         | 985568               |
| timm_resnet50d imagenet_11 [38]             | -                   | imagenet1k       | Classification | natural         | 1260640              |
| timm_resnet18d imagenet_11 [18]             | -                   | imagenet1k       | Classification | natural         | 1223776              |
| timm_resnet101d imagenet_11 [18]            | -                   | imagenet1k       | Classification | natural         | 2374752              |
| timm_resnet200e imagenet_11 [38]            | -                   | imagenet1k       | Classification | natural         | 3563712              |
| timm_resnet152d imagenet_11 [18]            | -                   | imagenet1k       | Classification | natural         | 3292256              |
| timm_resnet200d imagenet_11 [18]            | -                   | imagenet1k       | Classification | natural         | 3554400              |
| timm_resnet26 imagenet_11 [18]              | -                   | imagenet1k       | Classification | natural         | 696320               |

Continued on next page

| Model ID                                      | Pretraining-Dataset | Training-Dataset | Task           | Visual Category | $3 \times 3$ Filters |
|-----------------------------------------------|---------------------|------------------|----------------|-----------------|----------------------|
| timm_resnet26d_imagenet_11 [18]               | -                   | imagenet1k       | Classification | natural         | 699488               |
| timm_resnet34_imagenet_11 [18]                | -                   | imagenet1k       | Classification | natural         | 2342912              |
| timm_resnet34d_imagenet_11 [18]               | -                   | imagenet1k       | Classification | natural         | 2346080              |
| timm_resnest269e_imagenet_11 [38]             | -                   | imagenet1k       | Classification | natural         | 5759168              |
| timm_resnet50_imagenet_11 [18]                | -                   | imagenet1k       | Classification | natural         | 1257472              |
| timm_resnet50d_imagenet_11 [18]               | -                   | imagenet1k       | Classification | natural         | 1260640              |
| timm_resnet51q_imagenet_11 [18]               | -                   | imagenet1k       | Classification | natural         | 111152               |
| timm_resnetrs101_imagenet_11 [108]            | -                   | imagenet1k       | Classification | natural         | 2378848              |
| timm_resnetrs152_imagenet_11 [108]            | -                   | imagenet1k       | Classification | natural         | 3296352              |
| timm_resnetrs200_imagenet_11 [108]            | -                   | imagenet1k       | Classification | natural         | 3558496              |
| timm_resnetrs50_imagenet_11 [108]             | -                   | imagenet1k       | Classification | natural         | 1264736              |
| timm_resnext50_32x4d_imagenet_11 [109]        | -                   | imagenet1k       | Classification | natural         | 157184               |
| timm_resnetrs270_imagenet_11 [108]            | -                   | imagenet1k       | Classification | natural         | 5020768              |
| timm_resnext50d_32x4d_imagenet_11 [109]       | -                   | imagenet1k       | Classification | natural         | 160352               |
| timm_rexnet_100_imagenet_11 [110]             | -                   | imagenet1k       | Classification | natural         | 8654                 |
| timm_rexnet_130_imagenet_11 [110]             | -                   | imagenet1k       | Classification | natural         | 11256                |
| timm_rexnet_150_imagenet_11 [110]             | -                   | imagenet1k       | Classification | natural         | 12984                |
| timm_rexnet_200_imagenet_11 [110]             | -                   | imagenet1k       | Classification | natural         | 17308                |
| timm_selecsls42b_imagenet_11 [111]            | -                   | imagenet1k       | Classification | natural         | 3214432              |
| timm_resnetrs350_imagenet_11 [108]            | -                   | imagenet1k       | Classification | natural         | 6380640              |
| timm_selecsls60_imagenet_11 [111]             | -                   | imagenet1k       | Classification | natural         | 2913504              |
| timm_selecsls60b_imagenet_11 [111]            | -                   | imagenet1k       | Classification | natural         | 3175648              |
| timm_semnet_100_imagenet_11 [101]             | -                   | imagenet1k       | Classification | natural         | 4160                 |
| timm_seresnet50_imagenet_11 [99]              | -                   | imagenet1k       | Classification | natural         | 1257472              |
| timm_seresnext26d_32x4d_imagenet_11 [99]      | -                   | imagenet1k       | Classification | natural         | 90208                |
| timm_resnetrs420_imagenet_11 [108]            | -                   | imagenet1k       | Classification | natural         | 7494752              |
| timm_seresnext26t_32x4d_imagenet_11 [99]      | -                   | imagenet1k       | Classification | natural         | 89928                |
| timm_seresnet152d_imagenet_11 [99]            | -                   | imagenet1k       | Classification | natural         | 3292256              |
| timm_seresnext50_32x4d_imagenet_11 [99]       | -                   | imagenet1k       | Classification | natural         | 157184               |
| timm_skresnet18_imagenet_11 [112]             | -                   | imagenet1k       | Classification | natural         | 1220608              |
| timm_skresnet34_imagenet_11 [112]             | -                   | imagenet1k       | Classification | natural         | 2342912              |
| timm_spnasnet_100_imagenet_11 [113]           | -                   | imagenet1k       | Classification | natural         | 2552                 |
| timm_skresnext50_32x4d_imagenet_11 [112]      | -                   | imagenet1k       | Classification | natural         | 314368               |
| timm_ssl_resnet18_imagenet_11 [114]           | yfcc100m            | imagenet1k       | Classification | natural         | 1220608              |
| timm_ssl_resnet50_imagenet_11 [114]           | yfcc100m            | imagenet1k       | Classification | natural         | 1257472              |
| timm_ssl_resnext50_32x4d_imagenet_11 [114]    | yfcc100m            | imagenet1k       | Classification | natural         | 157184               |
| timm_ssl_resnext101_32x4d_imagenet_11 [114]   | yfcc100m            | imagenet1k       | Classification | natural         | 296448               |
| timm_swsl_resnet18_imagenet_11 [114]          | instagram1b         | imagenet1k       | Classification | natural         | 1220608              |
| timm_ssl_resnext101_32x8d_imagenet_11 [114]   | yfcc100m            | imagenet1k       | Classification | natural         | 1185792              |
| timm_swsl_resnet50_imagenet_11 [114]          | instagram1b         | imagenet1k       | Classification | natural         | 1257472              |
| timm_ssl_resnext101_32x16d_imagenet_11 [114]  | yfcc100m            | imagenet1k       | Classification | natural         | 4743168              |
| timm_swsl_resnext101_32x4d_imagenet_11 [114]  | instagram1b         | imagenet1k       | Classification | natural         | 296448               |
| timm_swsl_resnext50_32x4d_imagenet_11 [114]   | instagram1b         | imagenet1k       | Classification | natural         | 157184               |
| timm_swsl_resnext101_32x8d_imagenet_11 [114]  | instagram1b         | imagenet1k       | Classification | natural         | 1185792              |
| timm_tf_efficientnet_b0_ap_imagenet_11 [115]  | -                   | imagenet1k       | Classification | natural         | 2720                 |
| timm_tf_efficientnet_b0_imagenet_11 [24]      | -                   | imagenet1k       | Classification | natural         | 2720                 |
| timm_tf_efficientnet_b0_ns_imagenet_11 [116]  | jft300m             | imagenet1k       | Classification | natural         | 2720                 |
| timm_tf_efficientnet_b1_ap_imagenet_11 [115]  | -                   | imagenet1k       | Classification | natural         | 5280                 |
| timm_tf_efficientnet_b1_imagenet_11 [24]      | -                   | imagenet1k       | Classification | natural         | 5280                 |
| timm_swsl_resnext101_32x16d_imagenet_11 [114] | instagram1b         | imagenet1k       | Classification | natural         | 4743168              |
| timm_tf_efficientnet_b1_ns_imagenet_11 [116]  | jft300m             | imagenet1k       | Classification | natural         | 5280                 |
| timm_tf_efficientnet_b2_ap_imagenet_11 [115]  | -                   | imagenet1k       | Classification | natural         | 5760                 |
| timm_tf_efficientnet_b2_imagenet_11 [24]      | -                   | imagenet1k       | Classification | natural         | 5760                 |
| timm_tf_efficientnet_b2_ns_imagenet_11 [116]  | jft300m             | imagenet1k       | Classification | natural         | 5760                 |
| timm_tf_efficientnet_b3_ap_imagenet_11 [115]  | -                   | imagenet1k       | Classification | natural         | 7000                 |
| timm_tf_efficientnet_b3_imagenet_11 [24]      | -                   | imagenet1k       | Classification | natural         | 7000                 |
| timm_tf_efficientnet_b3_ns_imagenet_11 [116]  | jft300m             | imagenet1k       | Classification | natural         | 7000                 |
| timm_tf_efficientnet_b4_ap_imagenet_11 [115]  | -                   | imagenet1k       | Classification | natural         | 8952                 |
| timm_tf_efficientnet_b4_imagenet_11 [24]      | -                   | imagenet1k       | Classification | natural         | 8952                 |
| timm_tf_efficientnet_b4_ns_imagenet_11 [116]  | jft300m             | imagenet1k       | Classification | natural         | 8952                 |
| timm_tf_efficientnet_b5_ap_imagenet_11 [115]  | -                   | imagenet1k       | Classification | natural         | 14304                |
| timm_tf_efficientnet_b5_imagenet_11 [24]      | -                   | imagenet1k       | Classification | natural         | 14304                |

Continued on next page



| Model ID                                                | Pretraining-Dataset | Training-Dataset | Task           | Visual Category | $3 \times 3$ Filters |
|---------------------------------------------------------|---------------------|------------------|----------------|-----------------|----------------------|
| timm_tf_efficientnet_b5_ns_imagenet_11 [116]            | jft300m             | imagenet1k       | Classification | natural         | 14304                |
| timm_tf_efficientnet_b6_ap_imagenet_11 [115]            | -                   | imagenet1k       | Classification | natural         | 17136                |
| timm_tf_efficientnet_b6_imagenet_11 [24]                | -                   | imagenet1k       | Classification | natural         | 17136                |
| timm_tf_efficientnet_b6_ns_imagenet_11 [116]            | jft300m             | imagenet1k       | Classification | natural         | 17136                |
| timm_tf_efficientnet_b7_ap_imagenet_11 [115]            | -                   | imagenet1k       | Classification | natural         | 25216                |
| timm_tf_efficientnet_el_imagenet_11 [90]                | -                   | imagenet1k       | Classification | natural         | 181368               |
| timm_tf_efficientnet_b7_imagenet_11 [24]                | -                   | imagenet1k       | Classification | natural         | 25216                |
| timm_tf_efficientnet_b7_ns_imagenet_11 [116]            | jft300m             | imagenet1k       | Classification | natural         | 25216                |
| timm_tf_efficientnet_b8_ap_imagenet_11 [115]            | -                   | imagenet1k       | Classification | natural         | 29232                |
| timm_tf_efficientnet_em_imagenet_11 [90]                | -                   | imagenet1k       | Classification | natural         | 108384               |
| timm_tf_efficientnet_b8_imagenet_11 [24]                | -                   | imagenet1k       | Classification | natural         | 29232                |
| timm_tf_efficientnet_es_imagenet_11 [90]                | -                   | imagenet1k       | Classification | natural         | 79456                |
| timm_tf_efficientnet_lite0_imagenet_11 [24]             | -                   | imagenet1k       | Classification | natural         | 2720                 |
| timm_tf_efficientnet_lite1_imagenet_11 [24]             | -                   | imagenet1k       | Classification | natural         | 3344                 |
| timm_tf_efficientnet_lite2_imagenet_11 [24]             | -                   | imagenet1k       | Classification | natural         | 3632                 |
| timm_tf_efficientnet_lite3_imagenet_11 [24]             | -                   | imagenet1k       | Classification | natural         | 4640                 |
| timm_tf_efficientnet_lite4_imagenet_11 [24]             | -                   | imagenet1k       | Classification | natural         | 6176                 |
| timm_tf_efficientnetv2_b0_imagenet_11 [92]              | -                   | imagenet1k       | Classification | natural         | 32000                |
| timm_tf_efficientnetv2_b1_imagenet_11 [92]              | -                   | imagenet1k       | Classification | natural         | 47776                |
| timm_tf_efficientnetv2_b2_imagenet_11 [92]              | -                   | imagenet1k       | Classification | natural         | 56912                |
| timm_tf_efficientnetv2_b3_imagenet_11 [92]              | -                   | imagenet1k       | Classification | natural         | 70040                |
| timm_tf_efficientnetv2_s_imagenet_11 [92]               | -                   | imagenet1k       | Classification | natural         | 123272               |
| timm_tf_efficientnetv2_m_imagenet_11 [92]               | -                   | imagenet1k       | Classification | natural         | 217608               |
| timm_tf_efficientnetv2_m_in21ft1k_imagenet_11 [92]      | imagenet21k         | imagenet1k       | Classification | natural         | 217608               |
| timm_tf_efficientnetv2_s_in21ft1k_imagenet_11 [92]      | imagenet21k         | imagenet1k       | Classification | natural         | 123272               |
| timm_tf_efficientnetv2_m_in21k_imagenet21k_e_11 [92]    | -                   | imagenet21k_e    | Classification | natural         | 217608               |
| timm_tf_inception_v3_imagenet_11 [17]                   | -                   | imagenet1k       | Classification | natural         | 632928               |
| timm_tf_efficientnetv2_s_in21k_imagenet21k_e_11 [92]    | -                   | imagenet21k_e    | Classification | natural         | 123272               |
| timm_tf_mixnet_l_imagenet_11 [100]                      | -                   | imagenet1k       | Classification | natural         | 3868                 |
| timm_tf_efficientnetv2_l_imagenet_11 [92]               | -                   | imagenet1k       | Classification | natural         | 458784               |
| timm_tf_mixnet_m_imagenet_11 [100]                      | -                   | imagenet1k       | Classification | natural         | 2918                 |
| timm_tf_efficientnetv2_l_in21ft1k_imagenet_11 [92]      | imagenet21k         | imagenet1k       | Classification | natural         | 458784               |
| timm_tf_efficientnetv2_l_in21k_imagenet21k_e_11 [92]    | -                   | imagenet21k_e    | Classification | natural         | 458784               |
| timm_tf_mixnet_s_imagenet_11 [100]                      | -                   | imagenet1k       | Classification | natural         | 2284                 |
| timm_tf_mobilenetv3_large_075_imagenet_11 [102]         | -                   | imagenet1k       | Classification | natural         | 1752                 |
| timm_tf_mobilenetv3_large_100_imagenet_11 [102]         | -                   | imagenet1k       | Classification | natural         | 2160                 |
| timm_tf_mobilenetv3_large_minimal_100_imagenet_11 [102] | -                   | imagenet1k       | Classification | natural         | 5064                 |
| timm_tf_mobilenetv3_small_075_imagenet_11 [102]         | -                   | imagenet1k       | Classification | natural         | 224                  |
| timm_tf_mobilenetv3_small_100_imagenet_11 [102]         | -                   | imagenet1k       | Classification | natural         | 224                  |
| timm_tf_mobilenetv3_small_minimal_100_imagenet_11 [102] | -                   | imagenet1k       | Classification | natural         | 2504                 |
| timm_tf_efficientnet_l2_ns_475_imagenet_11 [116]        | jft300m             | imagenet1k       | Classification | natural         | 85816                |
| timm_xception41_imagenet_11 [117]                       | -                   | imagenet1k       | Classification | natural         | 28864                |
| timm_xception65_imagenet_11 [117]                       | -                   | imagenet1k       | Classification | natural         | 46336                |
| timm_visformer_small_imagenet_11 [118]                  | -                   | imagenet1k       | Classification | natural         | 129024               |
| timm_xception_imagenet_11 [117]                         | -                   | imagenet1k       | Classification | natural         | 25192                |
| timm_tf_efficientnet_l2_ns_imagenet_11 [116]            | jft300m             | imagenet1k       | Classification | natural         | 85816                |
| timm_xception71_imagenet_11 [117]                       | -                   | imagenet1k       | Classification | natural         | 49288                |
| tinynet_a_imagenet_11 [119]                             | -                   | imagenet1k       | Classification | natural         | 3200                 |
| timm_wide_resnet50_2_imagenet_11 [120]                  | -                   | imagenet1k       | Classification | natural         | 5029888              |
| timm_twins_pcpvt_small_imagenet_11 [121]                | -                   | imagenet1k       | Classification | natural         | 1024                 |
| tinynet_b_imagenet_11 [119]                             | -                   | imagenet1k       | Classification | natural         | 2192                 |
| tinynet_c_imagenet_11 [119]                             | -                   | imagenet1k       | Classification | natural         | 1520                 |
| timm_twins_svt_small_imagenet_11 [121]                  | -                   | imagenet1k       | Classification | natural         | 960                  |
| tinynet_d_imagenet_11 [119]                             | -                   | imagenet1k       | Classification | natural         | 1184                 |
| tinynet_e_imagenet_11 [119]                             | -                   | imagenet1k       | Classification | natural         | 1136                 |
| timm_twins_svt_base_imagenet_11 [121]                   | -                   | imagenet1k       | Classification | natural         | 1440                 |
| timm_twins_pcpvt_base_imagenet_11 [121]                 | -                   | imagenet1k       | Classification | natural         | 1024                 |

Continued on next page

| Model ID                                      | Pretraining-Dataset | Training-Dataset                                                                                       | Task           | Visual Category | 3 × 3 Filters |
|-----------------------------------------------|---------------------|--------------------------------------------------------------------------------------------------------|----------------|-----------------|---------------|
| torchseg_dfn_R101_v1c_voc_11 [122]            | -                   | voc/2012                                                                                               | Segmentation   | natural         | 6649810       |
| torchseg_pspnet_R101_v1c_ade_11 [123]         | -                   | ade20k                                                                                                 | Segmentation   | natural         | 4481216       |
| alexnet_imagenet_11 [11]                      | -                   | imagenet1k                                                                                             | Classification | natural         | 237568        |
| densenet121_imagenet_11 [12]                  | -                   | imagenet1k                                                                                             | Classification | natural         | 237568        |
| timm_twins_svt_large_imagenet_11 [121]        | -                   | imagenet1k                                                                                             | Classification | natural         | 1920          |
| densenet161_imagenet_11 [12]                  | -                   | imagenet1k                                                                                             | Classification | natural         | 718848        |
| densenet169_imagenet_11 [12]                  | -                   | imagenet1k                                                                                             | Classification | natural         | 335872        |
| googlenet_imagenet_11 [14]                    | -                   | imagenet1k                                                                                             | Classification | natural         | 368384        |
| mnasnet0_5_imagenet_11 [101]                  | -                   | imagenet1k                                                                                             | Classification | natural         | 1288          |
| mobilenet_v2_imagenet_11 [16]                 | -                   | imagenet1k                                                                                             | Classification | natural         | 7232          |
| mnasnet1_0_imagenet_11 [101]                  | -                   | imagenet1k                                                                                             | Classification | natural         | 2528          |
| densenet201_imagenet_11 [12]                  | -                   | imagenet1k                                                                                             | Classification | natural         | 401408        |
| inception_v3_imagenet_11 [17]                 | -                   | imagenet1k                                                                                             | Classification | natural         | 632928        |
| resnet101_imagenet_11 [18]                    | -                   | imagenet1k                                                                                             | Classification | natural         | 2371584       |
| timm_twins_pcpvt_large_imagenet_11 [121]      | -                   | imagenet1k                                                                                             | Classification | natural         | 1024          |
| resnet152_imagenet_11 [18]                    | -                   | imagenet1k                                                                                             | Classification | natural         | 3289088       |
| resnet18_imagenet_11 [18]                     | -                   | imagenet1k                                                                                             | Classification | natural         | 1220608       |
| resnet34_imagenet_11 [18]                     | -                   | imagenet1k                                                                                             | Classification | natural         | 2342912       |
| resnet50_imagenet_11 [18]                     | -                   | imagenet1k                                                                                             | Classification | natural         | 1257472       |
| resnext101_32x8d_imagenet_11 [109]            | -                   | imagenet1k                                                                                             | Classification | natural         | 1185792       |
| resnext50_32x4d_imagenet_11 [109]             | -                   | imagenet1k                                                                                             | Classification | natural         | 157184        |
| shufflenet_v2_x0_5_imagenet_11 [124]          | -                   | imagenet1k                                                                                             | Classification | natural         | 1104          |
| shufflenet_v2_x1_0_imagenet_11 [124]          | -                   | imagenet1k                                                                                             | Classification | natural         | 2532          |
| squeezenet1_0_imagenet_11 [125]               | -                   | imagenet1k                                                                                             | Classification | natural         | 61440         |
| squeezenet1_1_imagenet_11 [125]               | -                   | imagenet1k                                                                                             | Classification | natural         | 61632         |
| vgg11_bn_imagenet_11 [19]                     | -                   | imagenet1k                                                                                             | Classification | natural         | 1024192       |
| vgg16_bn_imagenet_11 [19]                     | -                   | imagenet1k                                                                                             | Classification | natural         | 1634496       |
| vgg13_imagenet_11 [19]                        | -                   | imagenet1k                                                                                             | Classification | natural         | 1044672       |
| vgg11_imagenet_11 [19]                        | -                   | imagenet1k                                                                                             | Classification | natural         | 1024192       |
| vgg13_bn_imagenet_11 [19]                     | -                   | imagenet1k                                                                                             | Classification | natural         | 1044672       |
| vgg16_imagenet_11 [19]                        | -                   | imagenet1k                                                                                             | Classification | natural         | 1634496       |
| vgg19_bn_imagenet_11 [19]                     | -                   | imagenet1k                                                                                             | Classification | natural         | 2224320       |
| torchxrayvision_densenet121_all_11 [126]      | -                   | kaggle/rsna_pneumonia_detection_challenge_nih_chest_x-ray8, padchest, chexpert, mimic_cxr/v1.0.0_small | Classification | medical xray    | 237568        |
| vgg19_imagenet_11 [19]                        | -                   | imagenet1k                                                                                             | Classification | natural         | 2224320       |
| torchxrayvision_densenet121_chex_11 [126]     | -                   | chexpert                                                                                               | Classification | medical xray    | 237568        |
| wide_resnet50_2_imagenet_11 [120]             | -                   | imagenet1k                                                                                             | Classification | natural         | 5029888       |
| torchxrayvision_densenet121_kaggle_11 [126]   | -                   | kaggle/rsna_pneumonia_detection_challenge                                                              | Classification | medical xray    | 237568        |
| torchxrayvision_densenet121_mimic_ch_11 [126] | -                   | mimic_cxr/v1.0.0_small                                                                                 | Classification | medical xray    | 237568        |
| torchxrayvision_densenet121_mimic_nb_11 [126] | -                   | mimic_cxr/v1.0.0_small                                                                                 | Classification | medical xray    | 237568        |
| torchxrayvision_densenet121_nih_11 [126]      | -                   | nih_chest_x-ray8                                                                                       | Classification | medical xray    | 237568        |
| torchxrayvision_densenet121_pc_11 [126]       | -                   | padchest                                                                                               | Classification | medical xray    | 237568        |

Continued on next page

| Model ID                                                                              | Pretraining-Dataset | Training-Dataset                                                                                        | Task             | Visual Category | $3 \times 3$ Filters |
|---------------------------------------------------------------------------------------|---------------------|---------------------------------------------------------------------------------------------------------|------------------|-----------------|----------------------|
| torchxrayvision_resnet50_512_all.11 [126]                                             | -                   | kaggle/rsna_pneumonia_detection_challenge, nih_chest_x_ray8, padchest, chexpert, mimic_cxr/v1.0.0_small | Classification   | medical xray    | 1257472              |
| torchxrayvision_resnet101_elastic_ae_padchest_nih_chexpert_mimic_nb_mimic_ch.11 [126] | -                   | padchest, nih_chest_x_ray8, chexpert, mimic_cxr/v1.0.0_small                                            | Auto-Encoder     | medical xray    | 1728000              |
| wide_resnet101_2_imagenet.11 [120]                                                    | -                   | imagenet1k                                                                                              | Classification   | natural         | 9486336              |
| unet_carvana_carvana.11 [127]                                                         | -                   | kaggle/carvana_image_masking_challenge                                                                  | Segmentation     | cars            | 1917120              |
| unet_lgg_mri_segmentation.11 [127]                                                    | -                   | kaggle/lgg_mri_segmentation                                                                             | Segmentation     | medical mri     | 784480               |
| yolov5s_v40_coco2017_12 [128]                                                         | -                   | coco/2017                                                                                               | Object Detection | natural         | 486784               |
| yolov5m_v40_coco2017_12 [128]                                                         | -                   | coco/2017                                                                                               | Object Detection | natural         | 1613376              |
| yolov5l_v40_coco2017_12 [128]                                                         | -                   | coco/2017                                                                                               | Object Detection | natural         | 3789568              |
| yolov5x_v40_coco2017_12 [128]                                                         | -                   | coco/2017                                                                                               | Object Detection | natural         | 7360960              |



## References

- [1] Tommy Odland, “tommyod/kdepy: Kernel density estimation in python,” 2018. 2
- [2] Huy Phan, “huyvphan/pytorch\_cifar10,” Jan. 2021. 3, 19
- [3] Ross Wightman, “Pytorch image models.” <https://github.com/rwightman/pytorch-image-models>, 2019. 19
- [4] Francesco Croce, Maksym Andriushchenko, Vikash Sehwal, Edoardo Debenedetti, Nicolas Flammarion, Mung Chiang, Prateek Mittal, and Matthias Hein, “Robust-bench: a standardized adversarial robustness benchmark,” in *Thirty-fifth Conference on Neural Information Processing Systems Datasets and Benchmarks Track*, 2021. 19
- [5] TensorFlow, “Tensorflow datasets.” 19
- [6] AgriPredict, “Agripredict disease-classification.” 19
- [7] Jun-Yan Zhu, Taesung Park, Phillip Isola, and Alexei A. Efros, “Unpaired image-to-image translation using cycle-consistent adversarial networks,” 2020. 19
- [8] Bolei Zhou, Agata Lapedriza, Aditya Khosla, Aude Oliva, and Antonio Torralba, “Places: A 10 million image database for scene recognition,” *IEEE Transactions on Pattern Analysis and Machine Intelligence*, 2017. 19, 22
- [9] Kai Han, Yunhe Wang, Qi Tian, Jianyuan Guo, Chunjing Xu, and Chang Xu, “Ghostnet: More features from cheap operations,” 2020. 19, 26
- [10] Ping Chao, Chao-Yang Kao, Yu-Shan Ruan, Chien-Hsiang Huang, and Youn-Long Lin, “Hardnet: A low memory traffic network,” 2019. 19
- [11] Alex Krizhevsky, Ilya Sutskever, and Geoffrey E Hinton, “Imagenet classification with deep convolutional neural networks,” in *Advances in Neural Information Processing Systems* (F. Pereira, C. J. C. Burges, L. Bottou, and K. Q. Weinberger, eds.), vol. 25, Curran Associates, Inc., 2012. 19, 31
- [12] Gao Huang, Zhuang Liu, Laurens van der Maaten, and Kilian Q. Weinberger, “Densely connected convolutional networks,” 2018. 19, 20, 26, 31
- [13] Raunak Dey and Yi Hong, “Compnet: Complementary segmentation network for brain mri extraction,” 2018. 19, 20
- [14] Christian Szegedy, Wei Liu, Yangqing Jia, Pierre Sermanet, Scott Reed, Dragomir Anguelov, Dumitru Erhan, Vincent Vanhoucke, and Andrew Rabinovich, “Going deeper with convolutions,” 2014. 20, 31
- [15] Nicolas Carion, Francisco Massa, Gabriel Synnaeve, Nicolas Usunier, Alexander Kirillov, and Sergey Zagoruyko, “End-to-end object detection with transformers,” 2020. 20
- [16] Mark Sandler, Andrew Howard, Menglong Zhu, Andrey Zhmoginov, and Liang-Chieh Chen, “Mobilenetv2: Inverted residuals and linear bottlenecks,” 2019. 20, 27, 31
- [17] Christian Szegedy, Vincent Vanhoucke, Sergey Ioffe, Jonathon Shlens, and Zbigniew Wojna, “Rethinking the inception architecture for computer vision,” 2015. 20, 30, 31
- [18] Kaiming He, Xiangyu Zhang, Shaoqing Ren, and Jian Sun, “Deep residual learning for image recognition,” 2015. 20, 21, 28, 29, 31
- [19] Karen Simonyan and Andrew Zisserman, “Very deep convolutional networks for large-scale image recognition,” 2015. 21, 31
- [20] Johannes Hofmanninger, Florian Prayer, Jeanny Pan, Sebastian Röhrich, Helmut Prosch, and Georg Langs, “Automatic lung segmentation in routine imaging is primarily a data diversity problem, not a methodology problem,” *European Radiology Experimental*, vol. 4, Aug. 2020. 21
- [21] Zhiqiang Shen and Marios Savvides, “Meal v2: Boosting vanilla resnet-50 to 80” 21
- [22] Justin Johnson, Alexandre Alahi, and Li Fei-Fei, “Perceptual losses for real-time style transfer and super-resolution,” 2016. 21, 22
- [23] René Ranftl, Katrin Lasinger, David Hafner, Konrad Schindler, and Vladlen Koltun, “Towards robust monocular depth estimation: Mixing datasets for zero-shot cross-dataset transfer,” 2020. 21
- [24] Mingxing Tan and Quoc V. Le, “Efficientnet: Rethinking model scaling for convolutional neural networks,” 2020. 21, 26, 29, 30
- [25] Shah Nawaz, Alessandro Calefati, Moreno Caraffini, Nicola Landro, and Ignazio Gallo, “Are these birds similar: Learning branched networks for fine-grained representations,” in *2019 International Conference on Image and Vision Computing New Zealand (IVCNZ)*, pp. 1–5, 2019. 21
- [26] Rasmus Rothe, Radu Timofte, and Luc Van Gool, “Dex: Deep expectation of apparent age from a single image,” in *2015 IEEE International Conference on Computer Vision Workshop (ICCVW)*, pp. 252–257, 2015. 21, 22
- [27] Emad Barsoum, Cha Zhang, Cristian Canton Ferrer, and Zhengyou Zhang, “Training deep networks for facial expression recognition with crowd-sourced label distribution,” 2016. 21
- [28] Wei Liu, Dragomir Anguelov, Dumitru Erhan, Christian Szegedy, Scott Reed, Cheng-Yang Fu, and Alexander C. Berg, “Ssd: Single shot multibox detector,” 2016. 21
- [29] Andrew G. Howard, Menglong Zhu, Bo Chen, Dmitry Kalenichenko, Weijun Wang, Tobias Weyand, Marco Andreetto, and Hartwig Adam, “Mobilenets: Efficient convolutional neural networks for mobile vision applications,” 2017. 21
- [30] Wenzhe Shi, Jose Caballero, Ferenc Huszár, Johannes Totz, Andrew P. Aitken, Rob Bishop, Daniel Rueckert, and Zehan Wang, “Real-time single image and video super-resolution using an efficient sub-pixel convolutional neural network,” 2016. 22
- [31] Tsung-Yi Lin, Priya Goyal, Ross Girshick, Kaiming He, and Piotr Dollár, “Focal loss for dense object detection,” 2018. 22

- [32] Linzaer, “Ultra-lightweight face detection model.” <https://github.com/Linzaer/Ultra-Light-Fast-Generic-Face-Detector-1MB>, 2019. 22
- [33] Joseph Redmon and Ali Farhadi, “Yolov3: An incremental improvement,” 2018. 22
- [34] Tero Karras, Timo Aila, Samuli Laine, and Jaakko Lehtinen, “Progressive growing of gans for improved quality, stability, and variation,” 2018. 22
- [35] Joseph Redmon and Ali Farhadi, “Yolo9000: Better, faster, stronger,” 2016. 22
- [36] Alexey Bochkovskiy, Chien-Yao Wang, and Hong-Yuan Mark Liao, “Yolov4: Optimal speed and accuracy of object detection,” 2020. 22
- [37] Matthew D Zeiler and Rob Fergus, “Visualizing and understanding convolutional networks,” 2013. 22
- [38] Hang Zhang, Chongruo Wu, Zhongyue Zhang, Yi Zhu, Haibin Lin, Zhi Zhang, Yue Sun, Tong He, Jonas Mueller, R. Manmatha, Mu Li, and Alexander Smola, “Resnest: Split-attention networks,” 2020. 22, 23, 28, 29
- [39] Jiankang Deng, Jia Guo, Niannan Xue, and Stefanos Zafeiriou, “Arcface: Additive angular margin loss for deep face recognition,” 2019. 22
- [40] Panqu Wang, Pengfei Chen, Ye Yuan, Ding Liu, Zehua Huang, Xiaodi Hou, and Garrison Cottrell, “Understanding convolution for semantic segmentation,” 2018. 22
- [41] Xintao Wang, Liangbin Xie, Chao Dong, and Ying Shan, “Real-esrgan: Training real-world blind super-resolution with pure synthetic data,” 2021. 22, 23
- [42] Hirokatsu Kataoka, Kazushige Okayasu, Asato Matsumoto, Eisuke Yamagata, Ryosuke Yamada, Nakamasa Inoue, Akio Nakamura, and Yutaka Satoh, “Pre-training without natural images,” 2020. 22
- [43] Sravanti Addepalli, Samyak Jain, Gaurang Sriramanan, Shivangi Khare, and Venkatesh Babu Radhakrishnan, “Towards achieving adversarial robustness beyond perceptual limits,” in *ICML 2021 Workshop on Adversarial Machine Learning*, 2021. 22
- [44] Maksym Andriushchenko and Nicolas Flammarion, “Understanding and improving fast adversarial training,” 2020. 22
- [45] Maximilian Augustin, Alexander Meinke, and Matthias Hein, “Adversarial robustness on in- and out-distribution improves explainability,” 2020. 23
- [46] Yair Carmon, Aditi Raghunathan, Ludwig Schmidt, Percy Liang, and John C. Duchi, “Unlabeled data improves adversarial robustness,” 2019. 23
- [47] Jinghui Chen, Yu Cheng, Zhe Gan, Quanquan Gu, and Jingjing Liu, “Efficient robust training via backward smoothing,” 2020. 23
- [48] Tianlong Chen, Sijia Liu, Shiyu Chang, Yu Cheng, Lisa Amini, and Zhangyang Wang, “Adversarial robustness: From self-supervised pre-training to fine-tuning,” 2020. 23
- [49] Jiequan Cui, Shu Liu, Liwei Wang, and Jiaya Jia, “Learnable boundary guided adversarial training,” 2021. 23
- [50] James Diffenderfer, Brian R. Bartoldson, Shreya Chaganti, Jize Zhang, and Bhavya Kaillkura, “A winning hand: Compressing deep networks can improve out-of-distribution robustness,” 2021. 23
- [51] Gavin Weiguang Ding, Yash Sharma, Kry Yik Chau Lui, and Ruitong Huang, “Mma training: Direct input space margin maximization through adversarial training,” in *International Conference on Learning Representations*, 2020. 23
- [52] Logan Engstrom, Andrew Ilyas, Hadi Salman, Shibani Santurkar, and Dimitris Tsipras, “Robustness (python library),” 2019. 23
- [53] Robert Geirhos, Patricia Rubisch, Claudio Michaelis, Matthias Bethge, Felix A. Wichmann, and Wieland Brendel, “Imagenet-trained cnns are biased towards texture; increasing shape bias improves accuracy and robustness,” 2019. 23
- [54] Sven Gowal, Chongli Qin, Jonathan Uesato, Timothy Mann, and Pushmeet Kohli, “Uncovering the limits of adversarial training against norm-bounded adversarial examples,” 2021. 23, 24
- [55] Dan Hendrycks, Kimin Lee, and Mantas Mazeika, “Using pre-training can improve model robustness and uncertainty,” 2019. 23
- [56] Dan Hendrycks, Norman Mu, Ekin D. Cubuk, Barret Zoph, Justin Gilmer, and Balaji Lakshminarayanan, “Augmix: A simple data processing method to improve robustness and uncertainty,” 2020. 23, 24
- [57] Dan Hendrycks, Steven Basart, Norman Mu, Saurav Kadavath, Frank Wang, Evan Dorundo, Rahul Desai, Tyler Zhu, Samyak Parajuli, Mike Guo, Dawn Song, Jacob Steinhardt, and Justin Gilmer, “The many faces of robustness: A critical analysis of out-of-distribution generalization,” 2021. 24
- [58] Lang Huang, Chao Zhang, and Hongyang Zhang, “Self-adaptive training: beyond empirical risk minimization,” 2020. 24
- [59] Klim Kireev, Maksym Andriushchenko, and Nicolas Flammarion, “On the effectiveness of adversarial training against common corruptions,” 2021. 24
- [60] Hanxun Huang, Yisen Wang, Sarah Monazam Erfani, Quanquan Gu, James Bailey, and Xingjun Ma, “Exploring architectural ingredients of adversarially robust deep neural networks,” 2021. 24
- [61] Rahul Rade and Seyed-Mohsen Moosavi-Dezfooli, “Helper-based adversarial training: Reducing excessive margin to achieve a better accuracy vs. robustness trade-off,” in *ICML 2021 Workshop on Adversarial Machine Learning*, 2021. 24
- [62] Tianyu Pang, Xiao Yang, Yinpeng Dong, Kun Xu, Jun Zhu, and Hang Su, “Boosting adversarial training with hypersphere embedding,” 2020. 24

- [63] Sylvestre-Alvise Rebuffi, Sven Gowal, Dan A. Calian, Florian Stimberg, Olivia Wiles, and Timothy Mann, “Fixing data augmentation to improve adversarial robustness,” 2021. 24, 25
- [64] Leslie Rice, Eric Wong, and J. Zico Kolter, “Overfitting in adversarially robust deep learning,” 2020. 25
- [65] Jérôme Rony, Luiz G. Hafemann, Luiz S. Oliveira, Ismail Ben Ayed, Robert Sabourin, and Eric Granger, “Decoupling direction and norm for efficient gradient-based l2 adversarial attacks and defenses,” 2019. 25
- [66] Hadi Salman, Andrew Ilyas, Logan Engstrom, Ashish Kapoor, and Aleksander Madry, “Do adversarially robust imagenet models transfer better?,” 2020. 25
- [67] Vikash Sehwal, Shiqi Wang, Prateek Mittal, and Suman Jana, “Hydra: Pruning adversarially robust neural networks,” 2020. 25
- [68] Vikash Sehwal, Saeed Mahloujifar, Tinashe Handina, Sihui Dai, Chong Xiang, Mung Chiang, and Prateek Mittal, “Robust learning meets generative models: Can proxy distributions improve adversarial robustness?,” 2021. 25
- [69] Chawin Sitawarin, Supriyo Chakraborty, and David Wagner, “Sat: Improving adversarial training via curriculum-based loss smoothing,” 2021. 25
- [70] Kaustubh Sridhar, Oleg Sokolsky, Insup Lee, and James Weimer, “Improving neural network robustness via persistency of excitation,” 2021. 25
- [71] Yisen Wang, Difan Zou, Jinfeng Yi, James Bailey, Xingjun Ma, and Quanquan Gu, “Improving adversarial robustness requires revisiting misclassified examples,” in *International Conference on Learning Representations*, 2020. 25
- [72] Eric Wong, Leslie Rice, and J. Zico Kolter, “Fast is better than free: Revisiting adversarial training,” 2020. 25
- [73] Dongxian Wu, Shu tao Xia, and Yisen Wang, “Adversarial weight perturbation helps robust generalization,” 2020. 25
- [74] Hongyang Zhang, Yaodong Yu, Jiantao Jiao, Eric P. Xing, Laurent El Ghaoui, and Michael I. Jordan, “Theoretically principled trade-off between robustness and accuracy,” 2019. 25
- [75] Dinghuai Zhang, Tianyuan Zhang, Yiping Lu, Zhanxing Zhu, and Bin Dong, “You only propagate once: Accelerating adversarial training via maximal principle,” 2019. 25
- [76] Jinfeng Zhang, Jianing Zhu, Gang Niu, Bo Han, Masashi Sugiyama, and Mohan Kankanhalli, “Geometry-aware instance-reweighted adversarial training,” 2021. 25
- [77] Jinfeng Zhang, Xilie Xu, Bo Han, Gang Niu, Lizhen Cui, Masashi Sugiyama, and Mohan Kankanhalli, “Attacks which do not kill training make adversarial learning stronger,” 2020. 25
- [78] M. Salvaris, M. Kaznady, V. Paunic, I. Karmanov, A. Bhatia, W.H. Tok, and S. Chikkerur, “Deepseismic: a deep learning library for seismic interpretation,” vol. 2020, no. 1, pp. 1–5, 2020. 25
- [79] Nikita Misiura, “starnet.” <https://github.com/nekitmm/starnet>, 2018. 25
- [80] Han Zhang, Tao Xu, Hongsheng Li, Shaoting Zhang, Xiaogang Wang, Xiaolei Huang, and Dimitris Metaxas, “Stackgan++: Realistic image synthesis with stacked generative adversarial networks,” 2018. 25
- [81] Tero Karras, Samuli Laine, and Timo Aila, “A style-based generator architecture for generative adversarial networks,” 2019. 25, 26
- [82] Alexey Kurakin, Ian Goodfellow, and Samy Bengio, “Adversarial machine learning at scale,” 2017. 26
- [83] My Kieu, Andrew D. Bagdanov, Marco Bertini, and Alberto Del Bimbo, “Domain adaptation for privacy-preserving pedestrian detection in thermal imagery,” in *ICIAP (2)*, pp. 203–213, 2019. 26
- [84] Weijian Xu, Yifan Xu, Tyler Chang, and Zhuowen Tu, “Co-scale conv-attentional image transformers,” 2021. 26
- [85] Chien-Yao Wang, Hong-Yuan Mark Liao, I-Hau Yeh, Yueh-Hua Wu, Ping-Yang Chen, and Jun-Wei Hsieh, “Cspnet: A new backbone that can enhance learning capability of cnn,” 2019. 26
- [86] Fisher Yu, Dequan Wang, Evan Shelhamer, and Trevor Darrell, “Deep layer aggregation,” 2019. 26
- [87] Shang-Hua Gao, Ming-Ming Cheng, Kai Zhao, Xin-Yu Zhang, Ming-Hsuan Yang, and Philip Torr, “Res2net: A new multi-scale backbone architecture,” 2021. 26, 28
- [88] Yunpeng Chen, Jianan Li, Huaxin Xiao, Xiaojie Jin, Shuicheng Yan, and Jiashi Feng, “Dual path networks,” 2017. 26
- [89] Qilong Wang, Banggu Wu, Pengfei Zhu, Peihua Li, Wangmeng Zuo, and Qinghua Hu, “Eca-net: Efficient channel attention for deep convolutional neural networks,” 2020. 26
- [90] Suyog Gupta and Mingxing Tan, “Efficientnet-edgetpu: Creating accelerator-optimized neural networks with autotml,” Aug 2019. 26, 30
- [91] Youngwan Lee, Joong won Hwang, Sangrok Lee, Yuseok Bae, and Jongyul Park, “An energy and gpu-computation efficient backbone network for real-time object detection,” 2019. 26
- [92] Mingxing Tan and Quoc V. Le, “Efficientnetv2: Smaller models and faster training,” 2021. 26, 30
- [93] Bichen Wu, Xiaoliang Dai, Peizhao Zhang, Yanghan Wang, Fei Sun, Yiming Wu, Yuandong Tian, Peter Vajda, Yangqing Jia, and Kurt Keutzer, “Fbnet: Hardware-aware efficient convnet design via differentiable neural architecture search,” 2019. 26
- [94] Christian Szegedy, Sergey Ioffe, Vincent Vanhoucke, and Alex Alemi, “Inception-v4, inception-resnet and the impact of residual connections on learning,” 2016. 26, 27
- [95] Ming Lin, Hesun Chen, Xiuyu Sun, Qi Qian, Hao Li, and Rong Jin, “Neural architecture design for gpu-efficient networks,” 2020. 26

- [96] Jian Guo, He He, Tong He, Leonard Lausen, Mu Li, Haibin Lin, Xingjian Shi, Chenguang Wang, Junyuan Xie, Sheng Zha, Aston Zhang, Hang Zhang, Zhi Zhang, Zhongyue Zhang, Shuai Zheng, and Yi Zhu, "Gluoncv and gluonnlp: Deep learning in computer vision and natural language processing," *Journal of Machine Learning Research*, vol. 21, no. 23, pp. 1–7, 2020. 27
- [97] Niv Nayman, Yonathan Aflalo, Asaf Noy, and Lihi Zelnik-Manor, "Hardcore-nas: Hard constrained differentiable neural architecture search," 2021. 27
- [98] Jingdong Wang, Ke Sun, Tianheng Cheng, Borui Jiang, Chaorui Deng, Yang Zhao, Dong Liu, Yadong Mu, Minghui Tan, Xinggang Wang, Wenyu Liu, and Bin Xiao, "Deep high-resolution representation learning for visual recognition," 2020. 27
- [99] Jie Hu, Li Shen, Samuel Albanie, Gang Sun, and Enhua Wu, "Squeeze-and-excitation networks," 2019. 27, 29
- [100] Mingxing Tan and Quoc V. Le, "Mixconv: Mixed depth-wise convolutional kernels," 2019. 27, 30
- [101] Mingxing Tan, Bo Chen, Ruoming Pang, Vijay Vasudevan, Mark Sandler, Andrew Howard, and Quoc V. Le, "Mnasnet: Platform-aware neural architecture search for mobile," 2019. 27, 29, 31
- [102] Andrew Howard, Mark Sandler, Grace Chu, Liang-Chieh Chen, Bo Chen, Mingxing Tan, Weijun Wang, Yukun Zhu, Ruoming Pang, Vijay Vasudevan, Quoc V. Le, and Hartwig Adam, "Searching for mobilenetv3," 2019. 27, 28, 30
- [103] Byeongho Heo, Sangdoo Yun, Dongyoon Han, Sanghyuk Chun, Junsuk Choe, and Seong Joon Oh, "Rethinking spatial dimensions of vision transformers," 2021. 28
- [104] Nathan Silberman and Sergio Guadarrama, "Tensorflow-slim image classification model library." <https://github.com/tensorflow/models/tree/master/research/slim>, 2016. 28
- [105] Ilija Radosavovic, Raj Prateek Kosaraju, Ross Girshick, Kaiming He, and Piotr Dollár, "Designing network design spaces," 2020. 28
- [106] Chenxi Liu, Barret Zoph, Maxim Neumann, Jonathon Shlens, Wei Hua, Li-Jia Li, Li Fei-Fei, Alan Yuille, Jonathan Huang, and Kevin Murphy, "Progressive neural architecture search," 2018. 28
- [107] Xiaohan Ding, Xiangyu Zhang, Ningning Ma, Jungong Han, Guiguang Ding, and Jian Sun, "Repvgg: Making vgg-style convnets great again," 2021. 28
- [108] Irwan Bello, William Fedus, Xianzhi Du, Ekin D. Cubuk, Aravind Srinivas, Tsung-Yi Lin, Jonathon Shlens, and Barret Zoph, "Revisiting resnets: Improved training and scaling strategies," 2021. 29
- [109] Saining Xie, Ross Girshick, Piotr Dollár, Zhuowen Tu, and Kaiming He, "Aggregated residual transformations for deep neural networks," 2017. 29, 31
- [110] Dongyoon Han, Sangdoo Yun, Byeongho Heo, and Youngjoon Yoo, "Rethinking channel dimensions for efficient model design," 2021. 29
- [111] Dushyant Mehta, Oleksandr Sotnychenko, Franziska Mueller, Weipeng Xu, Mohamed Elgharib, Pascal Fua, Hans-Peter Seidel, Helge Rhodin, Gerard Pons-Moll, and Christian Theobalt, "Xnect: Real-time multi-person 3d motion capture with a single rgb camera," 2020. 29
- [112] Xiang Li, Wenhui Wang, Xiaolin Hu, and Jian Yang, "Selective kernel networks," 2019. 29
- [113] Dimitrios Stamoulis, Ruizhou Ding, Di Wang, Dimitrios Lymberopoulos, Bodhi Priyantha, Jie Liu, and Diana Marculescu, "Single-path nas: Designing hardware-efficient convnets in less than 4 hours," 2019. 29
- [114] I. Zeki Yalniz, Hervé Jégou, Kan Chen, Manohar Paluri, and Dhruv Mahajan, "Billion-scale semi-supervised learning for image classification," 2019. 29
- [115] Cihang Xie, Mingxing Tan, Boqing Gong, Jiang Wang, Alan Yuille, and Quoc V. Le, "Adversarial examples improve image recognition," 2020. 29, 30
- [116] Qizhe Xie, Minh-Thang Luong, Eduard Hovy, and Quoc V. Le, "Self-training with noisy student improves imagenet classification," 2020. 29, 30
- [117] François Chollet, "Xception: Deep learning with depthwise separable convolutions," 2017. 30
- [118] Zhengsu Chen, Lingxi Xie, Jianwei Niu, Xuefeng Liu, Longhui Wei, and Qi Tian, "Visformer: The vision-friendly transformer," 2021. 30
- [119] Kai Han, Yunhe Wang, Qiulin Zhang, Wei Zhang, Chun-jing Xu, and Tong Zhang, "Model rubik's cube: Twisting resolution, depth and width for tinynets," 2020. 30
- [120] Sergey Zagoruyko and Nikos Komodakis, "Wide residual networks," 2017. 30, 31, 32
- [121] Xiangxiang Chu, Zhi Tian, Yuqing Wang, Bo Zhang, Haibing Ren, Xiaolin Wei, Huaxia Xia, and Chunhua Shen, "Twins: Revisiting the design of spatial attention in vision transformers," 2021. 30, 31
- [122] Changqian Yu, Jingbo Wang, Chao Peng, Changxin Gao, Gang Yu, and Nong Sang, "Learning a discriminative feature network for semantic segmentation," 2018. 31
- [123] Hengshuang Zhao, Jianping Shi, Xiaojuan Qi, Xiaogang Wang, and Jiaya Jia, "Pyramid scene parsing network," 2017. 31
- [124] Ningning Ma, Xiangyu Zhang, Hai-Tao Zheng, and Jian Sun, "Shufflenet v2: Practical guidelines for efficient cnn architecture design," 2018. 31
- [125] Forrest N. Iandola, Song Han, Matthew W. Moskewicz, Khalid Ashraf, William J. Dally, and Kurt Keutzer, "Squeezenet: Alexnet-level accuracy with 50x fewer parameters and 0.5mb model size," 2016. 31
- [126] Joseph Paul Cohen, Mohammad Hashir, Rupert Brooks, and Hadrien Bertrand, "On the limits of cross-domain generalization in automated x-ray prediction," 2020. 31, 32
- [127] Olaf Ronneberger, Philipp Fischer, and Thomas Brox, "U-net: Convolutional networks for biomedical image segmentation," 2015. 32
- [128] Ultralytics, "Yolov5." <https://github.com/ultralytics/yolov5>, 2020. 32
