# Supplementary material
Source: ML conference proceedings conference paper supplement (https://openaccess.thecvf.com/content/CVPR2022/html/Gavrikov_CNN_Filter_DB_CVPR_2022_paper.html)
Supplement: Supplementary file 2 [file Gavrikov_CNN_Filter_DB_CVPR_2022_supplemental.zip]

# Datasheet for Dataset “CNN-Filter-DB”

Paul Gavrikov, Janis Keuper

March 2022

Repository: <https://github.com/paulgavrikov/CNN-Filter-DB>.

This document is based on [Datasheets for Datasets](#).

## 1 Changelist

| Version | DOI                    | Comment                                                                  |
|---------|------------------------|--------------------------------------------------------------------------|
| 0.1.0   | -                      | Preliminary dataset as presented in the NeurIPS 2021 DistShift Workshop. |
| 1.0.0   | 10.5281/zenodo.6371680 | Initial dataset as released at CVPR 2022.                                |

## 2 Datasheet

### Motivation

#### For what purpose was the dataset created?

Instead of analyzing the original training and test data of CNNs, we propose to study distribution shifts in the learned weights of trained models.

#### Who created this dataset (e.g., which team, research group) and on behalf of which entity (e.g., company, institution, organization)?

Paul Gavrikov and Janis Keuper on behalf of Offenburg University and Fraunhofer ITWM.

#### Who funded the creation of the dataset?

This work was supported in part by the German Ministry for Science, Research and Arts Baden-Wuerttemberg (MWK) under Grant 32-7545.20/45/1 Quality Assurance of Machine Learning Applications (Q-AMeLiA). <https://q-amelia.in.hs-furtwangen.de/>.

#### Any other comments?

-

### Composition

#### What do the instances that comprise the dataset represent (e.g., documents, photos, people, countries)?

The instances represent individual  $3 \times 3$  convolution filters accompanied by meta data.

#### How many instances are there in total (of each type, if appropriate)?

The initial release consists of 1,464,797,156 filters.

#### Does the dataset contain all possible instances or is it a sample (not necessarily random) of instances from a larger set?

The dataset contains only a fraction of possible tasks / datasets. In particular the data is biased towards *classification* models and/or *natural* data sets such as *ImageNet1k*. Further, some splits will over-represent specific dimensions e.g. tasks may include exclusive visual categories and vice versa. Also, many of the collected models show a large amount of degenerated layers.

#### What data does each instance consist of? “Raw” data (e.g., unprocessed text or images) or features?

An instance consists of a  $3 \times 3$  filter (stored as a flattened *numpy* array) as extracted from the respective model and (structured) meta information.

#### Is there a label or target associated with each instance?

No.

#### Is any information missing from individual instances?

No information is missing to the best of our knowledge.

#### Are relationships between individual instances made explicit (e.g., users’ movie ratings, social network links)?

No.

**Are there recommended data splits (e.g., training, development / validation, testing)?**  
No.

**Are there any errors, sources of noise, or redundancies in the dataset?**  
To the best of our knowledge, there are no errors, source of noise, or redundancies.

**Is the dataset self-contained, or does it link to or otherwise rely on external resources (e.g., websites, tweets, other datasets)?**  
The database is self-contained.

**Does the dataset contain data that might be considered confidential (e.g., data that is protected by legal privilege or by doctor-patient confidentiality, data that includes the content of individuals non-public communications)?**  
All samples were obtained from publicly available models. We therefore do not believe that any model is considered confidential.

**Does the dataset contain data that, if viewed directly, might be offensive, insulting, threatening, or might otherwise cause anxiety?**  
No.

**Does the dataset relate to people?**  
No, but some of the models that were processed may have been trained on datasets that contain people.

**Any other comments?** -

|                           |
|---------------------------|
| <b>Collection Process</b> |
|---------------------------|

**How was the data associated with each instance acquired?**  
Found checkpoints of models were converted to ONNX. Then, a pipeline extracted the filters. Meta data was recorded manually. Only selected models were verified to be actually working, but statistical tools were used to validate that all models contain learned weights.

**What mechanisms or procedures were used to collect the data (e.g., hardware apparatus or sensor, manual human curation, software program, software API)?**  
The dataset was created manually by the authors. In addition to automatic downloads from TorchHub etc., we manually downloaded models from various implementations (i.e. also various frameworks), converted all models to ONNX and then extracted the filters alongside meta information. The conversion pipeline is available here: <https://github.com/paulgavrikov/onnxzoo2filterdb>.

**If the dataset is a sample from a larger set, what was the sampling strategy (e.g., deterministic, probabilistic with specific sampling probabilities)?**  
Random sampling on a first-come first-serve basis.

**Who was involved in the data collection process (e.g., students, crowdworkers, contractors) and how were they compensated (e.g., how much were crowdworkers paid)?**  
Only the authors were involved in the data collection process. They were compensated by their employers for regular work hours.

**Over what timeframe was the data collected? Does this timeframe match the creation timeframe of the data associated with the instances (e.g., recent crawl of old news articles)?**  
The models were collected from January to November 2021.

**Were any ethical review processes conducted (e.g., by an institutional review board)?**  
No. The accompanied submission was also not found to be ethically relevant by multiple independent reviewers.

**Does the dataset relate to people?**  
No, but some of the models that were processed may have been trained on datasets that contain people.

|                                        |
|----------------------------------------|
| <b>Preprocessing/cleaning/labeling</b> |
|----------------------------------------|

**Was any preprocessing/cleaning/labeling of the data done (e.g., discretization or bucketing, tokenization, part-of-speech tagging, SIFT feature extraction, removal of instances, processing of missing values)?**  
The original models were exported to ONNX from their source framework. We are not aware of any issues regarding the filters during the export. The filters were extracted from the ONNX models.

**Was the “raw” data saved in addition to the preprocessed / cleaned / labeled data (e.g., to support unanticipated future uses)?**  
No.

**Is the software used to preprocess/clean/label the instances available?**  
The code for the model export is not provided. The filter extraction code can be found here: <https://github.com/paulgavrikov/onnxzoo2filterdb>.

**Any other comments?**  
-

Uses

**Has the dataset been used for any tasks already?**  
At point of creation of this file, the dataset has been used in two publications regarding distribution shifts in learned convolutional filters.

**Is there a repository that links to any or all papers or systems that use the dataset?**  
Since this dataset is publicly available we cannot track all usages of it. However, in terms of publications, we advise that interested parties lookup literature introducing this dataset. Selected papers will be highlighted here: <https://github.com/paulgavrikov/cnn-filter-db>.

**What (other) tasks could the dataset be used for?**  
We hope that this dataset sparks a fruitful discussion on shifts in learned filter weights. The collected data can be used in many research domains including, but not limited to, filter initialization and robustness.

**Is there anything about the composition of the dataset or the way it was collected and pre-processed/cleaned/labeled that might impact future uses?**  
No.

**Are there tasks for which the dataset should not be used?**  
You are free to use the dataset for any application.

**Any other comments?**  
-

Distribution

**Will the dataset be distributed to third parties outside of the entity (e.g., company, institution, organization) on behalf of which the dataset was created?**  
The dataset is publicly available.

**How will the dataset will be distributed (e.g., tarball on website, API, GitHub)**  
The dataset is distributed as HDF-5 (.h5) file containing both, the filters, and meta. The file is hosted on Zenodo under DOI: 10.5281/zenodo.6371680.

**When will the dataset be distributed?**  
The dataset is being made available by June 19th 2022.

**Will the dataset be distributed under a copyright or other intellectual property (IP) license, and/or under applicable terms of use (ToU)?**  
Yes, the dataset is licensed under the Creative Commons Attribution-ShareAlike 4.0 International License.

Attribution-ShareAlike 4.0 International

=====

Creative Commons Corporation ("Creative Commons") is not a law firm and does not provide legal services or legal advice. Distribution of Creative Commons public licenses does not create a lawyer-client or other relationship. Creative Commons makes its licenses and related information available on an "as-is" basis. Creative Commons gives no warranties regarding its licenses, any material licensed under their terms and conditions, or any related information. Creative Commons disclaims all liability for damages resulting from their use to the fullest extent possible.

Using Creative Commons Public Licenses

Creative Commons public licenses provide a standard set of terms and conditions that creators and other rights holders may use to share original works of authorship and other material subject to copyright and certain other rights specified in the public license below. The following considerations are for informational purposes only, are not exhaustive, and do not form part of our licenses.

Considerations for licensors: Our public licenses are intended for use by those authorized to give the public permission to use material in ways otherwise restricted by copyright and certain other rights. Our licenses are irrevocable. Licensors should read and understand the terms and conditions of the license they choose before applying it. Licensors should also secure all rights necessary before applying our licenses so that the public can reuse the material as expected. Licensors should clearly mark any material not subject to the license. This includes other CC-

licensed material, or material used under an exception or limitation to copyright. More considerations for licensors: [wiki.creativecommons.org/Considerations\\_for\\_licensors](http://wiki.creativecommons.org/Considerations_for_licensors)

Considerations for the public: By using one of our public licenses, a licensor grants the public permission to use the licensed material under specified terms and conditions. If the licensor's permission is not necessary for any reason--for example, because of any applicable exception or limitation to copyright--then that use is not regulated by the license. Our licenses grant only permissions under copyright and certain other rights that a licensor has authority to grant. Use of the licensed material may still be restricted for other reasons, including because others have copyright or other rights in the material. A licensor may make special requests, such as asking that all changes be marked or described. Although not required by our licenses, you are encouraged to respect those requests where reasonable. More considerations for the public: [wiki.creativecommons.org/Considerations\\_for\\_licensees](http://wiki.creativecommons.org/Considerations_for_licensees)

=====

## Creative Commons Attribution-ShareAlike 4.0 International Public License

By exercising the Licensed Rights (defined below), You accept and agree to be bound by the terms and conditions of this Creative Commons Attribution-ShareAlike 4.0 International Public License ("Public License"). To the extent this Public License may be interpreted as a contract, You are granted the Licensed Rights in consideration of Your acceptance of these terms and conditions, and the Licensor grants You such rights in consideration of benefits the Licensor receives from making the Licensed Material available under these terms and conditions.

### Section 1 -- Definitions.

- a. Adapted Material means material subject to Copyright and Similar Rights that is derived from or based upon the Licensed Material and in which the Licensed Material is translated, altered, arranged, transformed, or otherwise modified in a manner requiring permission under the Copyright and Similar Rights held by the Licensor. For purposes of this Public License, where the Licensed Material is a musical work, performance, or sound recording, Adapted Material is always produced where the Licensed Material is synched in timed relation with a moving image.
- b. Adapter's License means the license You apply to Your Copyright and Similar Rights in Your contributions to Adapted Material in accordance with the terms and conditions of this Public License.
- c. BY-SA Compatible License means a license listed at [creativecommons.org/compatiblelicenses](http://creativecommons.org/compatiblelicenses), approved by Creative Commons as essentially the equivalent of this Public License.
- d. Copyright and Similar Rights means copyright and/or similar rights closely related to copyright including, without limitation, performance, broadcast, sound recording, and Sui Generis Database Rights, without regard to how the rights are labeled or categorized. For purposes of this Public License, the rights specified in Section 2(b)(1)-(2) are not Copyright and Similar Rights.
- e. Effective Technological Measures means those measures that, in the absence of proper authority, may not be circumvented under laws fulfilling obligations under Article 11 of the WIPO Copyright Treaty adopted on December 20, 1996, and/or similar international agreements.
- f. Exceptions and Limitations means fair use, fair dealing, and/or

any other exception or limitation to Copyright and Similar Rights that applies to Your use of the Licensed Material.

- g. License Elements means the license attributes listed in the name of a Creative Commons Public License. The License Elements of this Public License are Attribution and ShareAlike.
- h. Licensed Material means the artistic or literary work, database, or other material to which the Licensor applied this Public License.
- i. Licensed Rights means the rights granted to You subject to the terms and conditions of this Public License, which are limited to all Copyright and Similar Rights that apply to Your use of the Licensed Material and that the Licensor has authority to license.
- j. Licensor means the individual(s) or entity(ies) granting rights under this Public License.
- k. Share means to provide material to the public by any means or process that requires permission under the Licensed Rights, such as reproduction, public display, public performance, distribution, dissemination, communication, or importation, and to make material available to the public including in ways that members of the public may access the material from a place and at a time individually chosen by them.
- l. Sui Generis Database Rights means rights other than copyright resulting from Directive 96/9/EC of the European Parliament and of the Council of 11 March 1996 on the legal protection of databases, as amended and/or succeeded, as well as other essentially equivalent rights anywhere in the world.
- m. You means the individual or entity exercising the Licensed Rights under this Public License. Your has a corresponding meaning.

## Section 2 -- Scope.

### a. License grant.

1. Subject to the terms and conditions of this Public License, the Licensor hereby grants You a worldwide, royalty-free, non-sublicensable, non-exclusive, irrevocable license to exercise the Licensed Rights in the Licensed Material to:
  - a. reproduce and Share the Licensed Material, in whole or in part; and
  - b. produce, reproduce, and Share Adapted Material.
2. Exceptions and Limitations. For the avoidance of doubt, where Exceptions and Limitations apply to Your use, this Public License does not apply, and You do not need to comply with its terms and conditions.
3. Term. The term of this Public License is specified in Section 6(a).
4. Media and formats; technical modifications allowed. The Licensor authorizes You to exercise the Licensed Rights in all media and formats whether now known or hereafter created, and to make technical modifications necessary to do so. The Licensor waives and/or agrees not to assert any right or authority to forbid You from making technical modifications necessary to exercise the Licensed Rights, including technical modifications necessary to circumvent Effective Technological Measures. For purposes of this Public License, simply making modifications authorized by this Section 2(a)(4) never produces Adapted Material.
5. Downstream recipients.

- a. Offer from the Licensor -- Licensed Material. Every recipient of the Licensed Material automatically receives an offer from the Licensor to exercise the Licensed Rights under the terms and conditions of this Public License.
  - b. Additional offer from the Licensor -- Adapted Material. Every recipient of Adapted Material from You automatically receives an offer from the Licensor to exercise the Licensed Rights in the Adapted Material under the conditions of the Adapter's License You apply.
  - c. No downstream restrictions. You may not offer or impose any additional or different terms or conditions on, or apply any Effective Technological Measures to, the Licensed Material if doing so restricts exercise of the Licensed Rights by any recipient of the Licensed Material.
6. No endorsement. Nothing in this Public License constitutes or may be construed as permission to assert or imply that You are, or that Your use of the Licensed Material is, connected with, or sponsored, endorsed, or granted official status by, the Licensor or others designated to receive attribution as provided in Section 3(a)(1)(A)(i).

b. Other rights.

- 1. Moral rights, such as the right of integrity, are not licensed under this Public License, nor are publicity, privacy, and/or other similar personality rights; however, to the extent possible, the Licensor waives and/or agrees not to assert any such rights held by the Licensor to the limited extent necessary to allow You to exercise the Licensed Rights, but not otherwise.
- 2. Patent and trademark rights are not licensed under this Public License.
- 3. To the extent possible, the Licensor waives any right to collect royalties from You for the exercise of the Licensed Rights, whether directly or through a collecting society under any voluntary or waivable statutory or compulsory licensing scheme. In all other cases the Licensor expressly reserves any right to collect such royalties.

Section 3 -- License Conditions.

Your exercise of the Licensed Rights is expressly made subject to the following conditions.

a. Attribution.

- 1. If You Share the Licensed Material (including in modified form), You must:
  - a. retain the following if it is supplied by the Licensor with the Licensed Material:
    - i. identification of the creator(s) of the Licensed Material and any others designated to receive attribution, in any reasonable manner requested by the Licensor (including by pseudonym if designated);
    - ii. a copyright notice;
    - iii. a notice that refers to this Public License;
    - iv. a notice that refers to the disclaimer of

warranties;

- v. a URI or hyperlink to the Licensed Material to the extent reasonably practicable;
  - b. indicate if You modified the Licensed Material and retain an indication of any previous modifications; and
  - c. indicate the Licensed Material is licensed under this Public License, and include the text of, or the URI or hyperlink to, this Public License.
- 2. You may satisfy the conditions in Section 3(a)(1) in any reasonable manner based on the medium, means, and context in which You Share the Licensed Material. For example, it may be reasonable to satisfy the conditions by providing a URI or hyperlink to a resource that includes the required information.
- 3. If requested by the Licensor, You must remove any of the information required by Section 3(a)(1)(A) to the extent reasonably practicable.

b. ShareAlike.

In addition to the conditions in Section 3(a), if You Share Adapted Material You produce, the following conditions also apply.

- 1. The Adapter's License You apply must be a Creative Commons license with the same License Elements, this version or later, or a BY-SA Compatible License.
- 2. You must include the text of, or the URI or hyperlink to, the Adapter's License You apply. You may satisfy this condition in any reasonable manner based on the medium, means, and context in which You Share Adapted Material.
- 3. You may not offer or impose any additional or different terms or conditions on, or apply any Effective Technological Measures to, Adapted Material that restrict exercise of the rights granted under the Adapter's License You apply.

Section 4 -- Sui Generis Database Rights.

Where the Licensed Rights include Sui Generis Database Rights that apply to Your use of the Licensed Material:

- a. for the avoidance of doubt, Section 2(a)(1) grants You the right to extract, reuse, reproduce, and Share all or a substantial portion of the contents of the database;
- b. if You include all or a substantial portion of the database contents in a database in which You have Sui Generis Database Rights, then the database in which You have Sui Generis Database Rights (but not its individual contents) is Adapted Material, including for purposes of Section 3(b); and
- c. You must comply with the conditions in Section 3(a) if You Share all or a substantial portion of the contents of the database.

For the avoidance of doubt, this Section 4 supplements and does not replace Your obligations under this Public License where the Licensed Rights include other Copyright and Similar Rights.

Section 5 -- Disclaimer of Warranties and Limitation of Liability.

- a. UNLESS OTHERWISE SEPARATELY UNDERTAKEN BY THE LICENSOR, TO THE EXTENT POSSIBLE, THE LICENSOR OFFERS THE LICENSED MATERIAL AS-IS AND AS-AVAILABLE, AND MAKES NO REPRESENTATIONS OR WARRANTIES OF ANY KIND CONCERNING THE LICENSED MATERIAL, WHETHER EXPRESS,

IMPLIED, STATUTORY, OR OTHER. THIS INCLUDES, WITHOUT LIMITATION, WARRANTIES OF TITLE, MERCHANTABILITY, FITNESS FOR A PARTICULAR PURPOSE, NON-INFRINGEMENT, ABSENCE OF LATENT OR OTHER DEFECTS, ACCURACY, OR THE PRESENCE OR ABSENCE OF ERRORS, WHETHER OR NOT KNOWN OR DISCOVERABLE. WHERE DISCLAIMERS OF WARRANTIES ARE NOT ALLOWED IN FULL OR IN PART, THIS DISCLAIMER MAY NOT APPLY TO YOU.

- b. TO THE EXTENT POSSIBLE, IN NO EVENT WILL THE LICENSOR BE LIABLE TO YOU ON ANY LEGAL THEORY (INCLUDING, WITHOUT LIMITATION, NEGLIGENCE) OR OTHERWISE FOR ANY DIRECT, SPECIAL, INDIRECT, INCIDENTAL, CONSEQUENTIAL, PUNITIVE, EXEMPLARY, OR OTHER LOSSES, COSTS, EXPENSES, OR DAMAGES ARISING OUT OF THIS PUBLIC LICENSE OR USE OF THE LICENSED MATERIAL, EVEN IF THE LICENSOR HAS BEEN ADVISED OF THE POSSIBILITY OF SUCH LOSSES, COSTS, EXPENSES, OR DAMAGES. WHERE A LIMITATION OF LIABILITY IS NOT ALLOWED IN FULL OR IN PART, THIS LIMITATION MAY NOT APPLY TO YOU.
- c. The disclaimer of warranties and limitation of liability provided above shall be interpreted in a manner that, to the extent possible, most closely approximates an absolute disclaimer and waiver of all liability.

#### Section 6 -- Term and Termination.

- a. This Public License applies for the term of the Copyright and Similar Rights licensed here. However, if You fail to comply with this Public License, then Your rights under this Public License terminate automatically.
- b. Where Your right to use the Licensed Material has terminated under Section 6(a), it reinstates:
  - 1. automatically as of the date the violation is cured, provided it is cured within 30 days of Your discovery of the violation; or
  - 2. upon express reinstatement by the Licensor.

For the avoidance of doubt, this Section 6(b) does not affect any right the Licensor may have to seek remedies for Your violations of this Public License.

- c. For the avoidance of doubt, the Licensor may also offer the Licensed Material under separate terms or conditions or stop distributing the Licensed Material at any time; however, doing so will not terminate this Public License.
- d. Sections 1, 5, 6, 7, and 8 survive termination of this Public License.

#### Section 7 -- Other Terms and Conditions.

- a. The Licensor shall not be bound by any additional or different terms or conditions communicated by You unless expressly agreed.
- b. Any arrangements, understandings, or agreements regarding the Licensed Material not stated herein are separate from and independent of the terms and conditions of this Public License.

#### Section 8 -- Interpretation.

- a. For the avoidance of doubt, this Public License does not, and shall not be interpreted to, reduce, limit, restrict, or impose conditions on any use of the Licensed Material that could lawfully be made without permission under this Public License.
- b. To the extent possible, if any provision of this Public License is deemed unenforceable, it shall be automatically reformed to the minimum extent necessary to make it enforceable. If the provision



cannot be reformed, it shall be severed from this Public License without affecting the enforceability of the remaining terms and conditions.

- c. No term or condition of this Public License will be waived and no failure to comply consented to unless expressly agreed to by the Licensor.
- d. Nothing in this Public License constitutes or may be interpreted as a limitation upon, or waiver of, any privileges and immunities that apply to the Licensor or You, including from the legal processes of any jurisdiction or authority.

=====

Creative Commons is not a party to its public licenses. Notwithstanding, Creative Commons may elect to apply one of its public licenses to material it publishes and in those instances will be considered the "Licensor." The text of the Creative Commons public licenses is dedicated to the public domain under the CC0 Public Domain Dedication. Except for the limited purpose of indicating that material is shared under a Creative Commons public license or as otherwise permitted by the Creative Commons policies published at [creativecommons.org/policies](https://creativecommons.org/policies), Creative Commons does not authorize the use of the trademark "Creative Commons" or any other trademark or logo of Creative Commons without its prior written consent including, without limitation, in connection with any unauthorized modifications to any of its public licenses or any other arrangements, understandings, or agreements concerning use of licensed material. For the avoidance of doubt, this paragraph does not form part of the public licenses.

Creative Commons may be contacted at [creativecommons.org](https://creativecommons.org).

**Have any third parties imposed IP-based or other restrictions on the data associated with the instances?**

No.

**Do any export controls or other regulatory restrictions apply to the dataset or to individual instances?**

No.

**Any other comments?**

-

|                    |
|--------------------|
| <b>Maintenance</b> |
|--------------------|

**Who will be supporting/hosting/maintaining the dataset?**

The authors will be maintaining the dataset.

**How can the owner/curator/manager of the dataset be contacted (e.g., email address)?**

Please raise any issues in the GitHub repository.

**Is there an erratum?**

We maintain a versioning list in here ([Table 1](#)), in the GitHub repo, and will include an erratum, if necessary.

**Will the dataset be updated (e.g., to correct labeling errors, add new instances, delete instances)?**

The dataset will not be frequently updated, but we plan on integrating more models as they become available. Updates will be communicated via GitHub.

**If the dataset relates to people, are there applicable limits on the retention of the data associated with the instances (e.g., were individuals in question told that their data would be retained for a fixed period of time and then deleted)?**

The dataset does not relate to people, but some of the models that were processed may have been trained on datasets that contain people. For specific questions regarding this topic please contact the publishers of the used models.

**Will older versions of the dataset continue to be supported / hosted / maintained?**

Due to the sheer volume of the data we may no continue to host old data. Obsolescence will be communicated to users via GitHub.

**If others want to extend/augment/build on/contribute to the dataset, is there a mechanism for them to do so?**

Please open an issue in the GitHub repository to discuss any contribution.

**Any other comments?**

-
