# Supplementary material
Source: ML conference proceedings conference paper supplement (https://openaccess.thecvf.com/content/CVPR2022/html/Gavrikov_CNN_Filter_DB_CVPR_2022_paper.html)
Supplement: Supplementary file 3 [file Gavrikov_CNN_Filter_DB_CVPR_2022_supplemental.zip]

Archive with 3 entries (3 files):
- 08910-supp.pdf
- 08910-supp-datasheet.pdf
- 08910-supp-README.txt
