# Supplementary material
Source: ML conference proceedings conference paper supplement (https://openaccess.thecvf.com/content/CVPR2022/html/Gavrikov_CNN_Filter_DB_CVPR_2022_paper.html)
Supplement: Supplementary file 3 [file Gavrikov_CNN_Filter_DB_CVPR_2022_supplemental.zip › 08910-supp-README.txt]

A link to the dataset and example code can be found here: https://github.com/paulgavrikov/cnn-filter-db
